# Supplementary material for: Attempted Suicide Is Independently Associated with Increased In-Hospital Mortality and Hospital Length of Stay among Injured Patients at Community Tertiary Hospital in Japan: A Retrospective Study with Propensity Score Matching Analysis
Source: MDPI journal article supplement (doi:10.3390/ijerph21020121), 2024-01-23
Supplement: s1 [file s1]

**Table S1. Comparison of mortality rate: no suicide attempt group vs suicide attempt group.**

|                | Full cohort                   |                           |  | <i>P</i> | PS matched cohort            |                           |  | <i>P</i> |
|----------------|-------------------------------|---------------------------|--|----------|------------------------------|---------------------------|--|----------|
|                | No suicide attempt (n = 2531) | Suicide attempt (n = 183) |  |          | No suicide attempt (n = 139) | Suicide attempt (n = 139) |  |          |
| <b>Outcome</b> |                               |                           |  | < 0.001  |                              |                           |  | 0.002    |
| Dead           | 362 (14.3)                    | 69 (37.7)                 |  |          | 29 (20.9)                    | 52 (37.4)                 |  |          |
| Alive          | 2169 (85.7)                   | 114 (62.3)                |  |          | 110 (79.1)                   | 87 (62.6)                 |  |          |

Data are expressed as n (%). PS, propensity score.

**Table S2. Disposition location among survivors: no suicide attempt group vs suicide attempt group.**

|                         | Full cohort                                |                           |  | OR (95% CI)       | PS matched cohort                         |                          |  | OR (95% CI)      |
|-------------------------|--------------------------------------------|---------------------------|--|-------------------|-------------------------------------------|--------------------------|--|------------------|
|                         | No suicide attempt (n = 2169) <sup>a</sup> | Suicide attempt (n = 114) |  |                   | No suicide attempt (n = 110) <sup>a</sup> | Suicide attempt (n = 87) |  |                  |
| Long-term care facility | 165 (7.6)                                  | 6 (5.3)                   |  | 0.68 (0.29–1.56)  | 7 (6.4)                                   | 5 (5.7)                  |  | 0.90 (0.28–2.93) |
| Psychiatric hospital    | 3 (0.1)                                    | 9 (7.9)                   |  | 61.9 (16.5–232.0) | 1 (0.9)                                   | 8 (9.2)                  |  | 11.0 (1.35–90.0) |

<sup>a</sup>The reference set was the no suicide attempt group. Data are expressed as n (%). PS, propensity score.

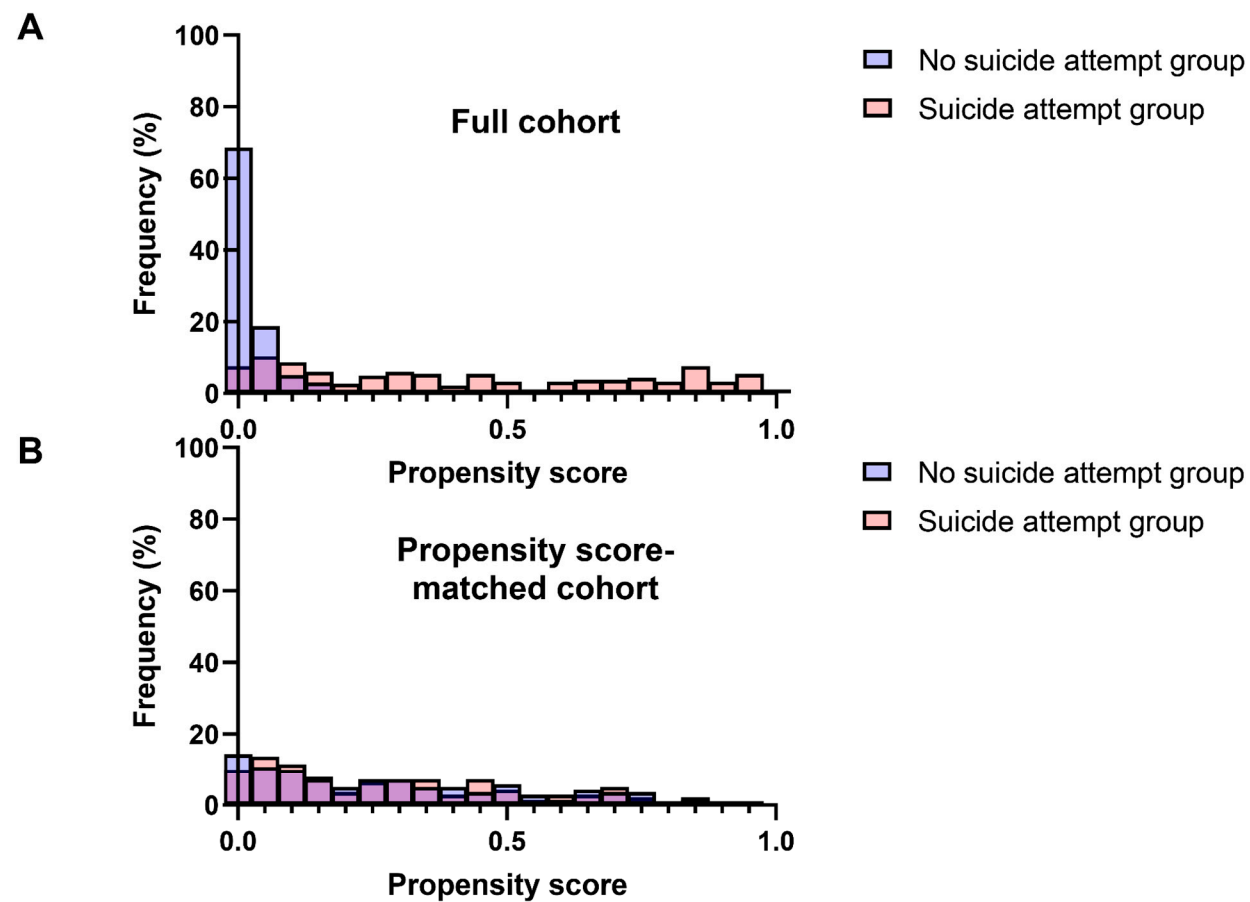

Figure S1. Distribution of propensity score in the full (A) and propensity score-matched (B) cohorts.
