# Supplementary material for: Attempted Suicide Is Independently Associated with Increased In-Hospital Mortality and Hospital Length of Stay among Injured Patients at Community Tertiary Hospital in Japan: A Retrospective Study with Propensity Score Matching Analysis
Source: Int J Environ Res Public Health. 2024 Jan 23;21(2):121. doi: 10.3390/ijerph21020121 (PMC10888049; doi:10.3390/ijerph21020121)
Supplement: Supplementary file 1 [file ijerph-21-00121-s001.zip › DataS1_240120.xlsx]

## Sheet: Data_S1
Suicide Attempt (1=Yes 0=NO)	Age	Male (1=Yes 0=NO)	Admission year	Penetrating injury (1=Yes 0=NO)	Injury Severity Score	AIS (≥3) Head or neck (1=Yes 0=NO)	AIS (≥3) Face (1=Yes 0=NO)	AIS (≥3) Chest (1=Yes 0=NO)	AIS (≥3) Abdomen or pelvic contents (1=Yes 0=NO)	AIS (≥3) Extremities or pelvic girdle (1=Yes 0=NO)	GCS score (4:13–15,3:9–12,2:6–8,1:4–5,0:3)	Systolic blood pressure (4:> 89,3:76–89,2:50–75,1:1–49)	Respiratory rate (4:> 29, 3:10–29, 2:6–9, 1:1–5, 0:0)	Revised Trauma Score	Probability of survival	Charlson Comorbidity Index	Diagnosed mental illness (1=Yes 0=NO)	Weekend admission (1=Yes 0=NO)	Presentation time (1:8:00–16:59,2:17:00–23:59,3:24:00–7:59)	Season (1:Spring, 2:Summer, 3:Autumn, 4: Winter)	Prehospital length of stay	Hospital length of stay	Dead (1=Yes 0=NO)	Emergency endotracheal intubation (1=Yes 0=NO)	Physician-staffed ambulance dispatch (1=Yes 0=NO)	Emergency surgery (1=Yes 0=NO)
1	30	1	2002	0	38	1	0	1	0	0	1	4	4	5.0304	0.653762	1	0	0	3	4	21	12	1	1	0	0
0	55	1	2002	0	17	1	0	0	0	0	2	4	4	5.9672	0.775094	0	0	0	1	4	57	1	0	0	0	0
0	70	0	2002	0	25	1	0	0	0	0	1	4	4	5.0304	0.432615	0	0	0	1	4	59	2	1	1	1	0
0	71	0	2002	0	26	1	0	0	0	0	0	4	4	4.0936	0.224075	0	0	1	1	4	14	2	1	1	0	0
0	45	1	2002	0	17	1	0	0	0	0	3	4	4	6.904	0.982649	0	0	0	2	4	38	1	0	0	1	0
0	48	1	2002	0	18	1	1	0	0	0	4	4	4	7.8408	0.992262	0	0	0	1	4	59	1	0	0	0	0
0	25	1	2002	0	18	0	0	0	0	1	4	4	4	7.8408	0.992262	0	0	0	1	4	17	1	0	0	0	0
0	69	1	2002	0	22	1	0	1	0	0	4	4	4	7.8408	0.933484	0	0	0	3	1	29	1	0	0	0	0
0	50	1	2002	0	17	1	0	0	0	0	4	4	4	7.8408	0.99283	0	0	1	1	1	30	1	0	0	0	0
0	34	1	2002	0	17	1	0	0	0	0	2	4	4	5.9672	0.958613	0	0	0	3	1	26	1	0	0	0	0
0	67	0	2002	1	17	1	0	0	0	0	4	2	4	6.3756	0.83577	3	0	0	3	1	77	1	0	0	0	0
0	49	1	2002	0	25	0	0	0	0	0	4	1	4	5.643	0.901916	1	0	0	2	1	73	29	1	1	1	0
0	46	1	2002	0	16	1	0	0	0	0	4	4	4	7.8408	0.993357	0	0	1	2	1	33	1	0	0	0	0
0	47	1	2002	0	26	0	0	0	1	1	4	3	4	7.1082	0.971813	0	0	0	1	1	60	8	0	0	0	0
0	25	1	2002	0	22	0	1	0	0	1	4	4	4	7.8408	0.989509	0	0	0	2	1	32	1	0	0	0	1
0	52	0	2002	0	24	0	0	0	0	1	4	3	4	7.1082	0.975729	0	0	0	1	1	36	12	0	0	0	1
0	51	1	2002	0	21	0	0	1	0	0	4	4	4	7.8408	0.990277	0	0	1	2	1	73	1	0	0	0	0
0	41	1	2002	0	25	1	0	1	0	0	4	4	4	7.8408	0.986827	0	0	1	1	1	48	13	0	0	1	0
0	50	1	2002	0	26	1	0	0	0	0	4	3	4	7.1082	0.971813	0	0	1	2	1	40	1	0	0	0	0
0	65	1	2002	0	26	0	0	1	1	0	3	4	4	6.904	0.808484	0	0	1	3	1	23	1	0	0	0	0
0	77	0	2002	0	22	1	0	0	0	1	4	4	4	7.8408	0.933484	0	0	1	1	1	19	8	0	0	0	0
0	63	1	2002	0	22	1	1	0	0	0	4	4	4	7.8408	0.933484	0	0	0	2	1	97	1	0	0	1	1
0	33	1	2002	0	22	1	0	1	0	0	3	4	4	6.904	0.974731	0	0	0	3	1	21	15	0	0	0	0
1	49	0	2002	0	50	0	0	1	1	1	1	2	3	3.2744	0.123259	1	1	1	3	1	23	19	0	1	0	0
0	66	1	2002	0	17	0	0	1	0	0	4	4	4	7.8408	0.953712	0	0	0	1	1	41	1	0	0	0	0
0	48	1	2002	0	22	0	0	1	1	0	4	4	4	7.8408	0.989509	0	0	0	2	1	58	1	0	0	0	0
0	58	1	2002	0	43	0	0	1	1	1	4	3	4	7.1082	0.58163	3	0	0	3	1	47	2	1	1	0	1
0	61	1	2002	0	22	1	0	1	0	0	4	4	4	7.8408	0.933484	0	0	0	2	1	47	1	0	0	0	0
0	23	1	2002	0	34	1	0	1	0	1	4	4	4	7.8408	0.974045	0	0	0	3	1	33	22	0	0	0	0
0	17	1	2002	0	18	1	0	0	0	0	4	4	4	7.8408	0.992262	0	0	0	3	2	28	1	0	0	0	0
0	53	1	2002	0	18	1	0	0	0	0	4	4	4	7.8408	0.992262	0	0	1	1	2	66	1	0	0	0	1
0	33	1	2002	0	17	0	0	1	0	0	4	4	4	7.8408	0.99283	0	0	0	2	2	20	1	0	0	0	0
0	49	1	2002	0	18	1	0	0	0	0	4	4	4	7.8408	0.992262	0	0	0	3	2	36	1	0	0	0	1
0	49	1	2002	0	17	1	0	0	0	0	4	4	4	7.8408	0.99283	0	0	0	1	2	49	1	0	0	0	0
0	17	0	2002	0	54	0	0	1	1	0	4	4	3	7.55	0.859547	0	0	0	2	2	26	1	0	1	1	1
0	68	0	2002	1	25	0	0	0	0	0	4	4	4	7.8408	0.917668	0	0	0	2	2	85	4	1	1	0	0
0	64	1	2002	0	17	1	0	0	0	0	4	4	4	7.8408	0.953712	0	0	0	1	2	53	1	0	0	0	0
0	25	0	2002	0	59	1	0	1	1	0	0	2	0	1.4652	0.0123723	0	0	1	1	2	52	1	1	1	1	1
0	72	1	2002	0	17	1	0	0	0	0	4	4	4	7.8408	0.953712	0	0	0	1	2	58	1	0	0	1	0
0	20	0	2002	0	48	1	0	1	1	1	2	2	4	4.502	0.345994	0	0	1	2	2	32	2	1	1	0	1
0	22	1	2002	0	18	1	0	0	0	0	4	4	4	7.8408	0.992262	0	0	1	3	2	20	1	0	0	0	0
0	65	1	2002	0	35	0	0	0	1	1	3	2	4	5.4388	0.343122	0	0	0	1	2	55	3	1	1	1	1
0	50	0	2002	0	17	0	0	1	0	0	4	4	4	7.8408	0.99283	0	0	1	1	2	32	7	0	0	0	0
0	79	0	2002	0	25	1	0	0	0	0	0	4	4	4.0936	0.23771	0	0	1	2	2	30	1	0	0	0	0
0	61	0	2002	0	25	1	0	0	0	0	0	4	4	4.0936	0.23771	0	0	1	1	2	46	2	1	1	1	0
0	73	0	2002	0	38	1	0	1	0	0	3	4	4	6.904	0.626816	0	0	0	1	2	54	1	0	0	0	0
0	50	1	2002	0	38	1	0	1	0	0	1	3	4	4.2978	0.48411	0	0	0	1	2	84	2	1	1	1	1
0	35	1	2002	0	16	0	0	0	0	1	3	4	4	6.904	0.983911	0	0	1	1	2	52	1	0	0	0	0
0	26	1	2002	0	18	1	0	0	0	0	4	4	4	7.8408	0.992262	0	0	1	1	2	23	1	0	0	0	0
0	27	1	2002	0	16	1	0	0	0	0	4	4	4	7.8408	0.993357	0	0	0	1	2	28	1	0	0	0	0
0	39	1	2002	0	21	0	0	1	0	0	4	4	4	7.8408	0.990277	0	0	1	1	2	78	1	0	0	0	0
0	73	1	2002	0	29	1	0	1	0	0	4	4	4	7.8408	0.891279	0	0	1	2	2	48	12	0	0	1	0
0	27	1	2002	0	18	0	0	1	0	0	4	4	4	7.8408	0.992262	0	0	0	2	2	46	10	0	0	0	0
0	16	1	2002	0	45	1	0	1	0	0	0	1	4	1.8958	0.0524675	0	0	0	2	2	18	1	0	1	0	0
0	18	1	2002	0	18	0	0	1	0	1	4	4	4	7.8408	0.992262	0	0	0	1	2	20	1	0	0	0	0
0	52	1	2002	0	25	1	0	0	0	0	4	4	4	7.8408	0.986827	0	0	0	1	2	23	1	0	0	0	0
0	22	0	2002	0	25	0	0	1	1	0	4	4	4	7.8408	0.986827	0	0	0	1	2	36	14	0	0	0	0
0	76	0	2002	0	25	1	0	0	0	1	4	4	4	7.8408	0.917668	0	0	0	1	2	32	1	0	0	0	1
0	61	0	2002	0	22	0	0	1	0	1	4	4	4	7.8408	0.933484	0	0	0	1	2	46	14	0	0	0	1
0	44	1	2002	0	21	0	0	1	0	0	4	4	4	7.8408	0.990277	0	0	0	1	2	70	1	0	0	0	0
0	49	1	2002	0	22	1	0	1	0	0	4	4	4	7.8408	0.989509	0	0	0	2	3	66	1	0	0	0	0
0	68	1	2002	0	21	0	0	1	0	0	4	4	4	7.8408	0.938097	0	0	0	1	3	38	1	0	0	0	0
0	39	1	2002	0	25	0	0	0	0	0	4	4	4	7.8408	0.986827	0	0	1	1	3	23	84	0	1	0	0
0	20	0	2002	0	42	1	0	1	0	0	0	4	2	3.512	0.245871	0	0	0	3	3	24	3	1	1	0	0
0	22	1	2002	0	38	1	0	1	0	0	2	4	4	5.9672	0.821963	0	0	1	3	3	24	8	0	1	0	1
0	78	0	2002	0	16	1	0	0	0	0	4	4	4	7.8408	0.956987	0	0	0	1	3	14	1	0	0	0	0
0	34	1	2002	0	16	1	0	0	0	0	4	4	4	7.8408	0.993357	0	0	1	2	3	21	1	0	0	0	1
0	23	1	2002	0	22	0	0	1	1	0	4	4	4	7.8408	0.989509	0	0	1	1	3	62	1	0	0	0	0
0	82	1	2002	0	27	1	0	0	0	0	0	4	4	4.0936	0.211005	0	0	0	2	3	17	2	1	1	0	0
0	32	1	2002	0	34	0	0	1	1	1	4	4	4	7.8408	0.974045	0	0	0	1	3	32	65	0	0	0	0
0	55	0	2002	0	41	1	0	1	0	1	2	4	4	5.9672	0.352993	0	0	0	2	3	16	22	0	1	0	1
0	77	0	2002	0	20	0	0	1	0	0	4	2	3	6.0848	0.753829	0	0	1	1	3	69	30	0	1	1	0
0	22	1	2002	0	21	0	0	1	0	0	4	4	4	7.8408	0.990277	0	0	1	2	3	86	15	0	0	0	0
0	82	0	2002	0	19	0	0	1	0	1	4	4	4	7.8408	0.946439	0	0	0	1	3	44	1	0	0	0	1
0	65	1	2002	0	20	0	0	1	0	0	4	3	4	7.1082	0.890502	0	0	1	1	3	40	1	0	0	0	0
0	61	1	2002	0	21	0	0	1	0	0	4	4	4	7.8408	0.938097	0	0	1	1	3	65	1	0	0	0	0
0	74	0	2002	0	25	1	0	0	0	0	1	4	4	5.0304	0.432615	0	0	0	1	3	24	2	1	1	0	0
0	79	0	2002	0	19	0	0	1	0	1	4	4	4	7.8408	0.946439	0	0	0	1	3	59	1	0	0	0	0
0	69	1	2002	0	29	0	0	1	0	1	4	4	4	7.8408	0.891279	0	0	0	2	3	22	1	0	0	0	1
0	87	0	2002	0	25	0	0	0	0	0	4	4	4	7.8408	0.917668	0	0	1	2	3	76	19	1	1	0	0
0	68	1	2002	0	16	1	0	0	0	0	4	4	4	7.8408	0.956987	0	0	1	1	3	46	1	0	0	0	0
0	78	0	2002	0	22	0	0	0	1	1	4	4	4	7.8408	0.933484	0	0	0	2	3	50	1	0	0	0	0
0	81	0	2002	0	19	0	0	1	0	1	4	3	4	7.1082	0.897769	0	0	0	3	3	38	20	0	0	0	1
0	65	0	2002	0	26	1	0	0	0	0	4	4	4	7.8408	0.911676	0	0	0	1	3	39	1	0	0	0	0
0	52	1	2002	0	25	1	0	0	0	0	4	4	4	7.8408	0.986827	0	0	1	2	3	86	1	0	0	1	1
0	19	1	2002	0	26	1	0	0	0	0	0	4	4	4.0936	0.659965	0	0	0	1	3	47	1	0	1	1	0
0	19	0	2002	0	26	0	1	0	0	1	2	4	4	5.9672	0.920657	0	0	0	1	3	46	14	0	1	0	0
0	40	0	2002	0	35	0	0	1	1	0	4	2	4	6.3756	0.895658	0	0	0	1	3	66	2	1	0	1	1
0	19	0	2002	0	38	1	0	0	0	1	4	4	4	7.8408	0.965037	0	0	0	1	3	66	42	0	1	1	1
0	69	0	2002	0	17	1	0	0	0	0	4	4	4	7.8408	0.953712	0	0	0	1	3	23	1	0	0	0	0
0	80	1	2002	0	29	0	0	1	1	0	4	4	4	7.8408	0.891279	0	0	0	1	3	29	1	0	0	0	0
0	85	0	2002	0	18	0	0	1	0	1	3	2	4	5.4388	0.658405	0	0	1	2	3	24	1	0	0	0	0
0	68	0	2002	0	22	1	0	0	1	0	3	4	4	6.904	0.851623	0	0	0	2	3	26	1	0	0	0	0
0	39	1	2002	0	17	1	0	0	0	0	4	4	4	7.8408	0.99283	0	0	0	2	3	39	1	0	0	0	0
0	50	1	2002	0	34	1	0	1	0	1	4	4	4	7.8408	0.974045	0	0	0	1	3	27	18	0	0	0	0
0	58	1	2002	0	25	1	0	0	0	0	1	4	4	5.0304	0.432615	0	0	0	1	3	44	4	1	1	1	1
0	44	0	2002	0	21	1	0	0	0	0	3	4	4	6.904	0.976556	0	0	0	1	4	22	1	0	0	0	0
0	24	1	2002	0	27	1	0	0	0	0	4	4	4	7.8408	0.984673	0	0	0	2	4	29	1	0	0	0	1
0	45	0	2002	0	16	0	0	1	0	0	4	4	4	7.8408	0.993357	0	0	0	1	4	47	1	0	0	0	0
0	31	0	2002	0	50	0	0	1	1	1	2	1	4	3.7694	0.183998	0	0	0	1	4	25	45	0	1	0	1
0	75	1	2002	0	17	1	0	0	0	0	4	3	4	7.1082	0.91103	0	0	1	2	4	22	1	0	0	0	0
0	73	1	2002	0	26	1	0	0	0	0	1	4	3	4.7396	0.348525	0	0	0	3	4	21	1	0	0	0	0
0	86	0	2002	0	25	0	0	0	0	0	2	4	4	5.9672	0.650878	0	0	0	2	4	43	4	1	0	0	0
0	60	0	2002	0	36	0	0	1	1	0	4	4	4	7.8408	0.827251	0	0	0	2	4	51	46	0	0	0	0
0	75	1	2002	0	16	1	0	0	0	0	4	4	4	7.8408	0.956987	2	0	1	1	4	24	1	0	0	0	0
0	46	0	2002	0	29	0	0	1	0	1	2	4	3	5.6764	0.874722	0	0	1	2	4	59	22	0	0	0	0
0	25	1	2003	0	29	0	0	1	1	0	3	4	3	6.6132	0.944667	0	0	0	1	4	29	1	0	0	0	0
0	30	1	2003	0	21	1	0	0	0	0	4	4	4	7.8408	0.990277	0	0	0	3	4	80	1	0	0	0	0
0	65	1	2003	0	29	0	0	1	1	0	4	4	4	7.8408	0.891279	0	0	0	1	4	47	6	0	1	1	1
1	61	1	2003	0	75	0	0	0	0	0	3	4	4	6.904	0.0892329	0	0	1	3	4	31	2	1	1	0	0
0	71	1	2003	0	27	1	0	0	0	0	2	4	4	5.9672	0.615218	1	0	0	2	4	46	6	1	1	1	0
0	66	1	2003	0	16	1	0	0	0	0	4	4	4	7.8408	0.956987	0	0	0	3	4	24	1	0	0	0	0
0	84	1	2003	0	16	1	0	0	0	0	4	4	4	7.8408	0.956987	0	0	0	2	4	23	1	0	0	0	0
0	68	0	2003	0	29	1	0	0	0	0	1	4	4	5.0304	0.359303	0	0	0	2	4	23	2	1	1	0	1
0	71	1	2003	0	16	1	0	0	0	0	4	4	4	7.8408	0.956987	1	0	0	1	4	55	1	0	0	0	0
0	61	1	2003	0	17	1	0	0	0	0	4	4	4	7.8408	0.953712	0	0	0	1	4	20	1	0	0	0	0
0	33	0	2003	0	30	1	0	0	0	0	2	4	4	5.9672	0.895117	0	0	0	3	4	32	1	0	0	1	0
0	35	1	2003	0	19	1	0	0	0	1	3	4	4	6.904	0.979826	0	0	1	1	1	28	1	0	0	0	1
0	67	0	2003	0	16	1	0	0	0	0	4	4	4	7.8408	0.956987	0	0	0	2	1	14	1	0	0	0	0
0	26	1	2003	0	22	0	0	1	0	1	4	4	4	7.8408	0.989509	0	0	0	2	1	58	1	0	0	1	1
0	56	1	2003	0	32	0	0	0	1	1	1	2	4	3.5652	0.0991069	0	0	0	1	1	61	1	0	1	1	1
0	65	1	2003	0	16	0	0	0	0	0	4	4	4	7.8408	0.956987	0	0	0	1	1	34	73	0	0	0	0
0	56	1	2003	0	18	0	0	1	0	1	4	4	4	7.8408	0.950201	0	0	0	1	1	36	1	0	0	0	1
0	69	1	2003	0	18	0	0	1	0	1	4	4	4	7.8408	0.950201	0	0	0	1	1	27	1	0	0	0	0
0	44	1	2003	0	25	0	0	0	0	0	4	4	4	7.8408	0.986827	0	0	0	3	1	58	2	1	1	0	0
0	68	1	2003	0	25	1	0	0	0	0	1	4	2	4.4488	0.304434	0	0	0	1	1	32	3	1	1	0	0
0	17	1	2003	0	18	1	0	0	0	0	3	4	4	6.904	0.98129	0	0	0	3	1	27	1	0	0	0	0
0	66	1	2003	0	24	1	0	0	0	0	3	4	4	6.904	0.831148	0	0	0	1	1	53	1	0	0	0	0
0	75	1	2003	0	26	1	0	0	0	0	1	4	4	5.0304	0.41387	0	0	0	1	1	33	3	1	1	0	0
0	68	0	2003	0	16	1	0	0	0	0	4	4	4	7.8408	0.956987	0	0	1	2	1	24	1	0	0	0	0
0	85	0	2003	0	22	0	1	1	0	0	4	4	4	7.8408	0.933484	0	0	1	1	1	43	8	0	0	0	1
0	17	1	2003	0	38	1	0	1	0	0	1	4	4	5.0304	0.653762	0	0	0	3	1	72	1	0	1	1	0
0	57	1	2003	0	19	1	1	0	0	0	3	4	4	6.904	0.878445	0	0	0	3	1	43	1	0	0	0	0
0	19	1	2003	0	25	0	0	0	0	0	4	4	4	7.8408	0.986827	0	0	0	1	1	28	48	0	1	1	0
0	69	0	2003	0	16	1	0	0	0	0	4	4	4	7.8408	0.956987	0	0	1	2	1	32	1	0	0	0	0
0	77	1	2003	0	19	1	0	0	1	0	4	4	4	7.8408	0.946439	0	0	0	1	1	59	1	0	0	0	1
0	20	1	2003	0	16	1	0	0	0	0	4	4	4	7.8408	0.993357	0	0	0	3	1	58	1	0	0	0	0
0	76	1	2003	0	16	1	0	0	0	0	2	4	4	5.9672	0.788199	0	0	1	1	1	94	1	0	0	0	0
0	26	0	2003	0	20	0	0	1	0	0	3	4	4	6.904	0.978251	0	0	0	3	1	40	1	0	0	0	0
0	23	1	2003	0	26	0	0	1	1	0	3	4	4	6.904	0.965954	0	0	1	3	1	23	1	0	0	0	0
0	52	1	2003	0	17	0	0	0	1	0	4	4	4	7.8408	0.99283	0	0	0	2	1	39	1	0	0	0	1
0	43	1	2003	0	20	1	0	0	0	0	4	4	4	7.8408	0.990989	0	0	1	3	1	21	1	0	0	0	0
0	68	0	2003	0	17	0	0	1	0	0	4	4	4	7.8408	0.953712	0	0	0	1	1	38	19	0	0	0	1
0	18	1	2003	0	24	1	0	0	0	0	4	4	4	7.8408	0.987788	0	0	1	2	2	20	1	0	0	0	0
0	77	1	2003	0	21	1	0	0	0	0	2	4	4	5.9672	0.717096	0	0	0	1	2	61	1	0	0	1	0
0	30	1	2003	0	34	0	0	1	1	1	2	4	4	5.9672	0.862583	0	0	0	3	2	83	14	0	1	1	1
0	43	1	2003	0	41	0	0	1	1	1	4	4	4	7.8408	0.956373	0	0	0	1	2	29	63	0	1	0	1
0	77	1	2003	0	16	1	0	0	0	0	4	4	4	7.8408	0.956987	0	0	1	1	2	56	1	0	0	0	0
0	21	1	2003	0	19	1	1	0	0	0	1	4	4	5.0304	0.890399	0	0	0	3	2	32	17	1	0	1	0
0	21	1	2003	0	19	0	0	1	0	1	4	4	4	7.8408	0.99165	0	0	0	3	2	50	6	0	0	0	1
1	66	1	2003	0	75	0	0	0	0	0	3	4	3	6.6132	0.0691011	0	0	0	3	2	40	2	1	1	0	0
1	75	1	2003	0	75	0	0	0	0	0	4	4	4	7.8408	0.193262	0	0	0	3	2	21	2	1	1	0	0
0	52	1	2003	0	24	0	0	1	0	0	4	4	4	7.8408	0.987788	0	0	0	1	2	18	1	0	0	0	0
0	35	1	2003	0	29	0	0	1	0	1	4	4	4	7.8408	0.982174	0	0	0	3	2	43	1	0	0	1	1
0	20	1	2003	0	16	1	0	0	0	0	2	4	4	5.9672	0.961555	0	0	1	1	2	28	1	0	0	0	0
0	58	0	2003	0	17	0	0	1	0	0	4	4	4	7.8408	0.953712	0	0	1	3	2	32	1	0	0	0	0
0	17	1	2003	0	29	0	0	1	0	1	4	4	4	7.8408	0.982174	0	0	0	2	2	22	1	0	0	0	1
0	81	1	2003	0	16	1	0	0	0	0	4	4	4	7.8408	0.956987	0	0	0	1	2	32	1	0	0	0	0
0	38	1	2003	0	34	0	0	1	0	0	4	4	4	7.8408	0.974045	0	0	0	2	2	39	3	1	1	0	0
0	42	1	2003	0	19	0	0	1	1	0	4	2	4	6.3756	0.967032	0	0	0	2	2	29	1	0	0	0	1
0	27	1	2003	0	16	0	0	1	0	0	4	4	4	7.8408	0.993357	0	0	0	1	2	32	1	0	0	0	1
0	26	1	2003	0	17	0	0	0	0	1	4	4	4	7.8408	0.99283	0	0	0	2	2	33	1	0	0	0	1
1	47	1	2003	0	25	0	0	0	0	0	1	4	4	5.0304	0.83672	0	0	0	3	2	14	7	1	1	0	0
0	43	1	2003	0	25	0	0	0	0	1	1	2	3	3.2744	0.489523	0	0	0	2	2	117	21	0	1	1	1
0	46	0	2003	0	26	1	0	0	0	1	4	4	4	7.8408	0.98579	0	0	0	2	2	62	1	0	0	0	1
0	56	1	2003	0	22	0	0	1	0	1	4	4	3	7.55	0.914036	0	0	1	1	2	42	29	0	0	0	1
0	69	1	2003	0	17	1	0	0	0	0	4	4	4	7.8408	0.953712	0	0	1	3	2	16	1	1	0	0	0
0	52	1	2003	0	19	0	0	1	1	0	3	4	4	6.904	0.979826	0	0	1	3	2	31	25	0	0	0	0
0	90	1	2003	0	16	1	0	0	0	0	4	4	4	7.8408	0.956987	0	0	0	3	2	23	1	0	0	0	0
1	23	1	2003	0	25	0	0	0	0	0	4	4	4	7.8408	0.986827	2	0	0	2	2	24	30	1	1	0	0
0	39	1	2003	0	34	1	0	1	1	1	3	4	4	6.904	0.938831	0	0	0	1	2	43	1	0	0	0	1
0	67	0	2003	0	17	1	0	0	0	0	4	4	4	7.8408	0.953712	0	0	0	1	2	30	1	0	0	0	0
0	57	1	2003	0	26	1	0	0	0	0	2	4	4	5.9672	0.63323	1	0	0	2	2	29	1	0	1	1	0
0	16	1	2003	0	17	0	0	1	0	0	4	4	4	7.8408	0.99283	0	0	0	2	3	22	13	0	0	0	0
0	39	0	2003	0	29	0	0	1	1	0	4	4	4	7.8408	0.982174	0	0	0	1	3	31	10	0	0	0	1
0	76	0	2003	0	27	1	0	1	1	0	4	4	4	7.8408	0.905293	0	0	0	3	3	22	1	0	0	0	0
0	88	1	2003	0	17	1	0	0	0	0	3	4	4	6.904	0.893917	0	0	0	1	3	19	1	0	0	0	0
0	66	1	2003	0	25	1	0	0	0	0	1	3	4	4.2978	0.274804	0	0	0	1	3	71	64	0	1	1	0
0	49	1	2003	0	26	1	0	0	0	0	4	4	4	7.8408	0.98579	0	0	0	2	3	25	1	0	0	0	0
0	57	1	2003	0	19	0	0	0	1	1	4	3	4	7.1082	0.897769	0	0	0	1	3	72	15	0	0	1	1
0	27	1	2003	0	45	1	0	1	0	0	2	4	4	5.9672	0.729503	0	0	0	3	3	21	1	0	1	0	0
0	74	1	2003	0	41	1	0	1	0	0	1	4	4	5.0304	0.182426	0	0	0	2	3	75	1	0	0	1	0
0	52	1	2003	0	43	1	1	1	0	1	0	2	3	2.3376	0.0896097	0	0	0	1	3	47	2	1	1	1	0
0	75	1	2003	0	16	1	0	0	0	0	4	4	4	7.8408	0.956987	1	1	1	1	3	20	1	0	0	0	0
1	50	0	2003	0	24	0	0	1	0	0	3	3	4	6.1714	0.942665	1	1	0	3	3	23	1	0	0	0	0
0	53	1	2003	0	25	1	0	0	0	0	0	4	4	4.0936	0.676982	0	0	1	3	3	28	5	1	0	0	0
0	80	0	2003	0	51	0	0	1	1	0	3	4	3	6.6132	0.319218	0	0	1	1	3	60	1	0	0	1	0
0	75	1	2003	0	20	1	0	0	0	0	4	4	4	7.8408	0.942409	0	0	0	2	3	61	10	1	0	0	0
0	68	1	2003	0	29	1	0	1	0	0	4	4	4	7.8408	0.891279	0	0	0	1	3	33	1	0	0	0	0
0	85	1	2003	0	36	1	0	1	0	0	4	4	4	7.8408	0.827251	0	0	1	2	3	22	103	0	0	0	0
0	73	0	2003	0	41	1	0	1	1	0	1	2	4	3.5652	0.0522331	0	0	0	2	3	37	16	1	1	0	0
1	37	1	2003	0	25	0	0	0	0	0	3	4	4	6.904	0.968391	0	0	0	2	3	52	35	1	1	1	0
0	47	1	2003	0	45	1	0	1	0	0	1	4	4	5.0304	0.524484	0	0	1	3	3	21	1	0	1	0	0
0	58	1	2003	0	43	0	0	1	1	1	4	2	4	6.3756	0.408606	0	0	0	1	3	26	37	0	0	0	1
0	82	1	2003	0	21	1	0	0	0	0	4	4	4	7.8408	0.938097	1	0	0	1	3	48	1	0	0	0	0
0	48	1	2003	0	16	1	0	0	0	0	4	4	4	7.8408	0.993357	0	0	0	1	3	35	1	0	0	0	0
0	19	1	2003	0	17	0	0	1	0	0	4	4	3	7.55	0.990558	0	0	0	1	4	40	1	0	0	1	0
0	18	1	2003	0	17	1	0	0	0	0	4	4	4	7.8408	0.99283	0	0	0	1	4	24	1	0	0	0	0
0	76	0	2003	0	21	1	0	0	0	0	4	4	4	7.8408	0.938097	3	0	0	1	4	35	1	0	0	0	0
0	56	1	2003	0	27	1	0	0	1	1	4	4	4	7.8408	0.905293	0	0	1	3	4	31	15	0	0	1	0
0	68	1	2003	0	29	1	0	0	0	0	1	4	4	5.0304	0.359303	0	0	0	2	4	38	10	1	1	1	0
0	16	0	2003	0	41	1	0	1	0	1	2	4	3	5.6764	0.735316	1	0	0	1	4	58	24	0	0	1	1
1	52	1	2003	0	16	0	0	0	0	0	4	4	4	7.8408	0.993357	1	0	0	2	4	24	5	0	1	0	0
0	89	1	2003	0	16	1	0	0	0	0	3	4	4	6.904	0.900983	0	0	1	2	4	45	1	0	0	0	0
0	27	0	2003	1	32	0	1	1	0	0	4	4	4	7.8408	0.977658	0	0	0	2	4	15	1	0	0	0	1
0	67	1	2004	0	18	0	0	1	0	0	4	4	4	7.8408	0.950201	0	0	1	1	4	25	14	0	0	0	0
0	50	1	2004	0	38	1	0	1	0	0	3	4	4	6.904	0.918624	0	0	1	2	4	33	1	0	0	0	1
0	71	0	2004	0	26	0	0	1	0	0	4	4	4	7.8408	0.911676	1	1	0	2	4	26	24	0	0	0	0
0	69	1	2004	0	25	0	0	0	1	1	4	4	4	7.8408	0.917668	1	0	1	1	4	52	22	1	0	0	0
0	86	1	2004	0	25	1	0	0	0	0	4	4	4	7.8408	0.917668	0	0	1	2	4	35	1	0	0	0	0
0	68	1	2004	0	25	1	0	0	0	0	3	4	4	6.904	0.820094	0	0	0	3	4	20	1	0	0	0	0
0	50	1	2004	0	29	0	0	1	1	0	4	4	4	7.8408	0.982174	2	0	0	3	4	50	25	0	0	0	0
0	45	1	2004	0	18	0	0	1	0	0	4	4	4	7.8408	0.992262	0	0	0	2	4	68	18	0	0	0	0
0	32	0	2004	0	22	0	0	1	0	1	4	4	4	7.8408	0.989509	0	0	1	3	4	26	1	0	0	0	0
0	40	1	2004	0	22	0	0	1	0	1	4	4	4	7.8408	0.989509	0	0	0	2	4	45	1	0	0	1	0
0	54	1	2004	0	16	1	0	0	0	0	4	4	4	7.8408	0.993357	0	0	0	1	4	22	1	0	0	0	0
0	45	1	2004	0	16	0	0	1	0	0	4	4	4	7.8408	0.993357	0	0	0	3	4	32	14	0	0	0	0
0	82	1	2004	0	17	1	0	0	0	0	4	4	4	7.8408	0.953712	0	0	0	1	4	18	1	0	0	0	0
0	36	1	2004	0	22	0	0	1	0	1	4	4	4	7.8408	0.989509	0	0	0	2	4	74	14	0	0	0	1
0	66	1	2004	0	25	1	0	0	0	0	0	4	0	2.9304	0.0931774	0	0	0	2	4	52	495	0	1	1	0
1	37	1	2004	0	25	0	0	1	0	0	4	4	4	7.8408	0.986827	1	0	0	3	4	48	60	0	1	0	0
0	90	1	2004	0	32	0	0	1	0	0	1	4	2	4.4488	0.203611	0	0	0	2	4	65	3	1	1	1	0
1	22	0	2004	0	27	1	0	1	0	1	3	4	3	6.6132	0.952169	0	0	0	3	4	49	1	0	0	0	1
0	45	1	2004	0	17	0	0	1	0	0	4	4	4	7.8408	0.99283	0	0	0	2	4	18	13	0	0	0	0
0	68	0	2004	0	21	1	0	0	0	0	3	4	4	6.904	0.861068	0	0	1	1	4	26	1	0	0	0	0
0	59	1	2004	0	16	1	0	0	0	0	4	4	4	7.8408	0.956987	0	0	1	1	1	22	1	0	0	0	0
0	21	1	2004	0	36	0	0	1	1	0	4	2	4	6.3756	0.88826	0	0	0	2	1	41	1	0	0	0	1
0	83	1	2004	0	48	1	0	1	0	1	2	4	4	5.9672	0.241676	0	0	0	1	1	29	3	1	1	0	0
0	84	1	2004	0	25	0	0	0	0	0	3	4	3	6.6132	0.775468	1	0	0	2	1	59	3	1	1	1	0
0	51	1	2004	0	16	1	0	0	0	0	3	4	4	6.904	0.983911	0	0	0	2	1	26	1	0	0	0	0
0	68	0	2004	0	26	1	0	0	0	1	2	4	4	5.9672	0.63323	0	0	0	1	1	23	1	1	1	0	0
0	20	0	2004	0	34	1	1	1	0	0	2	4	4	5.9672	0.862583	0	0	0	3	1	27	3	0	0	0	0
0	72	1	2004	0	26	1	0	0	0	0	1	4	4	5.0304	0.41387	2	0	1	2	1	39	8	1	1	0	0
0	33	0	2004	0	26	0	0	1	1	0	4	4	4	7.8408	0.98579	0	0	0	1	1	20	1	0	0	0	1
0	40	1	2004	0	16	0	0	0	0	0	4	4	4	7.8408	0.993357	0	0	0	1	1	35	28	0	0	1	0
0	34	1	2004	0	30	0	0	1	0	0	4	4	4	7.8408	0.980778	0	0	1	1	1	98	1	0	0	1	0
0	64	1	2004	0	16	1	0	0	0	0	4	4	4	7.8408	0.956987	2	0	0	2	1	22	15	1	0	0	0
0	81	1	2004	0	17	1	0	0	0	0	3	4	4	6.904	0.893917	0	0	0	1	1	41	1	0	0	0	0
0	37	1	2004	0	22	1	0	1	0	0	4	4	4	7.8408	0.989509	0	0	0	1	1	32	12	0	0	0	0
0	67	1	2004	0	16	1	0	0	0	0	3	4	4	6.904	0.900983	0	0	1	2	1	22	4	1	0	0	0
0	20	1	2004	0	17	0	0	0	1	0	4	4	4	7.8408	0.99283	0	0	0	1	1	63	1	0	0	0	0
1	29	1	2004	0	75	0	0	0	0	0	4	1	4	5.643	0.165021	1	1	0	2	1	69	3	1	1	1	0
0	72	1	2004	1	26	1	0	0	0	0	2	4	4	5.9672	0.63323	0	0	0	1	1	42	5	1	0	1	0
0	22	1	2004	0	26	0	0	0	0	1	4	4	4	7.8408	0.98579	0	0	0	3	1	53	39	0	1	0	1
0	66	1	2004	0	18	0	0	1	0	0	3	3	3	5.8806	0.746087	0	0	1	2	1	47	4	1	1	0	0
0	45	1	2004	0	25	0	0	0	0	0	4	4	4	7.8408	0.986827	0	0	0	3	1	43	3	1	1	1	0
1	27	0	2004	0	59	1	1	1	0	1	0	4	3	3.8028	0.104441	1	1	0	2	1	30	192	0	1	1	1
0	53	0	2004	0	19	0	0	1	0	1	4	4	4	7.8408	0.99165	0	0	0	2	1	37	39	0	0	0	0
0	54	1	2004	0	18	0	0	0	1	0	4	2	4	6.3756	0.969395	0	0	0	1	1	60	1	0	0	1	1
0	31	1	2004	0	18	0	0	1	0	1	4	2	4	6.3756	0.969395	0	0	0	2	1	92	20	0	0	1	1
0	21	1	2004	0	33	0	0	1	1	0	4	2	4	6.3756	0.909166	0	0	1	1	2	37	24	0	1	0	1
1	30	1	2004	0	50	1	0	1	0	1	0	3	4	3.361	0.132472	0	0	0	1	2	28	1	1	1	0	0
0	51	1	2004	0	29	1	0	1	0	0	4	4	4	7.8408	0.982174	0	0	0	1	2	50	21	0	0	1	0
0	80	0	2004	0	25	0	0	0	0	0	4	4	4	7.8408	0.917668	0	0	1	1	2	43	20	0	0	0	0
0	17	1	2004	0	16	1	0	0	0	0	4	4	4	7.8408	0.993357	0	0	0	1	2	25	1	0	0	0	0
0	53	1	2004	0	27	1	0	0	0	0	4	4	4	7.8408	0.984673	0	0	0	1	2	44	1	0	0	1	1
0	69	0	2004	0	34	1	0	0	0	1	1	4	4	5.0304	0.276399	0	0	0	1	2	72	1	0	1	1	0
0	21	1	2004	0	30	1	0	0	0	0	1	4	3	4.7396	0.725614	0	0	1	1	2	83	1	1	1	1	0
0	66	0	2004	0	18	1	0	0	0	1	4	4	4	7.8408	0.950201	0	0	0	3	2	50	4	0	0	1	1
0	84	1	2004	0	16	1	0	0	0	0	4	4	4	7.8408	0.956987	0	0	1	1	2	28	1	0	0	0	0
0	74	1	2004	0	17	1	0	0	0	0	4	4	4	7.8408	0.953712	9	0	0	1	2	30	13	1	0	0	0
0	68	0	2004	0	41	0	0	1	1	0	4	3	3	6.8174	0.551202	0	0	1	1	2	59	1	0	0	0	1
0	81	0	2004	0	18	1	0	0	0	1	1	4	4	5.0304	0.566213	0	0	0	2	2	57	1	0	0	1	0
0	53	0	2004	0	18	0	0	1	0	0	4	4	4	7.8408	0.992262	0	0	0	1	2	43	10	0	0	0	0
0	54	1	2004	0	22	1	0	1	0	0	4	3	4	7.1082	0.979112	0	0	0	1	2	24	15	0	0	0	1
0	52	1	2004	0	25	1	0	0	0	0	0	4	3	3.8028	0.613582	0	0	0	3	2	46	2	1	1	0	0
0	73	1	2004	0	51	1	0	1	0	0	0	4	4	4.0936	0.0406176	0	0	0	2	2	28	3	1	1	0	0
0	26	1	2004	0	45	1	0	1	0	0	4	3	4	7.1082	0.889051	0	0	1	3	2	62	12	0	0	0	0
0	58	0	2004	0	21	0	0	1	0	0	4	4	4	7.8408	0.938097	0	0	1	1	2	43	6	0	0	0	0
0	19	1	2004	0	35	1	0	1	0	0	1	4	4	5.0304	0.703917	0	0	0	1	2	18	3	1	1	0	1
0	76	1	2004	0	41	1	0	1	0	1	1	4	4	5.0304	0.182426	0	0	0	1	2	47	2	1	1	1	0
0	73	1	2004	0	26	1	0	0	0	0	3	4	4	6.904	0.808484	1	0	0	1	2	65	5	1	1	1	0
0	25	0	2004	0	17	0	0	0	1	0	3	2	4	5.4388	0.93328	0	0	1	3	3	18	1	0	0	0	0
0	70	1	2004	0	17	1	0	0	0	0	4	4	4	7.8408	0.953712	1	0	0	1	3	33	1	0	0	0	0
0	87	1	2004	0	17	1	0	0	0	0	0	4	3	3.8028	0.303981	0	0	0	1	3	21	2	1	1	0	0
0	28	1	2004	0	18	0	0	1	0	1	4	4	4	7.8408	0.992262	0	0	0	1	3	48	12	0	0	0	0
0	84	0	2004	0	17	1	0	0	0	0	1	4	4	5.0304	0.584972	0	0	0	2	3	23	1	0	0	0	0
0	30	0	2004	0	17	0	0	1	0	0	4	4	4	7.8408	0.99283	0	0	0	3	3	29	8	0	0	0	0
0	61	1	2004	0	18	0	0	1	0	0	4	4	4	7.8408	0.950201	0	0	0	2	3	38	4	0	0	0	0
0	42	0	2004	0	19	0	0	1	1	0	4	4	4	7.8408	0.99165	0	0	0	1	3	41	36	0	0	0	0
0	54	1	2004	0	24	0	0	1	0	0	4	4	3	7.55	0.983945	0	0	0	1	3	32	32	0	0	1	0
0	70	1	2004	0	32	1	0	1	0	0	4	4	4	7.8408	0.86686	6	0	1	1	3	67	17	0	0	1	0
0	47	1	2004	0	41	0	0	1	1	1	4	3	4	7.1082	0.915929	0	0	0	3	3	36	34	0	0	1	1
0	71	0	2004	0	25	1	0	0	0	0	4	4	4	7.8408	0.917668	0	0	0	2	3	66	1	0	0	0	0
0	79	1	2004	0	16	1	0	0	0	0	3	4	4	6.904	0.900983	0	0	1	1	3	39	1	0	0	0	0
0	44	1	2004	0	16	0	0	0	1	0	4	4	4	7.8408	0.993357	0	0	1	1	3	80	1	0	0	0	0
0	59	1	2004	0	17	1	0	0	0	0	4	4	4	7.8408	0.953712	0	0	0	3	3	52	7	0	0	0	0
1	21	0	2004	0	22	0	0	1	0	1	4	4	4	7.8408	0.989509	1	1	0	2	3	23	20	0	0	0	1
0	69	1	2004	0	27	1	0	0	0	0	0	4	4	4.0936	0.211005	0	0	1	3	3	22	2	1	0	0	0
1	66	1	2004	0	34	0	0	1	0	0	4	4	4	7.8408	0.848112	0	0	0	3	3	81	15	1	1	1	0
0	77	1	2004	0	38	1	0	1	0	0	1	4	4	5.0304	0.219327	4	0	0	1	3	24	3	1	0	0	0
0	29	1	2004	0	26	0	0	1	0	0	4	4	4	7.8408	0.98579	0	0	0	1	3	24	39	0	0	0	0
0	27	0	2004	0	29	0	0	1	0	1	4	4	4	7.8408	0.982174	0	0	1	2	3	32	28	0	0	0	1
0	44	1	2004	0	25	1	1	0	0	0	4	4	4	7.8408	0.986827	0	0	0	1	3	23	1	0	0	0	0
0	81	1	2004	0	25	1	0	0	0	0	4	3	4	7.1082	0.84708	0	0	1	1	3	48	6	1	0	0	0
0	53	1	2004	0	29	0	0	1	0	1	4	4	3	7.55	0.976605	0	0	0	1	3	80	34	0	0	1	1
0	73	1	2004	0	36	1	0	1	0	0	1	4	4	5.0304	0.246755	1	0	0	2	3	23	47	0	1	0	0
0	19	1	2004	0	27	1	0	1	0	1	3	4	3	6.6132	0.952169	0	0	0	1	4	55	14	0	0	1	1
0	78	0	2004	0	38	0	0	1	0	1	4	2	4	6.3756	0.503568	1	0	1	3	4	27	22	0	0	0	1
0	51	1	2004	0	30	1	0	0	0	0	0	4	3	3.8028	0.519588	0	0	1	3	4	23	125	0	0	0	0
0	53	1	2004	0	24	0	0	1	0	0	4	4	3	7.55	0.983945	0	0	0	3	4	49	28	0	0	0	0
0	84	0	2004	0	25	0	0	0	0	0	4	4	4	7.8408	0.917668	0	0	0	2	4	45	1	0	0	1	0
0	85	0	2004	0	16	1	0	0	0	0	4	4	4	7.8408	0.956987	1	0	0	1	4	26	1	0	0	0	0
0	43	0	2004	0	25	0	0	0	0	0	3	4	3	6.6132	0.958698	0	0	0	3	4	33	9	0	1	0	0
0	94	0	2004	0	16	1	0	0	0	0	4	4	4	7.8408	0.956987	0	0	0	3	4	28	1	0	0	0	0
0	35	1	2004	0	19	0	0	1	1	0	4	4	4	7.8408	0.99165	0	0	0	2	4	36	16	0	0	0	0
0	20	1	2004	0	25	1	0	0	0	1	4	4	4	7.8408	0.986827	0	0	0	1	4	53	10	0	0	0	1
0	90	1	2005	0	16	1	0	0	0	0	4	4	4	7.8408	0.956987	0	0	1	2	4	47	1	0	0	0	0
0	37	0	2005	0	19	1	0	0	0	1	4	4	4	7.8408	0.99165	0	0	0	2	4	97	13	0	0	0	0
0	41	1	2005	0	21	0	0	1	0	0	4	4	4	7.8408	0.990277	0	1	0	1	4	27	8	0	0	0	0
0	45	0	2005	0	17	1	0	0	0	0	2	4	4	5.9672	0.958613	0	0	0	2	4	65	15	1	1	1	0
0	43	1	2005	0	21	1	0	0	0	0	4	4	4	7.8408	0.990277	0	0	0	2	4	50	25	0	0	0	0
0	47	1	2005	0	24	0	0	1	0	0	4	4	3	7.55	0.983945	0	0	0	1	4	81	1	0	0	1	0
0	77	1	2005	0	16	1	0	0	0	0	4	4	4	7.8408	0.956987	0	0	0	2	4	56	1	0	0	0	0
1	41	0	2005	0	48	1	1	1	0	1	1	2	3	3.2744	0.140841	0	0	0	1	4	15	1	1	1	0	0
0	81	1	2005	0	38	0	0	1	0	1	4	4	3	7.55	0.756784	0	0	0	1	4	47	2	1	1	1	0
0	72	0	2005	0	16	1	0	0	0	0	4	4	4	7.8408	0.956987	0	0	0	1	4	22	1	0	0	0	0
0	46	1	2005	0	20	0	0	0	1	0	4	4	3	7.55	0.988141	0	0	0	1	4	49	1	0	0	0	1
0	22	1	2005	0	41	0	0	1	1	1	4	4	4	7.8408	0.956373	0	0	0	3	4	54	18	0	0	1	1
0	64	1	2005	0	21	0	0	1	0	0	4	4	3	7.55	0.919881	0	0	0	1	4	82	20	0	0	1	0
0	19	1	2005	0	34	1	1	1	0	0	2	4	4	5.9672	0.862583	0	0	0	3	1	28	1	0	0	1	0
0	54	0	2005	0	26	0	0	1	1	0	4	3	4	7.1082	0.971813	0	0	0	3	1	26	1	0	0	0	0
0	23	0	2005	0	41	1	0	1	1	0	0	4	2	3.512	0.260388	0	0	0	2	1	16	2	1	1	0	0
0	54	1	2005	0	17	0	0	1	0	0	4	4	4	7.8408	0.99283	0	0	0	2	1	45	3	0	0	1	0
0	58	1	2005	0	26	1	0	0	0	0	0	4	4	4.0936	0.224075	0	0	0	2	1	35	1	0	0	0	0
0	76	1	2005	0	16	1	0	0	0	0	4	4	4	7.8408	0.956987	2	0	0	1	1	22	1	0	0	0	0
0	75	1	2005	0	35	0	0	1	0	1	4	4	4	7.8408	0.837952	1	0	0	1	1	33	10	0	0	0	1
0	63	1	2005	0	18	0	0	1	0	0	4	4	4	7.8408	0.950201	0	0	0	1	1	24	34	0	0	0	0
0	76	0	2005	0	25	0	0	1	0	1	4	4	4	7.8408	0.917668	0	0	1	2	1	40	1	0	0	0	0
0	20	1	2005	0	38	1	0	1	0	0	0	4	3	3.8028	0.369116	0	0	0	3	1	42	2	1	1	1	0
1	49	1	2005	0	18	0	0	1	0	0	4	4	4	7.8408	0.992262	0	0	0	1	1	21	8	0	1	0	0
0	16	0	2005	0	25	0	0	0	0	1	4	2	3	6.0848	0.933414	0	0	0	2	1	54	24	0	1	0	1
0	66	1	2005	0	59	1	0	1	0	1	0	3	2	2.7794	0.00649134	0	0	0	2	1	22	1	1	1	0	0
0	65	1	2005	0	22	0	0	1	0	1	4	4	4	7.8408	0.933484	0	0	0	1	1	52	13	0	0	0	0
0	57	1	2005	0	17	0	0	1	0	0	4	4	4	7.8408	0.953712	0	0	0	1	1	62	1	0	0	1	0
0	49	1	2005	0	21	0	0	1	0	0	4	4	4	7.8408	0.990277	0	0	0	2	1	35	9	0	0	0	0
0	46	1	2005	0	17	0	0	0	0	1	4	4	4	7.8408	0.99283	0	0	0	1	1	37	3	0	0	1	1
0	77	1	2005	0	27	1	0	1	1	1	3	2	4	5.4388	0.491249	1	0	0	1	1	64	29	0	0	1	1
0	39	1	2005	0	21	0	0	1	0	0	4	4	3	7.55	0.987207	0	0	1	2	1	49	27	0	1	1	0
0	54	1	2005	0	16	1	0	0	0	0	4	4	4	7.8408	0.993357	0	0	0	1	1	69	16	0	0	1	0
0	86	1	2005	0	16	1	0	0	0	0	3	4	4	6.904	0.900983	2	0	0	1	1	46	1	0	0	0	0
0	19	1	2005	0	38	1	0	1	0	0	0	4	4	4.0936	0.43574	0	0	1	1	2	41	18	1	1	1	0
0	42	1	2005	0	19	1	0	0	0	1	4	4	4	7.8408	0.99165	0	0	1	3	2	44	1	0	0	1	1
0	18	1	2005	0	16	1	0	0	0	0	4	4	4	7.8408	0.993357	0	0	0	1	2	30	2	0	0	0	0
0	53	1	2005	0	26	0	0	0	1	0	3	2	4	5.4388	0.87512	0	0	0	3	2	24	2	1	0	0	1
0	19	1	2005	0	22	0	0	1	0	1	4	4	4	7.8408	0.989509	0	0	0	3	2	106	1	0	0	1	0
0	45	1	2005	0	41	1	0	1	0	0	4	4	4	7.8408	0.956373	0	0	1	1	2	86	1	0	0	1	0
0	62	1	2005	0	16	1	0	0	0	0	4	4	4	7.8408	0.956987	0	0	0	1	2	20	1	0	0	0	0
0	73	1	2005	0	16	1	0	0	0	0	4	4	4	7.8408	0.956987	1	0	1	2	2	27	1	0	0	0	0
0	22	1	2005	0	33	1	0	0	0	0	3	4	4	6.904	0.943096	0	0	1	3	2	33	54	0	1	0	0
0	23	1	2005	0	51	0	0	1	1	0	4	4	4	7.8408	0.910477	0	0	0	1	2	34	8	0	0	0	1
0	63	0	2005	0	57	0	0	1	1	1	4	2	3	6.0848	0.151552	0	0	0	2	2	49	3	0	1	0	1
0	22	1	2005	0	26	1	0	0	0	0	2	4	4	5.9672	0.920657	0	0	1	3	2	55	1	0	1	0	1
0	74	1	2005	0	20	1	0	0	0	0	4	4	4	7.8408	0.942409	0	0	0	2	2	72	1	0	0	0	0
0	52	1	2005	0	21	1	0	0	0	0	4	4	4	7.8408	0.990277	0	0	0	1	2	30	1	0	0	0	0
0	47	1	2005	0	41	0	0	1	1	0	4	4	3	7.55	0.943211	0	0	0	1	2	41	21	1	0	0	1
0	38	1	2005	0	17	1	0	0	0	0	4	4	4	7.8408	0.99283	4	0	1	3	2	49	1	0	0	0	0
0	54	1	2005	0	24	0	0	1	0	0	4	4	4	7.8408	0.987788	0	0	0	1	2	40	1	0	0	0	0
0	56	1	2005	0	34	1	0	1	1	0	4	4	3	7.55	0.808815	4	0	0	1	2	36	89	0	1	0	0
0	79	1	2005	0	25	0	0	1	1	0	4	4	4	7.8408	0.917668	0	0	0	3	2	56	1	0	0	0	1
0	62	0	2005	0	20	0	0	1	0	0	4	4	4	7.8408	0.942409	0	0	1	1	2	37	1	0	0	0	0
0	79	1	2005	0	16	1	0	0	0	0	4	4	4	7.8408	0.956987	0	0	0	3	2	55	1	0	0	0	0
1	23	1	2005	0	75	0	0	1	0	0	0	1	3	1.605	0.00417181	0	0	0	3	2	22	2	1	1	0	0
0	59	0	2005	0	36	1	0	1	0	0	3	4	4	6.904	0.661992	0	0	0	1	2	78	1	0	0	1	0
0	67	1	2005	0	16	1	0	0	0	0	4	4	4	7.8408	0.956987	0	0	0	3	2	61	1	0	0	0	0
0	53	1	2005	0	30	1	0	0	0	0	1	4	4	5.0304	0.777304	0	0	0	3	2	50	1	0	1	1	0
0	52	1	2005	0	22	0	0	1	1	0	4	4	4	7.8408	0.989509	0	0	1	1	2	75	14	0	0	1	1
0	54	0	2005	0	33	1	0	0	0	0	0	1	3	1.605	0.0953837	0	0	1	1	2	49	1	0	1	1	0
0	68	1	2005	0	26	1	0	0	0	0	4	4	4	7.8408	0.911676	0	0	0	1	2	25	1	0	0	0	0
0	20	1	2005	0	26	0	0	1	0	1	4	4	4	7.8408	0.98579	0	0	0	3	2	46	19	0	0	0	0
0	18	1	2005	0	43	0	0	1	1	1	4	4	3	7.55	0.934401	0	0	0	1	2	27	33	0	1	1	1
0	56	1	2005	0	30	1	0	0	0	0	1	4	4	5.0304	0.341821	0	0	1	2	2	43	7	1	1	1	0
0	60	1	2005	0	17	1	0	0	0	0	4	4	4	7.8408	0.953712	1	0	0	3	2	23	1	0	0	0	0
0	74	1	2005	0	21	0	0	1	0	0	4	4	3	7.55	0.919881	0	0	0	1	2	25	39	0	0	0	0
0	19	1	2005	0	34	0	0	1	1	1	4	4	4	7.8408	0.974045	0	0	0	2	2	55	12	0	1	1	1
0	27	1	2005	0	26	0	0	1	0	0	4	2	3	6.0848	0.928479	0	0	0	2	2	48	1	0	0	0	0
0	64	1	2005	0	17	1	0	0	0	0	4	4	4	7.8408	0.953712	0	0	0	1	3	56	1	0	0	0	0
0	16	0	2005	0	17	1	0	0	0	0	0	4	4	4.0936	0.794838	0	0	0	2	3	15	9	1	1	0	0
0	71	1	2005	0	34	1	1	0	0	1	4	4	4	7.8408	0.848112	1	0	0	2	3	65	33	0	0	0	0
0	80	0	2005	0	50	1	0	1	0	1	4	4	4	7.8408	0.620357	0	0	0	2	3	55	60	0	1	0	1
0	54	0	2005	0	17	1	0	0	0	0	3	4	4	6.904	0.982649	1	0	1	1	3	80	6	1	0	1	0
0	85	1	2005	0	16	1	0	0	0	0	4	4	4	7.8408	0.956987	0	0	1	1	3	62	1	0	0	0	0
0	50	1	2005	0	17	0	0	1	0	0	4	4	3	7.55	0.990558	0	0	0	3	3	83	25	0	0	1	0
0	65	1	2005	0	17	0	0	1	0	0	4	4	4	7.8408	0.953712	0	0	0	1	3	24	27	0	0	0	0
0	79	0	2005	0	33	1	0	1	0	0	1	4	3	4.7396	0.238098	0	0	0	1	3	69	43	0	0	1	0
0	49	1	2005	0	29	1	0	0	0	0	4	4	4	7.8408	0.982174	0	0	1	1	3	39	8	1	1	0	0
0	58	1	2005	0	16	0	0	1	0	0	4	4	4	7.8408	0.956987	0	0	0	2	3	46	1	0	0	0	0
0	57	0	2005	0	19	0	0	1	1	0	4	4	4	7.8408	0.946439	0	0	0	3	3	28	1	0	0	0	0
0	72	1	2005	0	26	1	0	0	0	1	4	4	4	7.8408	0.911676	0	0	0	1	3	60	19	0	0	1	1
0	73	0	2005	0	25	1	0	0	0	1	4	4	4	7.8408	0.917668	0	0	0	2	3	21	9	0	0	0	1
1	53	1	2005	0	75	0	0	1	0	0	3	4	3	6.6132	0.33284	1	0	1	2	3	79	3	1	1	1	0
0	20	1	2005	0	26	0	0	1	0	1	4	4	4	7.8408	0.98579	0	0	0	2	3	109	13	0	0	1	0
0	75	1	2005	0	16	1	0	0	0	0	4	4	4	7.8408	0.956987	0	0	1	2	3	28	1	0	0	0	0
0	56	1	2005	0	17	0	0	1	0	0	4	4	4	7.8408	0.953712	0	0	1	2	3	21	193	0	1	1	0
0	62	1	2005	0	17	0	0	1	0	0	4	4	4	7.8408	0.953712	0	0	0	1	3	61	1	0	0	0	0
0	74	1	2005	0	17	1	0	0	0	0	4	2	4	6.3756	0.83577	0	0	0	1	3	51	1	0	0	0	0
0	42	1	2005	0	26	1	0	1	0	0	3	4	4	6.904	0.965954	0	0	1	3	3	34	5	0	0	0	0
0	77	1	2005	0	18	0	0	1	0	0	4	4	4	7.8408	0.950201	2	0	0	1	3	53	1	0	0	0	0
0	67	0	2005	0	30	1	0	0	0	0	0	4	4	4.0936	0.17519	0	0	0	2	3	33	1	1	1	1	0
0	70	1	2005	0	16	0	0	0	0	0	1	4	3	4.7396	0.535559	0	0	0	1	3	42	7	0	1	0	0
0	68	1	2005	0	16	1	0	0	0	0	4	4	4	7.8408	0.956987	0	0	1	1	3	27	1	0	0	0	0
0	65	0	2005	0	30	1	0	0	0	0	1	2	2	2.9836	0.0685825	0	0	1	2	3	69	2	1	1	1	0
0	79	1	2005	0	34	1	0	1	1	0	3	4	4	6.904	0.695463	0	0	1	3	3	21	2	1	1	0	1
0	67	1	2005	0	66	1	0	1	0	1	1	4	3	4.7396	0.0241848	0	0	0	2	3	19	3	1	1	0	1
0	71	0	2005	0	34	0	0	1	0	0	4	4	4	7.8408	0.848112	0	0	0	3	3	26	1	0	1	0	0
0	58	0	2005	0	42	0	0	1	0	1	4	2	3	6.0848	0.361128	0	0	0	3	3	29	1	0	0	0	1
0	69	1	2005	0	17	1	0	0	0	0	4	4	4	7.8408	0.953712	0	0	0	1	3	36	4	0	0	0	0
1	67	1	2005	0	34	0	0	1	0	0	4	4	4	7.8408	0.848112	1	0	0	1	3	29	60	0	1	0	0
0	52	1	2005	0	21	1	0	0	0	0	4	4	4	7.8408	0.990277	0	0	0	1	3	67	1	0	0	1	0
0	68	1	2005	0	38	1	0	1	0	0	1	4	4	5.0304	0.219327	0	0	1	1	3	61	2	1	1	1	0
0	33	1	2005	0	19	1	0	0	0	1	4	4	4	7.8408	0.99165	0	0	1	1	3	33	1	0	0	0	0
0	63	1	2005	0	26	1	0	0	0	0	4	4	4	7.8408	0.911676	1	0	0	1	3	20	9	1	0	0	0
0	87	0	2005	0	50	1	0	1	0	1	4	4	4	7.8408	0.620357	0	0	0	2	3	24	2	1	1	0	1
0	57	1	2005	0	16	1	0	0	0	0	4	4	4	7.8408	0.956987	0	0	0	1	4	19	1	0	0	0	0
0	76	1	2005	0	59	1	0	1	0	1	1	4	4	5.0304	0.0530302	0	0	0	1	4	23	2	1	0	0	1
0	66	0	2005	0	21	0	0	1	0	0	4	4	4	7.8408	0.938097	0	0	0	1	4	41	11	0	0	0	0
0	75	1	2005	0	34	1	0	1	0	1	4	4	4	7.8408	0.848112	0	0	0	2	4	70	3	1	1	1	1
0	61	0	2005	0	45	1	0	1	0	0	0	3	4	3.361	0.0322803	0	0	1	3	4	17	1	0	1	0	1
0	67	1	2005	0	16	1	0	0	0	0	4	4	4	7.8408	0.956987	0	0	0	2	4	30	1	0	0	0	0
0	58	1	2005	0	16	1	0	0	0	0	4	4	4	7.8408	0.956987	0	0	0	1	4	26	1	0	1	0	0
0	18	0	2005	0	22	1	0	1	0	0	4	4	4	7.8408	0.989509	0	0	0	3	4	39	9	0	0	0	0
0	65	1	2005	0	17	1	0	0	0	0	4	4	4	7.8408	0.953712	1	0	0	2	4	43	70	1	0	1	0
0	72	0	2005	0	38	1	0	1	0	0	2	4	3	5.6764	0.342303	0	0	0	2	4	85	112	0	1	1	0
0	69	1	2006	0	41	1	0	1	0	1	4	4	4	7.8408	0.765355	0	0	0	2	4	44	95	0	0	1	0
0	70	1	2006	0	45	1	0	1	0	0	1	4	4	5.0304	0.140977	0	0	0	1	4	54	1	0	1	1	1
0	67	1	2006	0	16	1	0	0	0	0	3	4	4	6.904	0.900983	0	0	0	2	4	29	1	0	0	0	0
0	83	0	2006	0	38	1	0	0	0	1	1	4	4	5.0304	0.219327	0	0	1	2	4	21	1	1	1	1	0
0	76	1	2006	0	16	1	0	0	0	0	4	4	4	7.8408	0.956987	0	0	1	1	4	72	1	0	0	0	0
0	60	1	2006	0	25	1	1	0	0	0	4	4	4	7.8408	0.917668	0	0	0	1	4	28	1	0	0	0	0
0	56	1	2006	0	17	0	0	1	0	0	4	4	4	7.8408	0.953712	0	0	0	2	4	28	4	0	0	0	0
0	65	1	2006	0	26	0	0	1	0	1	4	4	4	7.8408	0.911676	0	0	0	3	4	78	24	0	0	1	0
0	66	1	2006	0	16	1	0	0	0	0	4	4	4	7.8408	0.956987	0	0	0	2	4	52	1	0	0	0	0
0	52	1	2006	0	19	1	0	1	0	0	4	4	4	7.8408	0.99165	1	1	0	2	4	30	18	0	0	0	0
0	68	1	2006	0	17	1	0	0	0	0	4	4	4	7.8408	0.953712	0	0	0	2	4	59	1	0	0	0	0
0	33	1	2006	0	16	0	0	0	0	1	4	4	4	7.8408	0.993357	0	0	1	1	4	30	1	0	0	0	1
0	26	1	2006	0	38	0	0	1	0	1	2	4	3	5.6764	0.777674	0	0	1	1	4	23	4	1	1	0	0
0	83	1	2006	0	29	1	0	0	0	0	4	4	4	7.8408	0.891279	0	0	0	1	4	63	1	0	0	0	0
0	27	1	2006	0	50	1	0	1	0	1	2	2	3	4.2112	0.255814	0	0	0	3	4	25	23	0	1	0	1
0	22	1	2006	0	17	0	0	1	0	0	4	4	4	7.8408	0.99283	0	0	0	1	4	62	1	0	0	0	0
1	57	0	2006	0	18	0	0	0	1	1	4	4	3	7.55	0.935302	1	1	0	1	4	26	1	0	0	0	1
0	63	1	2006	0	75	1	0	0	0	0	0	0	0	0	0.000134709	0	0	1	1	4	85	1	1	0	1	0
0	50	1	2006	0	26	1	0	0	0	0	1	4	4	5.0304	0.825955	0	0	1	2	4	54	1	0	1	0	0
0	22	1	2006	0	29	0	0	1	0	1	4	4	4	7.8408	0.982174	0	0	0	3	4	33	16	0	0	0	1
0	66	1	2006	0	57	1	0	1	1	0	2	4	4	5.9672	0.137677	0	0	0	1	1	41	51	0	1	0	1
0	48	1	2006	0	36	1	0	1	0	0	2	2	2	3.9204	0.432865	0	0	1	1	1	75	20	0	1	1	0
0	51	1	2006	0	22	0	0	1	0	1	1	4	4	5.0304	0.865812	0	0	0	1	1	56	22	0	1	1	1
0	58	0	2006	0	38	0	0	1	0	1	4	4	4	7.8408	0.804187	0	0	1	3	1	50	27	0	1	0	1
0	55	1	2006	0	25	1	0	0	0	0	2	4	4	5.9672	0.650878	2	0	0	1	1	26	1	0	1	0	0
0	70	0	2006	0	41	1	0	1	0	0	4	4	3	7.55	0.71192	3	0	1	1	1	31	63	0	1	0	0
0	28	1	2006	0	19	0	0	1	0	1	4	4	4	7.8408	0.99165	0	0	0	2	1	90	7	0	0	1	0
0	18	1	2006	0	22	1	0	1	0	0	3	4	4	6.904	0.974731	0	0	0	3	1	23	1	0	1	0	0
1	26	1	2006	1	19	0	0	1	1	0	4	4	4	7.8408	0.99165	0	0	0	3	1	36	1	0	0	0	1
1	63	0	2006	0	25	0	0	0	0	0	4	4	4	7.8408	0.917668	1	1	0	1	1	19	40	1	1	0	0
0	17	0	2006	0	19	0	0	1	0	1	4	4	4	7.8408	0.99165	0	0	0	3	1	70	1	0	0	0	0
0	77	0	2006	0	18	0	0	1	0	1	4	4	4	7.8408	0.950201	0	0	1	2	1	27	11	0	0	0	0
0	32	1	2006	0	21	0	0	1	0	0	4	4	4	7.8408	0.990277	0	0	1	1	1	44	8	0	0	0	0
0	51	1	2006	0	36	1	0	1	0	0	2	4	4	5.9672	0.843342	0	0	0	1	1	27	1	0	0	0	0
0	30	1	2006	0	18	0	0	1	0	0	4	4	3	7.55	0.989812	0	0	0	3	1	43	3	0	0	0	0
0	18	1	2006	0	34	1	0	1	1	1	0	3	4	3.361	0.342885	0	0	1	3	1	71	19	0	1	0	1
0	63	1	2006	0	38	1	0	1	0	0	2	4	2	5.3856	0.282805	0	0	0	2	1	58	2	1	1	1	0
0	56	1	2006	0	29	1	0	1	0	0	2	4	4	5.9672	0.578275	0	0	1	3	1	21	56	0	1	0	0
1	53	1	2006	0	75	0	0	0	0	0	0	0	0	0	0.00090466	0	0	1	1	1	15	1	1	0	1	0
0	63	1	2006	0	16	1	0	0	0	0	3	4	4	6.904	0.900983	0	0	0	1	1	71	10	1	0	1	0
0	56	0	2006	0	22	0	0	1	0	1	4	4	4	7.8408	0.933484	0	0	0	2	1	33	1	0	0	0	1
0	69	1	2006	0	17	1	0	0	0	0	3	4	4	6.904	0.893917	0	0	1	1	1	24	1	0	0	0	0
0	41	1	2006	0	21	0	0	0	1	0	4	4	4	7.8408	0.990277	0	0	1	2	1	53	5	0	0	0	1
0	39	1	2006	0	17	0	0	1	0	0	4	4	4	7.8408	0.99283	0	0	0	2	1	67	10	0	0	0	0
0	31	1	2006	0	38	1	0	1	0	0	3	4	4	6.904	0.918624	0	0	0	1	1	72	1	0	1	1	0
0	56	1	2006	0	34	1	0	1	0	1	4	4	4	7.8408	0.848112	0	0	0	3	1	83	8	0	0	1	1
0	72	1	2006	0	25	1	0	0	1	0	4	4	3	7.55	0.89412	0	0	1	1	1	26	1	0	0	0	1
0	69	1	2006	0	32	0	0	1	0	0	4	4	4	7.8408	0.86686	0	0	1	3	1	44	24	0	1	0	0
0	55	0	2006	0	29	1	0	0	0	0	4	4	4	7.8408	0.891279	0	0	0	3	1	24	1	0	0	0	0
0	57	1	2006	0	17	1	0	0	0	0	4	4	4	7.8408	0.953712	0	0	0	1	1	33	1	0	0	0	0
0	84	0	2006	0	25	0	0	0	0	0	4	4	4	7.8408	0.917668	0	0	0	2	2	68	36	1	1	1	1
1	26	1	2006	0	25	0	0	0	0	0	4	4	4	7.8408	0.986827	0	0	0	2	2	40	12	1	1	0	0
0	61	1	2006	0	26	1	0	0	0	0	0	4	4	4.0936	0.224075	0	0	0	3	2	17	1	0	0	0	0
0	67	1	2006	0	20	1	0	0	0	0	4	4	4	7.8408	0.942409	3	0	0	1	2	42	1	0	0	0	0
0	75	1	2006	0	16	1	0	0	0	0	4	4	4	7.8408	0.956987	0	0	1	2	2	376	1	0	0	1	0
0	53	0	2006	0	50	1	0	1	1	0	4	2	4	6.3756	0.730641	0	0	1	2	2	41	12	0	0	0	1
0	69	0	2006	0	29	1	0	0	0	0	4	4	4	7.8408	0.891279	0	0	0	1	2	25	1	0	0	0	0
0	62	1	2006	0	75	0	0	1	0	0	1	4	4	5.0304	0.0161236	1	0	0	1	2	26	5	1	1	0	0
0	49	1	2006	0	24	0	0	1	0	0	4	4	4	7.8408	0.987788	0	0	0	2	2	44	1	0	0	0	0
0	84	0	2006	0	16	1	0	0	0	0	4	4	4	7.8408	0.956987	0	0	0	1	2	36	1	0	0	0	0
0	23	1	2006	0	19	1	0	0	0	1	4	4	4	7.8408	0.99165	0	0	0	1	2	64	16	0	0	1	0
0	70	0	2006	0	42	1	0	1	0	0	2	4	4	5.9672	0.335657	0	0	0	1	2	17	3	1	1	0	0
0	30	1	2006	0	16	1	0	0	0	0	4	4	4	7.8408	0.993357	0	0	0	1	2	30	1	0	0	0	0
0	35	0	2006	0	19	0	0	1	1	0	4	3	4	7.1082	0.983339	0	0	1	2	2	37	1	0	0	0	1
0	56	1	2006	0	21	1	0	0	0	0	4	4	4	7.8408	0.938097	0	0	0	1	2	31	1	0	0	0	0
0	33	1	2006	0	26	0	0	1	0	1	4	4	3	7.55	0.981329	0	0	1	1	2	39	1	0	0	1	0
0	55	0	2006	0	16	1	0	0	0	0	4	4	4	7.8408	0.956987	0	0	1	2	2	40	1	0	0	0	0
0	62	1	2006	0	16	1	0	0	0	0	4	4	4	7.8408	0.956987	0	0	1	1	2	28	1	0	0	0	0
0	67	1	2006	0	16	0	0	0	0	0	4	4	4	7.8408	0.956987	0	0	0	1	2	52	1	0	0	0	0
0	40	1	2006	0	75	1	0	0	0	0	0	0	0	0	0.00090466	0	0	1	1	2	30	1	1	0	1	0
1	24	0	2006	0	29	0	0	1	0	1	4	4	4	7.8408	0.982174	1	1	0	3	2	22	32	0	0	0	1
0	60	1	2006	0	16	1	0	0	0	0	4	4	4	7.8408	0.956987	2	0	0	2	2	68	1	0	0	0	0
0	42	1	2006	0	35	1	0	1	0	0	1	4	4	5.0304	0.703917	0	0	0	3	2	70	155	0	1	0	1
0	55	0	2006	0	25	0	0	0	0	0	3	2	3	5.148	0.460346	1	0	0	2	2	32	3	1	1	0	0
0	46	0	2006	0	17	1	0	0	0	0	4	4	4	7.8408	0.99283	0	0	0	1	2	61	13	0	0	0	0
0	19	1	2006	0	18	0	0	0	1	0	4	4	4	7.8408	0.992262	0	0	1	1	2	26	1	0	0	0	0
0	25	1	2006	0	19	1	0	0	0	1	4	2	4	6.3756	0.967032	0	0	1	3	2	42	9	0	0	0	1
0	20	1	2006	0	18	1	0	0	0	0	4	4	4	7.8408	0.992262	0	0	1	2	2	23	6	0	0	0	0
0	73	1	2006	0	16	0	0	1	0	0	4	4	4	7.8408	0.956987	1	0	0	2	2	55	1	0	0	1	0
1	34	0	2006	1	26	0	0	1	0	0	4	4	3	7.55	0.981329	1	0	0	3	2	40	1	0	0	0	0
0	20	1	2006	0	34	1	0	0	0	1	0	4	4	4.0936	0.512181	0	0	0	3	2	70	1	0	0	1	0
0	60	0	2006	0	66	1	0	1	0	1	0	2	3	2.3376	0.00249732	0	0	0	1	3	56	5	1	1	1	1
0	27	1	2006	0	26	1	0	0	0	0	2	4	4	5.9672	0.920657	0	0	1	2	3	30	1	0	0	0	0
0	69	1	2006	0	26	1	0	0	0	0	2	4	4	5.9672	0.63323	0	0	1	1	3	20	2	1	0	0	0
0	75	1	2006	0	17	1	0	0	0	0	4	4	4	7.8408	0.953712	0	0	0	1	3	102	1	0	0	0	0
0	62	1	2006	0	24	1	0	0	0	0	2	4	4	5.9672	0.668121	3	0	0	1	3	83	7	1	0	1	0
0	81	1	2006	0	16	1	0	0	0	0	4	4	4	7.8408	0.956987	0	0	0	1	3	48	1	0	0	0	0
0	17	0	2006	0	42	1	0	1	0	0	1	4	4	5.0304	0.581374	0	0	0	1	3	26	2	1	1	1	0
0	79	1	2006	0	25	1	0	0	0	0	4	4	4	7.8408	0.917668	0	0	0	3	3	32	1	0	0	0	0
0	63	1	2006	0	25	1	0	0	0	0	0	4	4	4.0936	0.23771	0	1	0	3	3	28	2	1	1	0	0
0	22	1	2006	0	27	1	0	1	0	1	4	4	3	7.55	0.979869	0	0	0	2	3	82	8	0	1	1	0
0	57	1	2006	0	18	0	0	1	0	0	4	4	4	7.8408	0.950201	0	0	0	1	3	19	4	0	0	0	0
1	41	1	2006	0	75	0	0	1	0	0	4	4	3	7.55	0.549517	1	1	0	1	3	64	2	1	1	1	0
0	62	1	2006	0	17	0	0	1	0	0	4	2	3	6.0848	0.794055	0	0	0	1	3	21	2	1	1	0	1
0	51	0	2006	0	25	1	0	1	0	0	4	4	3	7.55	0.982686	0	0	0	1	3	37	30	0	0	1	0
0	81	0	2006	0	26	1	0	0	0	1	4	4	3	7.55	0.886626	0	0	0	2	3	22	9	0	0	0	0
0	46	0	2006	0	43	1	0	1	0	1	4	2	3	6.0848	0.778672	0	0	0	2	3	26	171	0	1	0	0
0	38	1	2006	0	41	0	0	1	0	0	4	4	4	7.8408	0.956373	0	0	1	2	3	32	22	1	1	0	0
0	60	0	2006	0	26	0	0	0	0	1	4	2	4	6.3756	0.718266	0	0	0	1	3	25	1	0	0	0	1
1	20	0	2006	0	45	0	0	1	0	1	2	1	3	3.4786	0.200522	1	1	0	1	3	55	2	1	1	1	1
0	59	0	2006	0	50	1	0	1	0	1	4	2	3	6.0848	0.234177	0	0	0	1	3	39	20	0	1	0	1
0	47	1	2006	0	45	1	0	1	0	0	0	4	3	3.8028	0.254716	0	0	1	1	3	22	3	1	1	0	0
1	34	1	2006	0	22	0	1	0	0	1	4	4	3	7.55	0.986199	0	1	0	1	3	45	1	0	0	1	0
0	50	1	2006	0	36	0	0	1	0	1	4	3	3	6.8174	0.923772	0	0	0	1	3	22	18	0	0	0	1
0	46	1	2006	0	36	1	0	1	0	0	2	4	3	5.6764	0.803097	0	0	0	2	3	21	1	0	0	0	0
0	70	1	2006	0	17	1	0	0	0	0	4	4	4	7.8408	0.953712	0	0	0	1	3	26	1	0	0	0	0
0	47	1	2006	0	16	1	0	0	0	0	4	4	4	7.8408	0.993357	0	0	1	3	3	22	1	0	0	0	0
0	83	1	2006	0	17	1	0	0	0	0	3	4	4	6.904	0.893917	0	0	0	1	3	16	11	1	0	0	0
0	45	1	2006	0	24	0	0	1	0	0	4	4	3	7.55	0.983945	0	0	0	3	3	81	8	0	0	0	0
0	60	0	2006	0	22	0	0	1	1	0	4	4	4	7.8408	0.933484	0	0	0	3	3	47	7	0	0	0	0
0	73	1	2006	0	25	1	0	0	0	0	4	4	4	7.8408	0.917668	0	0	0	3	3	48	1	0	0	0	0
0	82	0	2006	0	27	1	0	0	0	0	0	4	4	4.0936	0.211005	0	0	0	2	3	82	100	0	1	1	0
0	64	1	2006	0	35	1	0	1	0	0	1	4	4	5.0304	0.261306	0	0	0	1	3	20	1	0	1	0	0
0	68	1	2006	0	19	1	0	0	1	0	3	1	3	4.4154	0.40195	0	0	1	1	3	46	2	1	1	1	1
0	20	1	2006	0	29	0	1	1	0	0	4	4	4	7.8408	0.982174	0	0	1	3	3	69	13	0	0	1	0
0	49	1	2006	0	27	0	0	1	0	0	1	4	3	4.7396	0.769037	0	0	1	3	3	47	2	1	1	0	0
0	70	1	2006	0	42	1	0	1	0	0	4	4	4	7.8408	0.751283	0	0	0	1	3	89	1	0	0	1	0
0	32	1	2006	0	26	1	0	0	0	0	4	4	4	7.8408	0.98579	0	0	0	2	3	65	1	0	0	0	0
0	60	1	2006	0	26	1	0	0	0	0	1	4	4	5.0304	0.41387	3	1	0	2	3	22	6	1	1	0	1
0	31	1	2006	0	26	1	0	0	0	0	2	4	4	5.9672	0.920657	0	0	0	3	3	20	1	0	0	1	0
0	63	1	2006	0	25	1	0	0	0	0	4	4	4	7.8408	0.917668	0	0	1	1	3	27	1	0	0	0	0
0	57	1	2006	0	41	1	0	1	1	0	2	3	4	5.2346	0.213307	0	0	0	2	3	30	39	1	0	0	1
0	65	1	2006	0	16	1	0	0	0	0	4	4	4	7.8408	0.956987	3	0	0	2	3	36	1	0	0	0	0
0	85	0	2006	0	16	1	0	0	0	0	3	4	4	6.904	0.900983	0	0	0	1	3	43	1	0	0	0	0
0	23	0	2006	0	22	0	0	1	0	1	4	4	3	7.55	0.986199	0	0	0	3	3	36	36	0	0	0	1
0	57	1	2006	0	17	1	0	0	0	0	4	4	4	7.8408	0.953712	0	0	0	1	3	93	1	0	0	1	1
0	77	1	2006	0	38	0	0	1	1	0	4	3	3	6.8174	0.607289	0	1	0	3	4	62	2	1	1	1	0
0	30	1	2006	0	25	0	0	0	0	0	4	4	4	7.8408	0.986827	0	0	0	1	4	30	17	0	1	0	0
0	72	0	2006	0	21	1	0	0	0	0	4	4	4	7.8408	0.938097	0	0	0	2	4	25	9	0	0	0	0
0	54	1	2006	0	29	1	0	1	0	0	1	4	4	5.0304	0.790315	2	0	0	2	4	54	7	1	1	0	0
0	16	1	2006	0	21	0	0	1	0	0	4	4	4	7.8408	0.990277	0	0	0	2	4	34	15	0	0	0	0
0	56	1	2006	0	24	0	0	1	0	0	4	4	4	7.8408	0.923288	0	0	0	1	4	32	1	0	0	0	0
0	70	1	2006	0	18	0	0	0	1	0	4	3	4	7.1082	0.904606	0	0	0	2	4	79	1	0	0	1	1
0	55	0	2006	0	34	0	0	1	1	1	4	4	3	7.55	0.808815	0	0	1	1	4	79	17	0	0	1	1
1	74	0	2006	1	17	0	0	1	0	0	4	4	4	7.8408	0.953712	0	0	0	2	4	38	1	0	0	1	1
0	76	1	2006	0	21	1	0	0	0	0	2	4	4	5.9672	0.717096	0	0	0	3	4	34	2	1	1	1	0
0	64	1	2006	0	22	1	0	1	0	0	4	4	3	7.55	0.914036	0	0	0	2	4	84	54	0	0	1	0
0	75	1	2006	0	17	1	0	0	0	0	4	4	4	7.8408	0.953712	0	0	0	1	4	57	1	0	0	0	0
0	30	1	2006	0	19	1	1	0	0	0	4	4	4	7.8408	0.99165	0	0	1	3	4	34	7	0	0	0	0
0	58	1	2007	0	29	1	0	0	0	0	0	4	4	4.0936	0.186566	0	0	0	2	4	38	3	1	1	0	0
0	53	0	2007	0	18	0	0	1	0	0	4	4	4	7.8408	0.992262	0	0	1	1	4	111	7	0	0	1	0
0	46	1	2007	0	25	1	0	0	0	0	4	4	4	7.8408	0.986827	0	0	1	2	4	82	1	0	0	0	0
0	33	1	2007	0	41	1	1	1	0	0	4	4	4	7.8408	0.956373	0	0	0	2	4	30	32	0	0	0	1
0	55	1	2007	0	22	1	0	1	0	0	3	4	4	6.904	0.851623	0	0	0	1	4	29	1	0	0	1	0
0	82	1	2007	0	17	1	0	0	0	0	4	4	4	7.8408	0.953712	0	0	0	1	4	21	1	0	0	0	0
0	86	0	2007	0	25	1	0	0	0	1	4	4	4	7.8408	0.917668	0	0	0	2	4	19	25	0	1	0	0
0	75	1	2007	0	30	1	0	0	0	0	0	2	3	2.3376	0.0382277	0	0	0	1	4	67	2	1	1	1	0
0	47	1	2007	0	17	1	0	0	0	0	4	4	4	7.8408	0.99283	0	0	1	1	4	43	1	0	0	0	0
1	49	0	2007	0	27	1	0	0	0	0	4	4	3	7.55	0.979869	0	0	0	1	4	59	1	0	0	1	1
0	65	1	2007	0	17	0	0	1	0	0	4	4	4	7.8408	0.953712	0	0	0	1	1	17	1	0	0	0	0
0	87	0	2007	0	20	0	0	1	0	0	4	4	4	7.8408	0.942409	0	0	0	1	1	40	36	0	1	0	0
0	55	1	2007	0	38	1	1	0	0	0	4	4	4	7.8408	0.804187	0	0	0	2	1	25	29	0	1	1	0
0	53	1	2007	0	29	0	0	1	0	1	4	3	4	7.1082	0.964766	0	0	1	2	1	37	1	0	0	0	0
0	25	0	2007	0	29	0	0	1	1	0	4	4	4	7.8408	0.982174	0	0	0	2	1	44	1	0	0	1	1
0	67	0	2007	0	25	1	0	0	0	0	2	3	4	5.2346	0.480935	2	1	0	2	1	41	9	0	1	0	0
0	72	1	2007	0	26	1	0	0	0	0	4	4	4	7.8408	0.911676	1	0	0	1	1	59	1	0	0	0	0
1	25	0	2007	0	34	1	0	1	0	1	3	4	4	6.904	0.938831	0	1	0	2	1	25	1	0	1	0	1
0	57	1	2007	0	18	0	0	1	0	0	4	4	3	7.55	0.935302	0	0	0	1	1	71	18	0	0	1	0
0	19	0	2007	0	38	1	0	1	0	0	2	4	4	5.9672	0.821963	0	0	0	3	1	80	17	0	0	0	0
0	39	1	2007	0	19	0	0	1	0	1	4	4	4	7.8408	0.99165	0	0	0	1	1	48	10	0	0	0	0
0	95	1	2007	0	16	1	0	0	0	0	4	4	4	7.8408	0.956987	0	0	0	3	1	26	1	0	0	0	0
0	75	0	2007	0	26	1	0	0	0	0	1	4	4	5.0304	0.41387	0	0	0	2	1	23	1	0	1	0	0
0	72	1	2007	0	45	1	0	1	0	0	1	4	4	5.0304	0.140977	1	0	0	2	1	26	5	0	1	0	0
0	38	1	2007	0	29	0	0	1	1	0	4	4	4	7.8408	0.982174	0	0	1	3	1	59	1	0	0	0	1
0	79	1	2007	0	16	1	0	0	0	0	4	4	4	7.8408	0.956987	1	0	0	1	1	36	1	0	0	0	0
0	83	0	2007	0	16	1	0	0	0	0	4	4	4	7.8408	0.956987	2	0	0	1	1	24	4	0	0	0	0
0	37	0	2007	0	17	0	0	0	1	0	4	4	4	7.8408	0.99283	0	1	0	3	1	23	1	0	0	0	0
0	46	1	2007	0	17	0	0	0	1	0	4	4	3	7.55	0.990558	0	0	0	3	1	54	38	1	0	0	0
0	50	1	2007	0	75	0	0	0	0	0	4	1	4	5.643	0.165021	2	0	0	1	1	68	3	1	1	1	0
0	33	1	2007	0	26	0	0	0	1	0	3	2	3	5.148	0.841504	0	0	1	1	1	23	2	1	1	0	1
0	23	1	2007	0	26	1	0	0	1	0	2	4	3	5.6764	0.897869	0	0	0	3	1	38	10	0	0	1	0
0	19	1	2007	0	42	1	0	1	0	0	1	4	3	4.7396	0.512716	0	0	0	3	1	56	42	0	0	0	0
0	57	1	2007	0	45	1	0	1	0	0	4	4	4	7.8408	0.705799	0	0	0	1	1	29	1	0	1	0	0
0	68	0	2007	0	45	1	0	1	0	0	1	4	4	5.0304	0.140977	0	0	1	2	1	79	38	0	0	1	0
0	68	0	2007	0	26	1	0	0	0	0	4	4	4	7.8408	0.911676	0	0	1	1	1	22	1	0	0	0	0
0	72	1	2007	0	26	1	0	1	0	0	4	4	4	7.8408	0.911676	0	0	1	2	1	57	46	0	0	1	0
0	66	1	2007	0	25	1	0	0	0	0	4	4	4	7.8408	0.917668	0	0	0	2	1	58	1	0	0	1	0
0	60	1	2007	0	21	0	0	0	0	1	4	4	4	7.8408	0.938097	1	0	0	1	1	58	8	1	0	1	1
0	62	1	2007	0	38	1	0	1	0	0	3	3	3	5.8806	0.387423	0	0	0	2	1	24	149	0	1	1	0
0	58	0	2007	0	25	1	0	0	0	1	3	1	4	4.7062	0.358793	0	0	0	1	1	34	19	0	0	1	1
0	75	1	2007	0	21	1	0	0	0	0	4	4	4	7.8408	0.938097	1	0	0	1	1	29	1	0	0	0	0
0	41	1	2007	0	41	1	0	1	1	0	2	4	3	5.6764	0.735316	0	0	0	2	1	72	17	1	1	1	0
0	44	1	2007	0	16	0	0	1	0	0	4	4	3	7.55	0.99125	0	0	0	1	1	60	1	0	0	0	0
0	55	1	2007	0	16	1	0	0	0	0	4	4	4	7.8408	0.956987	0	0	1	2	1	49	1	0	0	0	0
0	74	1	2007	1	16	0	0	0	0	1	4	1	3	5.3522	0.674178	0	0	0	1	1	42	8	0	1	1	1
0	25	0	2007	0	19	0	1	1	0	0	3	4	3	6.6132	0.973544	0	1	0	1	1	65	18	0	0	1	1
0	60	0	2007	0	21	1	0	0	0	0	4	4	4	7.8408	0.938097	0	0	0	1	2	45	1	0	0	1	0
1	31	1	2007	0	19	0	0	0	1	1	4	4	4	7.8408	0.99165	0	0	1	1	2	27	4	0	0	0	0
0	67	1	2007	0	17	1	0	0	0	0	4	3	4	7.1082	0.91103	0	0	0	1	2	60	5	0	0	0	0
0	81	1	2007	0	25	1	0	0	0	0	0	4	3	3.8028	0.191109	3	0	0	3	2	35	1	0	0	0	0
0	78	1	2007	0	26	1	0	0	0	0	2	4	4	5.9672	0.63323	3	0	0	2	2	46	1	0	1	0	0
0	43	0	2007	0	29	0	0	1	0	1	4	4	3	7.55	0.976605	0	0	0	1	2	162	23	0	0	1	1
0	76	0	2007	0	18	1	0	0	0	0	3	4	4	6.904	0.886411	0	0	0	2	2	63	1	0	0	1	0
0	50	0	2007	0	26	1	0	0	0	0	2	4	2	5.3856	0.869464	0	0	0	1	2	28	50	0	1	0	0
0	85	1	2007	0	20	1	0	0	0	0	4	4	4	7.8408	0.942409	2	0	1	2	2	53	1	0	0	0	0
0	83	1	2007	0	16	1	0	0	0	0	4	4	4	7.8408	0.956987	0	0	0	1	2	25	1	0	0	0	0
0	44	0	2007	0	22	1	0	0	0	1	4	4	4	7.8408	0.989509	0	0	1	2	2	25	1	0	0	0	0
0	64	1	2007	0	16	1	0	0	0	0	4	4	4	7.8408	0.956987	0	0	0	1	2	19	1	0	0	0	0
0	32	1	2007	0	35	1	0	1	0	0	3	4	3	6.6132	0.91503	0	0	0	3	2	63	45	0	0	0	0
0	81	1	2007	0	43	1	0	1	0	1	0	4	4	4.0936	0.0725821	0	0	0	1	2	52	56	0	1	1	0
0	87	0	2007	0	75	1	0	1	0	0	3	2	3	5.148	0.0180043	0	0	0	1	2	37	2	1	1	0	1
0	22	0	2007	0	18	0	0	1	0	0	4	4	4	7.8408	0.992262	0	0	0	1	2	48	3	0	0	0	0
0	58	0	2007	0	18	1	0	0	0	0	4	4	4	7.8408	0.950201	0	0	0	2	2	52	6	1	0	1	0
1	29	0	2007	0	75	0	0	0	0	0	1	4	3	4.7396	0.07702	0	0	1	1	2	23	2	1	1	0	0
0	54	1	2007	0	24	0	0	1	0	0	4	4	4	7.8408	0.987788	0	0	0	1	2	37	1	0	0	0	0
0	16	0	2007	0	25	1	0	0	0	0	4	3	3	6.8174	0.965761	0	0	0	1	2	42	1	0	0	0	0
0	86	0	2007	0	34	1	0	0	0	1	2	4	4	5.9672	0.48293	0	0	1	3	2	43	63	0	0	0	1
0	23	1	2007	0	29	0	0	1	0	1	4	1	3	5.3522	0.83671	0	0	0	1	2	82	31	0	1	1	1
0	25	1	2007	0	27	1	1	1	0	0	3	4	4	6.904	0.963336	1	0	0	1	2	21	39	0	0	0	0
0	54	0	2007	0	21	1	0	0	0	0	4	4	4	7.8408	0.990277	0	0	0	1	2	48	1	0	0	0	0
0	46	1	2007	0	19	0	0	0	1	1	4	4	4	7.8408	0.99165	2	0	1	1	2	114	9	0	0	1	0
0	49	1	2007	0	16	1	0	0	0	0	4	4	4	7.8408	0.993357	1	0	1	2	2	18	1	0	0	0	0
1	77	1	2007	0	34	0	0	1	0	0	4	4	4	7.8408	0.848112	0	0	0	1	2	111	2	1	1	1	0
0	78	1	2007	0	25	1	0	0	0	0	0	4	3	3.8028	0.191109	0	0	0	3	2	26	2	1	1	0	0
0	79	0	2007	0	16	1	0	0	0	0	2	4	4	5.9672	0.788199	1	0	0	2	2	23	1	0	0	0	0
0	44	1	2007	0	30	1	0	0	0	0	4	4	4	7.8408	0.980778	0	0	1	2	2	26	1	0	0	0	0
0	19	1	2007	0	27	1	0	0	0	0	2	4	4	5.9672	0.914863	0	0	0	3	2	52	1	0	1	1	0
0	56	1	2007	0	24	0	0	1	0	0	4	4	4	7.8408	0.923288	0	0	1	3	2	32	1	0	0	0	0
0	66	1	2007	0	18	1	0	0	0	0	4	4	4	7.8408	0.950201	0	0	0	1	2	76	1	0	0	1	0
0	17	1	2007	0	43	1	0	1	0	1	1	4	4	5.0304	0.562574	0	0	1	3	2	22	12	1	1	0	0
0	72	1	2007	0	35	1	0	1	0	0	1	4	2	4.4488	0.168783	0	0	0	1	2	20	3	1	1	0	0
0	19	1	2007	0	17	1	0	0	0	0	4	4	4	7.8408	0.99283	0	0	0	3	2	29	10	0	0	1	0
0	84	0	2007	0	21	1	0	0	0	0	4	4	4	7.8408	0.938097	3	0	0	2	2	30	5	1	0	0	0
0	78	1	2007	0	25	1	0	0	0	0	2	4	4	5.9672	0.650878	1	1	0	1	2	28	1	0	1	0	0
0	20	1	2007	0	50	1	0	1	1	1	1	1	3	2.5418	0.0653067	1	0	0	3	2	108	1	0	1	1	1
0	51	1	2007	0	45	1	0	1	0	0	4	4	4	7.8408	0.941601	0	0	0	2	2	36	30	0	0	1	0
0	57	0	2007	0	25	0	0	0	0	1	3	4	4	6.904	0.820094	2	0	1	1	2	15	24	1	0	0	0
1	30	1	2007	0	59	1	0	1	0	1	0	4	4	4.0936	0.133394	0	0	1	1	2	26	2	1	1	0	0
0	73	1	2007	0	18	0	0	1	0	0	4	4	4	7.8408	0.950201	0	0	0	1	2	29	14	0	0	0	0
1	34	1	2007	0	43	1	0	1	0	1	0	4	3	3.8028	0.284955	1	1	0	3	2	19	1	1	1	0	0
0	22	1	2007	0	17	0	0	1	0	0	4	4	4	7.8408	0.99283	0	0	1	1	3	62	1	0	0	0	0
0	56	1	2007	0	21	0	0	1	0	0	4	4	4	7.8408	0.938097	0	0	0	2	3	34	7	0	0	0	0
0	56	1	2007	0	16	1	0	0	0	0	4	4	4	7.8408	0.956987	0	0	1	3	3	28	1	0	0	0	0
0	73	0	2007	0	29	1	0	1	0	0	4	4	4	7.8408	0.891279	0	0	0	1	3	27	9	0	0	0	1
0	92	1	2007	0	25	1	0	0	0	0	1	4	4	5.0304	0.432615	6	0	0	1	3	28	3	1	0	0	0
0	69	1	2007	0	18	0	0	1	0	0	4	4	4	7.8408	0.950201	0	0	1	1	3	77	15	0	0	0	0
0	20	1	2007	0	17	0	0	1	0	0	4	4	4	7.8408	0.99283	0	0	0	3	3	104	1	0	0	1	0
0	80	1	2007	0	16	1	0	0	0	0	4	4	4	7.8408	0.956987	0	0	0	1	3	43	1	0	0	0	0
0	55	1	2007	0	17	1	0	0	0	0	4	4	4	7.8408	0.953712	0	0	0	1	3	63	13	0	0	0	0
0	72	0	2007	0	21	1	0	0	0	0	4	4	4	7.8408	0.938097	0	0	0	1	3	40	1	0	0	0	0
0	77	1	2007	0	34	1	0	1	1	1	2	3	4	5.2346	0.31702	0	0	0	3	3	75	13	0	0	1	1
0	51	1	2007	0	36	1	0	1	0	0	4	4	4	7.8408	0.969865	0	0	1	1	3	41	1	0	0	0	0
0	19	1	2007	0	17	0	0	0	1	0	4	4	4	7.8408	0.99283	0	0	0	1	3	46	1	0	0	0	0
0	22	1	2007	0	36	1	0	1	0	0	0	3	2	2.7794	0.204379	0	0	1	3	3	56	6	1	1	1	0
0	74	1	2007	0	18	1	0	0	0	0	4	4	4	7.8408	0.950201	0	0	1	2	3	58	1	0	0	1	0
0	53	1	2007	0	22	0	0	1	0	1	4	4	4	7.8408	0.989509	2	0	0	3	3	41	1	0	0	0	0
0	73	0	2007	0	22	0	0	1	1	0	4	4	4	7.8408	0.933484	0	0	0	1	3	73	1	0	0	0	0
0	80	1	2007	0	17	1	0	0	0	0	4	3	4	7.1082	0.91103	0	0	1	1	3	67	1	0	0	0	0
0	44	0	2007	0	18	0	0	1	0	0	4	4	4	7.8408	0.992262	0	0	0	1	3	27	1	0	0	0	0
1	60	0	2007	0	34	1	0	1	0	1	0	2	4	2.6284	0.037152	0	0	1	1	3	41	8	0	1	1	0
0	68	0	2007	0	17	1	0	0	0	0	4	4	3	7.55	0.939797	0	0	0	1	3	45	1	0	0	0	0
0	27	1	2007	0	25	0	0	0	1	1	4	3	3	6.8174	0.965761	0	0	1	3	3	104	26	0	1	1	1
0	86	1	2007	0	30	1	0	0	0	0	1	4	2	4.4488	0.229653	0	0	0	2	3	62	2	1	1	0	0
0	78	1	2007	0	33	1	0	1	0	0	4	4	4	7.8408	0.857743	0	0	1	1	3	36	19	0	0	0	0
0	32	1	2007	0	25	1	0	0	0	0	4	4	4	7.8408	0.986827	2	0	0	2	3	27	1	0	0	0	0
0	75	0	2007	0	43	1	0	1	0	1	4	4	3	7.55	0.679424	0	0	0	1	3	42	15	0	0	0	0
0	55	1	2007	0	26	0	0	1	1	0	4	4	4	7.8408	0.911676	2	0	0	3	3	55	2	0	0	0	0
0	70	1	2007	0	41	1	0	1	0	0	4	2	3	6.0848	0.379029	2	0	0	1	3	56	1	0	1	1	0
0	82	1	2007	0	57	1	0	1	0	1	0	2	4	2.6284	0.0065528	0	0	0	1	3	19	2	1	1	0	1
0	81	1	2007	0	25	0	0	1	0	0	4	4	3	7.55	0.89412	1	0	1	3	3	50	23	1	1	1	0
1	49	0	2007	0	50	0	0	1	0	0	0	4	3	3.8028	0.188832	0	0	0	2	3	21	46	0	1	1	0
0	82	1	2007	0	25	1	0	1	0	0	4	3	4	7.1082	0.84708	0	0	0	1	3	38	1	0	0	0	0
0	42	1	2007	0	16	1	0	0	0	0	4	4	4	7.8408	0.993357	0	0	0	2	4	48	1	0	0	0	0
0	58	0	2007	0	22	1	0	1	0	0	4	4	4	7.8408	0.933484	2	0	0	1	4	71	17	0	0	0	0
0	53	1	2007	0	26	1	0	0	0	0	3	4	4	6.904	0.965954	0	0	0	2	4	26	1	0	0	0	0
0	79	1	2007	0	18	0	0	0	1	0	4	3	4	7.1082	0.904606	0	0	0	2	4	36	1	0	0	0	0
0	85	1	2007	0	16	1	0	0	0	0	4	4	4	7.8408	0.956987	0	0	0	2	4	53	1	0	0	0	0
1	44	1	2007	0	21	1	0	0	0	0	3	4	4	6.904	0.976556	0	0	0	2	4	83	1	0	0	1	0
0	54	1	2007	0	17	1	0	0	0	0	3	4	4	6.904	0.982649	0	0	0	1	4	24	1	0	0	0	0
0	46	1	2007	0	50	1	0	1	0	1	1	4	3	4.7396	0.362731	0	0	0	1	4	70	1	0	1	1	0
0	66	1	2007	0	27	1	0	0	0	0	1	4	4	5.0304	0.395371	0	0	0	2	4	22	1	0	0	0	0
1	34	1	2007	0	50	0	0	1	0	0	4	4	4	7.8408	0.916543	3	0	1	1	4	19	51	0	1	0	0
0	77	0	2007	0	36	0	0	1	1	0	3	3	3	5.8806	0.424444	0	0	1	2	4	23	3	1	1	0	1
0	85	1	2008	0	16	1	0	0	0	0	2	4	4	5.9672	0.788199	0	0	0	3	4	71	1	0	0	0	0
0	77	1	2008	0	43	1	0	1	0	1	2	4	4	5.9672	0.318753	0	0	0	2	4	17	5	1	1	0	0
1	37	1	2008	0	24	0	0	1	0	0	4	4	4	7.8408	0.987788	1	0	1	3	4	43	25	0	0	0	0
0	70	1	2008	0	32	1	0	1	0	0	4	4	4	7.8408	0.86686	0	0	1	1	4	57	12	0	0	1	0
0	78	1	2008	0	45	1	1	0	0	0	0	4	3	3.8028	0.0483916	0	0	0	2	4	65	1	1	1	1	0
0	74	0	2008	0	18	1	0	0	0	0	3	4	4	6.904	0.886411	0	0	1	2	4	74	7	0	0	0	0
0	82	1	2008	0	25	1	0	0	0	0	0	4	4	4.0936	0.23771	0	0	0	2	4	37	13	1	1	0	0
0	75	1	2008	0	25	1	0	0	0	0	3	4	4	6.904	0.820094	0	0	0	2	4	42	1	0	0	0	0
0	77	1	2008	0	25	0	0	0	0	0	4	4	4	7.8408	0.917668	6	0	0	2	4	76	4	1	1	1	0
0	79	1	2008	0	16	1	0	0	0	0	4	4	4	7.8408	0.956987	0	0	0	2	4	22	1	0	0	0	0
0	70	1	2008	0	30	0	0	0	1	0	4	3	4	7.1082	0.790489	0	0	1	2	4	41	2	1	0	0	1
0	65	1	2008	0	20	1	0	0	0	0	4	4	4	7.8408	0.942409	0	0	0	2	4	76	1	0	0	0	0
0	67	1	2008	0	22	0	0	1	0	1	4	4	4	7.8408	0.933484	0	0	0	1	4	113	4	0	0	1	0
0	50	1	2008	0	16	1	0	0	0	0	4	4	4	7.8408	0.993357	0	0	0	2	4	79	1	0	0	0	0
0	60	1	2008	0	66	1	0	1	1	1	3	2	4	5.4388	0.0460787	5	1	0	2	4	63	1	1	1	1	0
0	86	0	2008	0	18	1	0	0	0	1	4	4	4	7.8408	0.950201	0	0	0	3	4	53	2	1	1	0	0
0	74	0	2008	0	34	1	0	0	0	1	4	4	4	7.8408	0.848112	0	0	0	2	4	23	10	0	0	0	0
0	70	0	2008	0	34	1	0	1	0	1	4	4	4	7.8408	0.848112	0	0	1	2	4	23	1	1	0	0	0
0	78	1	2008	0	34	1	0	0	0	1	0	4	4	4.0936	0.135114	0	0	1	2	4	37	121	0	1	1	0
0	81	1	2008	0	16	1	0	0	0	0	4	4	4	7.8408	0.956987	1	0	0	1	4	38	1	0	0	0	0
0	72	0	2008	0	18	0	0	1	0	0	4	4	4	7.8408	0.950201	0	0	1	1	1	58	5	0	0	0	0
0	74	1	2008	0	20	0	0	1	0	0	4	4	4	7.8408	0.942409	0	0	0	2	1	90	28	0	0	0	0
0	79	1	2008	0	38	1	0	1	0	0	0	2	3	2.3376	0.0210492	0	0	0	1	1	42	2	1	1	1	0
0	71	1	2008	0	26	0	0	1	1	0	4	4	4	7.8408	0.911676	0	0	0	1	1	42	4	0	0	0	0
1	58	1	2008	0	32	0	0	1	0	0	4	4	4	7.8408	0.86686	0	0	0	3	1	56	19	1	1	1	0
0	24	0	2008	0	18	0	0	0	1	0	4	4	4	7.8408	0.992262	0	0	1	3	1	54	1	0	0	0	0
0	16	1	2008	0	27	0	0	0	1	0	4	4	4	7.8408	0.984673	0	0	0	1	1	67	4	0	0	1	0
0	74	0	2008	0	33	1	0	1	0	0	4	4	4	7.8408	0.857743	0	0	0	1	1	33	15	0	0	0	0
0	24	1	2008	0	22	1	0	1	0	0	4	4	4	7.8408	0.989509	0	0	0	2	1	23	6	0	0	0	0
0	81	1	2008	0	17	1	0	0	0	0	4	4	4	7.8408	0.953712	0	0	0	1	1	25	1	0	0	0	0
0	69	0	2008	0	17	1	0	0	0	0	4	4	4	7.8408	0.953712	0	0	1	1	1	45	4	0	0	0	0
0	76	0	2008	0	38	0	0	1	0	1	4	4	3	7.55	0.756784	1	1	1	2	1	68	1	0	0	0	0
0	46	1	2008	0	45	1	0	1	0	0	4	4	4	7.8408	0.941601	0	0	1	2	1	65	9	0	0	1	0
0	62	0	2008	0	26	0	0	0	0	1	4	1	3	5.3522	0.489786	0	0	0	2	1	50	2	1	1	1	1
0	80	0	2008	0	50	1	0	1	0	1	3	2	4	5.4388	0.141678	1	0	0	2	1	37	15	0	1	1	1
1	64	0	2008	0	26	0	0	1	0	0	4	4	4	7.8408	0.911676	0	1	0	1	1	34	19	1	1	0	0
0	51	0	2008	0	27	0	0	0	0	1	4	4	4	7.8408	0.984673	0	0	0	2	1	24	4	0	0	0	1
0	86	1	2008	0	16	1	0	0	0	0	4	4	4	7.8408	0.956987	0	0	1	1	1	62	1	0	0	0	0
0	39	0	2008	0	29	1	0	1	0	0	2	4	4	5.9672	0.902112	0	0	1	3	1	35	9	0	1	0	0
0	74	0	2008	0	17	1	0	0	0	0	4	4	4	7.8408	0.953712	0	0	0	1	1	63	10	0	0	0	0
0	53	1	2008	0	29	1	0	1	0	0	3	4	3	6.6132	0.944667	0	0	0	3	1	46	13	0	0	0	0
0	72	1	2008	0	25	1	0	0	0	1	4	4	4	7.8408	0.917668	1	0	0	1	1	75	35	0	0	1	1
0	57	1	2008	0	50	1	0	1	0	1	0	4	3	3.8028	0.0334775	0	0	0	2	1	18	58	0	1	0	0
0	32	1	2008	0	21	1	0	0	0	0	2	4	4	5.9672	0.944555	0	0	1	2	1	67	4	0	1	0	0
0	64	0	2008	0	17	0	0	1	0	0	4	4	4	7.8408	0.953712	0	1	1	1	1	40	14	0	0	0	0
0	62	0	2008	0	17	1	0	0	0	0	4	4	4	7.8408	0.953712	2	0	0	3	1	56	11	0	0	0	0
0	54	1	2008	0	22	0	1	0	0	1	3	2	3	5.148	0.878325	0	0	1	3	1	59	2	1	1	0	0
0	76	1	2008	0	20	1	0	0	0	0	3	4	4	6.904	0.870004	0	0	0	1	1	81	1	0	0	1	0
0	41	1	2008	0	17	1	0	0	0	0	4	4	4	7.8408	0.99283	0	0	0	1	1	77	1	0	0	1	0
0	52	1	2008	0	29	1	0	1	0	0	2	4	4	5.9672	0.902112	0	0	0	1	1	65	19	0	1	1	0
0	44	1	2008	0	26	0	0	1	1	0	4	4	3	7.55	0.981329	0	0	1	1	1	89	25	0	0	1	1
0	88	1	2008	0	26	1	0	0	0	0	1	4	4	5.0304	0.41387	0	0	0	2	2	23	3	1	0	0	0
0	36	1	2008	0	41	0	0	1	1	1	4	2	4	6.3756	0.844104	0	0	1	3	2	36	69	0	1	1	1
0	65	1	2008	0	29	1	0	1	0	0	2	4	4	5.9672	0.578275	0	0	0	2	2	41	12	0	1	0	0
1	16	0	2008	0	32	0	0	1	1	0	4	4	3	7.55	0.97072	0	1	0	3	2	29	21	0	0	0	0
0	51	0	2008	0	20	1	0	0	0	0	4	4	4	7.8408	0.990989	0	0	0	2	2	25	15	0	0	0	0
0	91	0	2008	0	20	1	0	0	0	0	4	4	4	7.8408	0.942409	0	0	1	3	2	32	1	0	0	0	0
0	82	1	2008	0	17	1	0	0	0	0	3	4	4	6.904	0.893917	0	0	1	1	2	16	15	0	0	0	0
0	54	0	2008	0	36	0	0	1	1	0	4	4	4	7.8408	0.969865	0	0	0	1	2	76	31	0	0	1	1
0	50	0	2008	0	17	1	0	0	0	0	4	4	4	7.8408	0.99283	0	0	1	1	2	37	25	0	0	0	0
0	35	1	2008	0	29	1	0	1	0	0	4	4	3	7.55	0.976605	0	0	1	1	2	52	1	0	0	0	0
0	23	1	2008	0	27	1	0	0	0	0	2	4	3	5.6764	0.890608	0	0	1	3	2	25	53	0	1	0	0
0	18	1	2008	0	41	1	0	1	1	0	2	4	4	5.9672	0.785718	0	0	1	2	2	60	11	0	1	1	0
0	75	1	2008	0	18	0	0	0	1	0	3	2	2	4.8572	0.525257	0	0	1	1	2	89	12	0	1	1	1
0	70	1	2008	0	29	0	0	1	1	0	4	4	4	7.8408	0.891279	0	0	1	1	2	48	4	0	0	0	0
0	19	1	2008	0	41	1	0	1	0	0	3	4	4	6.904	0.899655	0	0	0	1	2	50	31	0	1	1	0
1	37	1	2008	0	25	0	0	0	1	1	4	4	4	7.8408	0.986827	0	1	0	2	2	27	13	0	0	0	0
0	68	0	2008	0	19	0	0	1	1	0	4	2	3	6.0848	0.767802	0	0	1	1	2	54	16	0	0	1	1
0	39	1	2008	0	25	0	0	1	0	1	4	2	4	6.3756	0.948724	0	0	1	1	2	46	10	0	0	0	1
0	32	0	2008	0	19	1	0	1	0	0	4	4	4	7.8408	0.99165	0	0	0	2	2	23	6	0	0	0	0
0	89	1	2008	0	21	0	0	1	0	0	4	4	4	7.8408	0.938097	0	0	0	2	2	51	3	1	0	0	0
0	60	0	2008	0	20	1	0	0	0	0	4	4	4	7.8408	0.942409	0	0	0	1	2	63	9	0	0	0	0
0	79	1	2008	0	25	1	0	0	0	0	3	4	4	6.904	0.820094	0	0	1	2	2	56	8	1	1	0	0
0	38	0	2008	0	42	0	0	1	1	0	4	3	3	6.8174	0.884315	0	0	1	2	2	15	6	0	0	0	1
0	74	0	2008	0	25	1	0	0	0	0	1	4	4	5.0304	0.432615	0	0	0	1	2	21	3	0	0	0	0
0	71	0	2008	0	26	1	0	0	0	1	4	4	4	7.8408	0.911676	0	0	0	1	2	65	10	0	0	1	0
0	50	1	2008	0	29	1	0	1	0	0	4	4	4	7.8408	0.982174	0	0	0	1	2	101	3	0	0	1	0
0	90	0	2008	0	16	1	0	0	0	0	4	4	4	7.8408	0.956987	0	0	1	1	2	20	1	0	0	0	0
0	64	0	2008	0	16	1	0	0	0	0	4	4	4	7.8408	0.956987	0	0	0	3	2	23	1	0	0	0	0
0	67	1	2008	0	17	1	0	0	0	0	4	4	4	7.8408	0.953712	0	0	0	1	2	30	1	0	0	0	0
1	22	1	2008	0	17	0	0	0	0	1	4	4	4	7.8408	0.99283	1	1	0	1	2	41	15	0	0	1	0
0	27	1	2008	0	26	1	0	1	0	0	0	0	0	0	0.0375495	0	0	1	2	2	79	1	1	0	1	0
0	42	1	2008	0	42	1	0	1	0	0	2	4	4	5.9672	0.772504	0	0	0	3	3	43	7	0	1	1	0
0	34	1	2008	1	16	0	0	0	0	1	4	4	4	7.8408	0.993357	0	0	0	1	3	25	7	0	0	0	1
0	54	1	2008	0	34	1	0	1	0	0	3	4	4	6.904	0.938831	0	0	0	1	3	73	1	0	0	1	0
0	19	1	2008	0	22	0	1	1	0	0	2	4	3	5.6764	0.922797	0	0	0	3	3	43	5	0	1	1	0
0	67	1	2008	0	17	1	0	0	0	0	4	4	4	7.8408	0.953712	0	0	1	3	3	63	12	0	0	0	0
0	65	0	2008	0	16	1	0	0	0	0	4	4	4	7.8408	0.956987	0	0	0	2	3	28	15	0	0	0	0
0	58	1	2008	0	17	1	0	0	0	0	4	4	4	7.8408	0.953712	1	0	0	3	3	27	1	0	0	0	0
0	99	1	2008	0	25	1	0	0	0	0	1	4	4	5.0304	0.432615	0	0	1	1	3	24	4	1	0	0	0
0	82	1	2008	0	25	0	0	1	0	1	4	4	4	7.8408	0.917668	1	0	1	2	3	61	3	1	1	0	0
0	29	0	2008	0	26	0	0	0	1	1	4	4	4	7.8408	0.98579	0	0	0	1	3	107	7	0	0	1	0
0	43	1	2008	0	16	1	0	0	0	0	4	4	4	7.8408	0.993357	0	0	0	1	3	30	1	0	0	0	0
0	81	0	2008	0	16	1	0	0	0	0	4	4	4	7.8408	0.956987	0	0	0	2	3	25	1	0	0	0	0
0	61	1	2008	0	29	1	0	1	0	0	3	4	4	6.904	0.770261	0	0	1	2	3	40	10	0	0	0	0
0	57	1	2008	0	16	1	0	0	0	0	4	4	4	7.8408	0.956987	0	0	0	2	3	31	1	0	0	0	0
0	71	1	2008	0	34	0	0	1	1	0	3	4	4	6.904	0.695463	0	0	0	1	3	113	2	1	1	1	0
0	44	1	2008	0	24	0	0	1	0	0	4	4	4	7.8408	0.987788	0	0	0	1	3	61	6	0	0	0	0
0	72	0	2008	0	22	1	0	1	0	0	4	4	4	7.8408	0.933484	0	0	0	1	3	30	14	0	0	0	0
0	79	1	2008	0	20	0	0	0	1	0	3	2	3	5.148	0.556027	0	0	0	1	3	96	2	1	1	1	1
0	74	1	2008	0	29	1	0	1	0	0	4	4	4	7.8408	0.891279	0	0	0	3	3	30	19	0	1	0	0
0	75	1	2008	0	30	1	0	0	0	0	2	4	4	5.9672	0.559442	0	0	1	2	3	43	39	0	0	1	0
0	78	0	2008	0	27	1	0	1	0	1	4	3	4	7.1082	0.826106	0	0	0	2	3	51	10	0	0	1	1
0	80	0	2008	0	34	1	0	1	0	1	4	3	4	7.1082	0.735104	0	0	0	1	3	21	10	0	0	0	1
0	37	1	2008	0	16	1	0	0	0	0	3	4	3	6.6132	0.978873	0	0	0	3	3	41	7	0	1	0	0
0	31	1	2008	0	19	0	0	1	0	1	4	4	3	7.55	0.989008	0	0	0	2	3	19	5	0	0	0	0
1	18	0	2008	0	26	1	0	1	0	0	4	4	4	7.8408	0.98579	0	0	1	3	3	35	8	0	0	0	0
0	69	1	2008	0	20	1	0	0	0	0	4	4	4	7.8408	0.942409	0	0	0	2	3	99	5	0	0	1	0
0	74	1	2008	0	26	1	0	0	0	0	3	4	4	6.904	0.808484	0	0	0	2	3	37	3	1	0	0	0
0	73	1	2008	0	45	0	0	1	0	1	4	4	4	7.8408	0.705799	3	0	0	1	3	83	2	1	1	1	1
0	64	1	2008	0	25	0	0	1	0	1	4	2	4	6.3756	0.733544	0	0	1	1	4	60	14	0	0	0	0
1	28	0	2008	0	20	0	0	0	1	0	4	4	4	7.8408	0.990989	1	1	0	3	4	65	19	0	0	1	0
0	54	1	2008	0	16	1	0	0	0	0	4	4	4	7.8408	0.993357	0	0	0	1	4	48	1	0	0	0	0
0	87	1	2008	0	26	0	0	1	0	0	0	4	4	4.0936	0.224075	0	0	0	3	4	18	22	1	1	0	0
0	41	0	2008	0	24	0	0	1	0	0	4	3	4	7.1082	0.975729	0	0	1	3	4	32	17	0	0	0	0
0	83	1	2008	0	18	1	0	0	0	0	3	4	4	6.904	0.886411	2	0	0	1	4	21	6	0	0	0	0
0	67	1	2008	0	33	0	0	1	1	0	3	4	3	6.6132	0.651364	0	0	0	1	4	82	28	0	1	1	0
0	81	1	2008	0	18	1	0	0	0	0	4	4	4	7.8408	0.950201	0	0	0	1	4	29	3	0	0	0	0
1	65	1	2008	0	25	0	0	1	0	1	4	4	4	7.8408	0.917668	0	0	1	1	4	51	3	0	0	1	0
0	50	1	2008	0	50	1	0	1	1	0	0	2	4	2.6284	0.0705368	0	0	0	3	4	48	2	1	1	1	0
0	59	1	2008	0	24	0	0	1	0	0	4	4	4	7.8408	0.923288	0	0	0	1	4	37	20	0	0	0	0
0	19	0	2009	0	24	0	0	1	0	0	4	4	4	7.8408	0.987788	0	0	0	1	4	39	27	0	0	0	0
0	48	1	2009	0	25	0	0	1	0	1	4	4	4	7.8408	0.986827	0	0	1	1	4	35	18	0	0	0	1
0	54	1	2009	0	21	0	0	1	0	0	4	4	4	7.8408	0.990277	0	0	0	1	4	31	4	0	0	1	0
0	54	1	2009	0	18	0	0	0	1	1	4	4	4	7.8408	0.992262	0	0	1	1	4	127	10	0	0	1	0
0	81	1	2009	0	50	1	0	1	0	1	4	4	3	7.55	0.553178	0	0	1	2	4	61	2	1	1	0	1
0	38	0	2009	0	29	0	0	0	1	0	4	4	4	7.8408	0.982174	0	0	0	1	4	46	6	0	0	0	1
0	55	1	2009	0	19	0	0	1	0	1	4	4	4	7.8408	0.946439	0	0	0	1	4	53	14	0	0	0	0
0	59	1	2009	0	25	0	0	1	0	1	4	4	4	7.8408	0.917668	0	0	0	1	4	23	1	0	0	0	0
0	92	1	2009	0	50	1	0	1	0	1	4	4	3	7.55	0.553178	0	0	0	2	4	22	115	0	1	0	0
0	48	0	2009	0	20	0	0	0	1	0	4	4	3	7.55	0.988141	0	0	1	2	4	30	1	0	0	0	0
0	50	1	2009	0	29	1	0	0	0	0	4	4	4	7.8408	0.982174	0	0	0	2	4	35	28	0	0	0	0
0	51	1	2009	0	25	0	0	0	0	0	3	4	4	6.904	0.968391	3	0	0	1	4	79	8	1	1	1	0
0	67	1	2009	0	25	1	0	0	0	0	2	4	4	5.9672	0.650878	0	0	0	3	4	22	12	0	0	0	0
0	34	1	2009	0	25	1	0	0	0	0	2	4	4	5.9672	0.926089	0	0	0	1	4	99	1	0	1	1	0
0	68	1	2009	0	26	1	0	0	0	0	4	4	4	7.8408	0.911676	0	0	1	2	4	40	8	0	0	0	0
0	46	1	2009	0	26	1	0	0	0	0	0	4	4	4.0936	0.659965	0	0	0	2	1	22	3	1	0	0	0
0	94	1	2009	0	25	1	0	0	0	0	4	4	4	7.8408	0.917668	0	0	1	1	1	19	8	0	0	0	0
0	67	0	2009	0	26	0	0	1	0	0	4	4	4	7.8408	0.911676	0	0	1	3	1	24	40	0	0	0	0
0	66	1	2009	0	22	1	0	1	0	0	4	4	3	7.55	0.914036	0	0	0	2	1	83	17	0	0	1	0
0	26	1	2009	0	34	1	0	1	1	1	4	4	3	7.55	0.966024	0	0	0	3	1	39	32	0	0	0	1
0	56	1	2009	0	20	0	0	1	0	0	4	4	4	7.8408	0.942409	0	0	1	1	1	73	22	0	0	1	0
0	53	1	2009	0	17	0	0	0	1	0	4	2	3	6.0848	0.962844	0	0	0	2	1	18	3	1	1	0	1
0	32	1	2009	0	50	1	0	1	0	1	2	4	3	5.6764	0.581895	0	0	0	3	1	64	38	0	1	1	1
1	61	0	2009	0	75	0	0	0	0	0	3	2	4	5.4388	0.0236275	0	0	0	1	1	47	2	1	1	1	0
0	49	1	2009	0	22	1	0	1	0	0	4	4	3	7.55	0.986199	0	0	0	1	1	46	15	0	0	0	0
1	50	0	2009	0	18	0	0	1	0	0	4	4	4	7.8408	0.992262	1	1	0	3	1	80	16	0	0	0	0
0	51	1	2009	0	22	0	1	1	0	0	4	4	4	7.8408	0.989509	0	0	0	2	1	35	16	0	0	0	0
0	85	1	2009	0	59	1	0	1	0	1	4	4	3	7.55	0.382799	0	0	0	2	1	43	2	1	1	1	1
0	42	1	2009	0	29	0	1	1	0	0	3	4	4	6.904	0.957507	0	0	1	1	1	89	15	0	1	1	0
0	87	0	2009	0	24	0	0	1	0	0	4	4	4	7.8408	0.923288	1	0	0	1	1	15	7	0	0	1	0
0	46	0	2009	0	25	1	0	0	0	0	4	4	4	7.8408	0.986827	2	1	0	2	1	24	19	0	0	0	0
0	80	1	2009	0	21	0	0	1	0	0	4	4	4	7.8408	0.938097	0	0	1	2	1	49	9	0	0	0	0
0	48	1	2009	0	41	1	0	1	0	1	4	2	3	6.0848	0.804009	0	0	1	1	1	93	56	0	0	1	1
0	38	1	2009	0	19	0	1	0	0	1	4	2	3	6.0848	0.95694	0	0	0	1	1	57	7	0	1	1	1
1	32	0	2009	0	27	1	1	0	0	1	0	2	2	2.0468	0.203082	1	1	0	1	1	43	21	0	1	1	0
0	52	1	2009	0	25	1	0	0	0	0	3	4	2	6.3224	0.946197	0	0	0	1	1	91	15	1	1	1	0
0	57	1	2009	0	29	1	0	1	0	0	4	4	4	7.8408	0.891279	0	0	1	1	1	33	6	0	0	0	0
0	20	1	2009	0	21	0	0	0	1	0	4	4	4	7.8408	0.990277	0	0	0	1	1	93	5	0	0	1	0
0	20	1	2009	0	34	1	1	0	0	1	4	4	4	7.8408	0.974045	0	0	0	2	1	59	10	0	1	0	0
0	57	1	2009	0	35	0	0	1	1	0	4	4	4	7.8408	0.837952	5	0	0	1	1	55	109	0	0	0	0
0	62	1	2009	0	24	0	0	1	0	0	4	4	4	7.8408	0.923288	0	0	1	1	1	31	5	0	0	1	0
0	78	0	2009	0	35	1	0	1	0	0	1	4	3	4.7396	0.211362	0	0	1	2	1	56	2	1	1	1	0
0	78	1	2009	0	26	1	0	0	0	0	4	4	4	7.8408	0.911676	0	0	0	1	1	28	4	0	0	0	0
0	61	1	2009	0	26	0	0	1	1	0	4	4	3	7.55	0.886626	0	0	1	2	1	82	22	0	0	1	0
0	73	0	2009	0	18	0	0	0	1	0	4	2	4	6.3756	0.824955	0	1	0	1	1	52	11	0	1	1	1
0	75	1	2009	0	21	0	0	1	0	0	4	4	4	7.8408	0.938097	0	1	0	1	1	48	6	0	0	0	0
0	74	0	2009	0	21	0	0	1	0	0	4	4	4	7.8408	0.938097	0	0	0	1	1	34	18	0	0	1	0
0	44	1	2009	0	26	1	0	1	0	0	2	4	4	5.9672	0.920657	0	0	1	3	1	35	16	0	1	0	0
0	21	1	2009	0	29	0	0	1	1	0	4	4	4	7.8408	0.982174	0	0	0	1	2	32	16	0	0	0	1
1	37	0	2009	0	29	0	0	1	0	0	0	1	3	1.605	0.125384	0	1	0	2	2	30	2	1	1	0	0
1	33	1	2009	0	50	0	1	1	0	1	3	1	4	4.7062	0.355395	1	0	0	3	2	52	4	1	1	1	1
0	48	1	2009	0	18	0	0	1	0	0	4	4	4	7.8408	0.992262	0	0	1	1	2	84	5	0	0	1	0
0	37	0	2009	0	26	1	0	1	0	0	4	4	4	7.8408	0.98579	0	0	0	1	2	64	13	0	0	0	0
0	57	1	2009	0	25	1	0	0	0	0	0	4	4	4.0936	0.23771	0	0	0	1	2	123	2	1	1	1	0
0	51	1	2009	0	24	0	0	1	0	0	4	4	4	7.8408	0.987788	0	0	1	1	2	122	9	0	0	1	0
0	80	0	2009	0	36	1	0	1	0	0	4	4	4	7.8408	0.827251	0	0	0	1	2	22	38	0	0	0	0
0	26	1	2009	0	27	1	0	1	0	1	4	4	4	7.8408	0.984673	0	0	0	3	2	74	5	0	0	0	0
1	33	0	2009	0	75	1	0	0	0	1	0	0	0	0	0.00090466	0	0	0	3	2	65	1	1	0	1	0
0	58	1	2009	0	21	0	0	1	0	0	4	4	4	7.8408	0.938097	0	0	0	1	2	61	14	0	0	0	0
0	37	1	2009	0	18	0	0	1	0	0	2	4	4	5.9672	0.955456	0	0	1	2	2	59	4	0	0	1	0
0	60	1	2009	0	41	1	0	1	0	0	4	3	4	7.1082	0.618472	1	0	1	1	2	57	57	0	0	1	0
1	16	0	2009	0	18	0	0	1	0	0	4	4	4	7.8408	0.992262	0	0	0	3	2	34	4	0	0	1	0
0	75	0	2009	0	50	1	0	1	0	1	2	4	4	5.9672	0.214651	0	0	0	2	2	24	7	1	1	1	0
0	49	0	2009	0	16	0	0	1	0	0	4	4	4	7.8408	0.993357	0	0	1	1	2	33	1	0	0	0	0
0	18	0	2009	0	50	0	0	1	1	1	3	4	3	6.6132	0.77288	0	0	1	1	2	25	2	1	1	1	1
0	46	0	2009	0	18	0	0	1	0	0	4	4	4	7.8408	0.992262	0	0	0	1	2	40	1	0	0	1	0
0	38	1	2009	0	20	0	0	1	0	0	4	4	4	7.8408	0.990989	0	0	1	2	2	27	8	0	0	0	0
0	24	1	2009	0	21	0	0	1	0	0	4	4	4	7.8408	0.990277	0	0	0	2	2	62	8	0	0	0	0
0	50	0	2009	0	24	0	0	1	0	0	4	4	4	7.8408	0.987788	0	0	1	1	2	59	32	0	0	1	0
0	29	1	2009	0	38	1	0	0	0	1	2	4	4	5.9672	0.821963	0	0	1	1	2	67	26	0	0	1	0
0	18	1	2009	0	45	1	0	1	0	0	1	4	3	4.7396	0.455238	0	0	0	3	2	42	39	0	1	1	0
0	36	1	2009	0	17	1	0	0	0	0	4	4	4	7.8408	0.99283	0	0	0	2	2	35	5	0	0	0	0
0	45	1	2009	0	21	0	0	1	0	0	4	4	4	7.8408	0.990277	0	0	0	2	2	28	13	0	0	0	0
0	59	1	2009	0	25	0	0	0	1	1	4	3	4	7.1082	0.84708	3	0	0	2	2	75	4	1	0	1	0
0	76	1	2009	0	24	0	0	1	0	0	4	4	4	7.8408	0.923288	0	0	1	1	2	27	9	0	0	0	0
0	59	0	2009	0	26	1	0	1	0	0	4	4	4	7.8408	0.911676	0	0	1	2	2	61	18	0	0	1	0
0	34	1	2009	0	50	0	0	1	0	1	4	4	4	7.8408	0.916543	0	1	1	2	2	77	8	1	1	1	0
0	85	0	2009	0	18	1	0	0	0	0	4	4	4	7.8408	0.950201	1	0	0	3	2	28	15	0	0	0	0
0	53	1	2009	0	21	0	0	1	0	0	4	4	4	7.8408	0.990277	0	0	0	1	2	33	14	0	0	0	0
0	55	1	2009	0	16	1	0	0	0	0	4	4	4	7.8408	0.956987	0	0	1	1	2	70	11	0	0	0	0
0	64	1	2009	0	25	1	0	0	0	0	2	4	4	5.9672	0.650878	3	0	1	1	2	38	4	0	1	0	0
0	53	1	2009	0	17	0	0	1	0	0	4	4	4	7.8408	0.99283	0	0	0	1	2	61	3	0	0	0	0
0	68	1	2009	0	25	0	0	0	0	0	4	4	4	7.8408	0.917668	0	0	0	3	2	32	3	1	1	0	0
0	24	0	2009	0	21	0	0	1	0	0	4	4	4	7.8408	0.990277	0	0	0	1	2	95	9	0	0	1	0
0	68	0	2009	0	25	1	0	0	0	0	4	4	4	7.8408	0.917668	1	0	1	2	2	33	4	0	0	0	0
0	60	1	2009	0	26	0	0	1	0	1	4	3	3	6.8174	0.795359	0	0	1	1	2	28	12	0	1	1	1
0	50	1	2009	0	16	1	0	0	0	0	4	4	4	7.8408	0.993357	0	0	1	3	2	43	11	0	0	0	0
0	77	0	2009	0	16	1	0	0	0	0	4	4	4	7.8408	0.956987	2	0	0	1	2	61	14	1	0	0	0
0	37	1	2009	0	34	1	0	1	0	1	4	4	3	7.55	0.966024	0	0	0	1	2	71	2	1	1	1	0
0	61	1	2009	0	29	0	0	1	0	0	4	3	3	6.8174	0.75531	1	0	0	2	2	84	275	0	1	1	1
0	72	0	2009	0	17	0	0	1	0	0	4	4	4	7.8408	0.953712	0	0	0	1	2	68	8	0	0	0	0
0	72	1	2009	0	18	1	0	0	0	0	4	4	4	7.8408	0.950201	0	0	1	3	3	48	21	0	0	0	0
0	66	1	2009	0	25	1	0	1	0	0	4	4	4	7.8408	0.917668	0	0	1	1	3	56	11	0	0	1	0
0	58	1	2009	0	32	0	0	1	1	0	4	4	3	7.55	0.831449	0	0	0	1	3	38	14	0	0	1	0
0	35	1	2009	0	17	0	0	1	0	0	4	4	3	7.55	0.990558	0	0	0	2	3	115	1	0	0	0	0
0	75	1	2009	0	16	0	0	1	0	0	0	0	0	0	0.0123578	0	0	0	1	3	80	3	1	1	0	0
0	69	1	2009	0	41	0	0	1	1	1	4	4	4	7.8408	0.765355	0	0	0	1	3	69	49	0	0	0	1
0	83	0	2009	0	26	1	0	1	0	0	4	4	4	7.8408	0.911676	0	0	0	2	3	42	7	0	0	0	0
0	71	1	2009	0	25	1	0	0	0	0	1	4	4	5.0304	0.432615	2	1	0	3	3	24	5	1	0	0	0
0	50	1	2009	0	26	0	0	1	0	0	4	4	4	7.8408	0.98579	0	0	0	1	3	104	10	0	1	1	0
0	93	1	2009	0	27	1	0	0	0	0	2	4	4	5.9672	0.615218	0	0	0	1	3	101	2	1	1	1	0
0	59	1	2009	0	17	0	0	0	0	1	4	4	4	7.8408	0.953712	0	0	0	1	3	71	6	0	0	1	1
0	57	1	2009	0	38	0	0	1	0	1	3	2	4	5.4388	0.293216	0	0	0	2	3	63	35	0	0	1	0
0	45	1	2009	0	17	0	0	1	0	0	4	4	4	7.8408	0.99283	0	0	0	1	3	48	6	0	0	0	0
0	18	1	2009	0	17	1	0	0	0	0	4	4	4	7.8408	0.99283	0	0	0	3	3	97	3	0	0	1	0
0	64	0	2009	0	38	1	0	1	0	0	3	3	4	6.1714	0.454968	0	0	0	1	3	25	4	1	1	1	0
0	75	1	2009	0	22	1	0	0	1	0	4	4	4	7.8408	0.933484	0	0	0	1	3	39	18	0	0	0	0
0	80	0	2009	0	24	1	0	0	0	0	4	4	4	7.8408	0.923288	0	0	0	2	3	45	9	0	0	0	0
0	70	1	2009	0	22	1	0	1	0	0	4	4	4	7.8408	0.933484	0	0	0	1	3	70	20	0	1	1	0
0	60	0	2009	0	26	0	0	1	0	0	4	4	4	7.8408	0.911676	0	1	1	3	3	35	58	0	1	0	0
0	78	1	2009	0	25	1	0	0	0	0	4	4	4	7.8408	0.917668	0	0	1	1	3	59	92	0	0	0	0
0	59	1	2009	0	25	0	0	1	0	0	4	4	4	7.8408	0.917668	0	0	0	3	3	47	18	0	1	0	0
0	67	1	2009	0	19	0	0	1	0	1	4	3	4	7.1082	0.897769	0	0	0	3	3	17	16	1	1	0	0
0	34	1	2009	0	33	1	0	1	0	0	2	4	3	5.6764	0.837013	0	0	1	3	3	24	25	0	0	0	0
0	33	1	2009	0	75	1	1	0	0	1	0	0	0	0	0.00090466	0	0	0	3	3	175	1	1	0	1	0
0	74	0	2009	0	16	0	0	1	0	0	4	4	4	7.8408	0.956987	0	0	0	1	3	59	4	0	0	0	0
0	59	1	2009	0	25	0	0	1	0	1	4	4	3	7.55	0.89412	0	0	0	3	3	42	33	0	1	1	1
0	55	0	2009	0	45	0	0	1	0	1	4	4	3	7.55	0.64509	0	0	0	2	3	33	42	0	1	1	1
0	69	0	2009	0	41	0	0	1	1	1	4	4	4	7.8408	0.765355	0	0	0	1	3	92	14	0	1	1	1
0	77	1	2009	0	25	1	0	0	0	0	0	4	4	4.0936	0.23771	0	0	0	1	3	71	2	1	1	1	0
1	45	1	2009	0	50	1	0	1	0	1	2	4	4	5.9672	0.647507	0	0	0	2	3	54	11	0	1	1	0
0	35	1	2009	0	75	0	0	0	0	0	4	4	4	7.8408	0.616865	0	0	0	3	3	92	2	1	1	1	0
0	61	1	2009	0	45	1	0	1	0	0	3	3	4	6.1714	0.327785	0	0	0	1	3	33	2	1	1	1	0
0	74	1	2009	0	21	0	0	1	0	0	4	2	3	6.0848	0.739301	0	0	1	1	3	127	27	0	1	1	0
0	62	0	2009	0	75	1	0	1	0	0	2	4	4	5.9672	0.0385263	0	1	1	1	3	94	14	0	1	1	1
0	52	1	2009	0	29	0	1	1	0	0	4	4	4	7.8408	0.982174	0	1	0	1	3	24	13	0	0	1	0
0	75	1	2009	0	25	1	0	0	0	0	1	4	2	4.4488	0.304434	0	0	0	2	3	47	5	0	0	0	0
0	70	1	2009	0	24	0	0	1	0	0	4	4	4	7.8408	0.923288	0	0	0	1	3	92	5	0	0	1	0
0	76	1	2009	0	45	1	0	1	0	0	0	4	2	3.512	0.0370987	0	0	0	2	4	64	38	0	1	1	0
0	80	0	2009	0	17	0	0	1	0	0	4	4	4	7.8408	0.953712	0	0	0	2	4	36	19	0	0	0	0
0	64	0	2009	0	33	1	0	0	0	0	3	4	4	6.904	0.71148	0	0	0	2	4	22	9	0	0	0	0
0	59	1	2009	0	36	0	0	1	1	0	4	3	4	7.1082	0.704136	0	0	0	1	4	80	20	0	1	1	1
0	80	1	2009	0	29	1	0	1	0	0	4	4	4	7.8408	0.891279	0	0	0	1	4	47	27	0	0	0	0
0	86	1	2009	0	35	1	0	0	0	1	3	4	4	6.904	0.678957	1	0	0	2	4	32	2	1	1	1	0
0	73	1	2009	0	24	0	0	1	0	0	4	4	4	7.8408	0.923288	0	0	1	1	4	91	27	0	0	1	0
0	90	1	2009	0	25	1	0	0	0	0	1	4	4	5.0304	0.432615	0	0	0	1	4	31	1	0	0	0	0
0	58	0	2009	0	29	1	0	0	1	0	4	4	4	7.8408	0.891279	0	0	0	2	4	37	15	0	0	1	0
0	30	1	2009	0	38	1	0	0	0	1	4	4	4	7.8408	0.965037	0	0	0	1	4	98	9	0	0	1	0
0	23	0	2009	0	45	1	0	1	0	0	2	2	2	3.9204	0.276603	0	0	0	1	4	40	14	0	1	1	0
0	79	1	2009	0	17	1	0	0	0	0	4	4	4	7.8408	0.953712	0	0	1	2	4	30	12	0	0	0	0
0	59	1	2009	0	33	1	0	1	0	0	2	4	4	5.9672	0.502124	0	0	1	1	4	25	7	0	0	0	0
0	74	0	2009	0	25	1	0	1	0	0	3	4	4	6.904	0.820094	0	0	1	2	4	26	14	0	0	1	0
0	54	1	2009	0	18	0	0	1	1	0	4	3	4	7.1082	0.984552	0	0	0	1	4	21	1	0	0	0	0
0	47	1	2009	0	19	1	0	0	1	0	4	4	4	7.8408	0.99165	0	0	0	3	4	57	3	0	0	1	0
0	51	1	2009	0	17	0	0	1	0	0	4	4	4	7.8408	0.99283	0	0	0	1	4	28	3	0	0	0	0
1	16	1	2009	0	30	1	0	0	0	0	3	4	4	6.904	0.95427	0	0	0	3	4	38	17	1	1	0	0
0	38	0	2010	0	50	0	0	1	0	0	4	2	3	6.0848	0.672681	0	0	0	3	4	36	32	1	1	0	0
0	89	0	2010	0	16	1	0	0	0	0	4	4	4	7.8408	0.956987	2	0	0	1	4	30	3	0	0	0	0
0	77	1	2010	0	26	1	0	1	0	0	1	4	4	5.0304	0.41387	0	0	0	1	4	57	20	0	0	1	0
1	48	0	2010	0	34	0	0	1	0	0	3	3	3	5.8806	0.852489	0	0	0	1	4	83	2	1	1	1	0
0	81	1	2010	0	25	1	0	0	0	0	1	4	4	5.0304	0.432615	0	1	1	2	4	26	7	0	0	0	0
0	52	0	2010	0	17	1	0	0	0	0	4	4	4	7.8408	0.99283	0	0	0	2	4	25	7	0	0	1	0
0	82	0	2010	0	57	1	0	1	1	1	1	1	3	2.5418	0.00603611	0	0	0	2	4	38	2	1	1	1	0
0	83	0	2010	0	26	1	0	0	0	0	3	4	4	6.904	0.808484	1	0	0	2	4	36	15	1	0	1	0
0	68	1	2010	0	20	0	0	1	0	0	4	4	4	7.8408	0.942409	0	0	1	1	4	38	3	0	0	0	0
0	82	1	2010	0	16	1	0	0	0	0	3	4	4	6.904	0.900983	0	0	1	1	4	29	1	0	0	0	0
0	77	0	2010	0	27	0	0	1	1	1	4	4	3	7.55	0.878674	0	0	1	1	4	101	14	0	0	1	0
0	78	0	2010	0	19	1	0	0	0	1	3	4	4	6.904	0.878445	0	0	0	1	4	64	1	0	1	1	0
0	28	0	2010	0	18	0	0	1	0	0	4	4	4	7.8408	0.992262	0	0	0	2	4	61	1	0	0	0	0
0	61	0	2010	0	26	1	0	0	0	0	4	4	4	7.8408	0.911676	0	0	0	3	4	31	14	0	0	0	0
0	63	1	2010	0	16	1	0	0	0	0	4	4	4	7.8408	0.956987	1	0	0	1	4	103	8	1	0	1	0
1	26	1	2010	0	41	0	0	1	0	0	0	4	4	4.0936	0.380159	1	1	0	2	4	72	55	0	1	1	0
0	54	1	2010	0	16	0	0	0	0	0	4	4	4	7.8408	0.993357	0	1	1	3	4	87	14	0	0	0	0
0	20	0	2010	0	18	0	0	1	0	1	4	3	4	7.1082	0.984552	0	0	0	3	4	104	6	0	0	1	0
0	85	0	2010	0	26	1	0	0	0	0	1	4	3	4.7396	0.348525	0	0	0	1	4	20	16	0	0	0	0
0	86	0	2010	0	30	1	0	0	0	0	1	4	4	5.0304	0.341821	0	0	0	3	4	50	3	1	1	1	0
0	77	1	2010	0	16	1	0	0	0	0	4	4	4	7.8408	0.956987	0	0	0	2	4	38	11	0	0	0	0
0	65	1	2010	0	42	0	0	1	0	1	4	4	4	7.8408	0.751283	0	0	0	1	4	81	101	0	1	1	1
0	69	0	2010	0	17	0	0	1	0	0	4	4	4	7.8408	0.953712	0	0	1	1	4	43	7	0	0	0	0
0	69	1	2010	0	16	0	0	1	0	0	4	4	4	7.8408	0.956987	0	0	0	1	1	34	34	0	0	0	0
1	27	1	2010	0	34	0	0	1	0	0	4	4	4	7.8408	0.974045	0	1	0	2	1	68	17	0	0	1	0
0	79	1	2010	0	50	1	0	1	0	1	3	4	4	6.904	0.400586	0	0	0	2	1	73	20	0	0	1	1
0	61	1	2010	0	41	1	0	1	0	1	4	4	4	7.8408	0.765355	0	0	0	2	1	27	7	0	0	0	0
0	99	0	2010	0	27	1	0	0	0	0	4	4	4	7.8408	0.905293	0	0	1	2	1	93	25	0	0	1	0
0	61	1	2010	0	57	1	0	1	1	0	1	1	4	2.8326	0.0079516	0	0	1	3	1	19	95	0	1	0	0
0	65	0	2010	0	16	1	0	0	0	0	4	4	4	7.8408	0.956987	0	0	0	1	1	30	1	0	0	0	0
0	71	1	2010	0	16	1	0	0	0	0	4	4	4	7.8408	0.956987	0	0	0	2	1	55	7	0	0	0	0
0	85	0	2010	0	17	1	0	0	0	0	0	4	4	4.0936	0.365662	0	0	0	1	1	85	14	1	1	1	0
0	65	1	2010	0	20	0	0	1	0	0	4	4	4	7.8408	0.942409	3	0	0	1	1	35	11	0	0	0	0
0	26	1	2010	0	18	0	0	1	0	0	4	4	4	7.8408	0.992262	0	0	0	1	1	89	3	0	0	1	0
0	53	1	2010	0	20	0	0	1	0	0	4	4	4	7.8408	0.990989	0	0	1	1	1	59	3	0	0	1	0
0	75	0	2010	0	25	1	0	1	0	0	4	4	4	7.8408	0.917668	0	0	1	2	1	54	58	0	0	0	0
0	83	1	2010	0	17	1	0	0	0	0	4	4	4	7.8408	0.953712	0	0	0	1	1	50	4	0	0	0	0
0	57	1	2010	0	38	0	0	1	1	0	4	4	4	7.8408	0.804187	0	0	0	2	1	24	1	0	1	0	1
0	76	1	2010	0	16	1	0	0	0	0	4	4	4	7.8408	0.956987	1	0	0	3	1	28	7	0	0	0	0
0	33	1	2010	0	16	0	0	1	0	0	3	4	3	6.6132	0.978873	0	0	0	1	1	28	3	0	0	1	0
0	61	0	2010	0	17	0	0	1	0	0	4	4	4	7.8408	0.953712	0	0	0	1	1	41	3	0	0	0	0
0	80	1	2010	0	16	1	0	0	0	0	4	4	4	7.8408	0.956987	0	0	1	1	1	78	4	0	0	0	0
0	80	0	2010	0	26	1	0	0	0	0	4	4	4	7.8408	0.911676	1	0	0	1	1	37	7	0	0	0	0
0	60	0	2010	0	22	1	0	1	0	0	4	4	4	7.8408	0.933484	2	0	0	1	1	39	14	0	0	0	0
0	81	1	2010	0	25	1	0	0	0	0	1	4	4	5.0304	0.432615	0	0	0	3	1	30	2	1	0	0	0
1	37	1	2010	1	16	0	0	0	1	0	4	4	4	7.8408	0.993357	0	1	1	1	1	38	11	0	0	0	1
0	86	1	2010	0	16	1	0	0	0	0	4	4	4	7.8408	0.956987	0	0	0	2	1	56	4	0	0	0	0
0	45	1	2010	0	43	1	0	1	0	1	1	1	2	2.251	0.0830918	0	0	1	2	1	30	2	1	1	1	0
0	37	1	2010	0	19	0	1	1	0	0	4	3	4	7.1082	0.983339	0	0	1	3	1	39	28	0	0	0	0
0	26	1	2010	0	16	1	0	0	0	0	4	4	4	7.8408	0.993357	0	0	0	2	1	53	10	0	0	1	0
0	72	1	2010	0	45	1	0	1	0	0	1	2	4	3.5652	0.0389557	0	0	0	1	1	95	2	1	1	1	0
0	58	1	2010	0	18	0	0	1	0	1	4	4	4	7.8408	0.950201	1	0	0	3	1	71	10	0	0	0	1
1	70	1	2010	0	50	0	0	1	0	0	0	2	3	2.3376	0.00848254	1	0	0	1	1	56	3	1	1	1	0
0	70	0	2010	0	50	1	0	1	0	1	2	4	4	5.9672	0.214651	0	0	0	1	1	24	9	1	1	1	0
0	85	0	2010	0	50	1	0	1	0	1	0	3	4	3.361	0.0222158	0	0	1	1	1	115	2	1	1	1	0
0	17	1	2010	0	17	0	0	1	0	0	4	4	4	7.8408	0.99283	0	0	0	2	1	30	6	0	0	0	0
0	83	0	2010	0	27	1	0	0	0	0	2	4	4	5.9672	0.615218	0	0	0	1	1	44	5	0	0	0	0
0	77	1	2010	0	26	1	0	0	0	0	4	4	4	7.8408	0.911676	0	0	0	1	1	29	3	1	0	0	0
0	77	1	2010	0	29	1	1	0	0	0	4	4	4	7.8408	0.891279	0	0	0	1	2	73	94	0	1	1	0
0	43	0	2010	0	24	0	0	0	0	1	4	4	4	7.8408	0.987788	0	0	1	2	2	67	44	0	0	1	1
0	33	1	2010	0	16	1	0	0	0	0	4	4	4	7.8408	0.993357	0	0	1	1	2	34	1	0	0	0	0
1	64	0	2010	0	29	0	0	0	0	1	4	4	4	7.8408	0.891279	1	1	0	3	2	55	8	0	0	0	0
0	25	0	2010	0	29	0	0	1	0	1	4	4	4	7.8408	0.982174	0	0	0	2	2	25	8	0	0	1	0
0	29	1	2010	0	20	0	0	1	0	0	4	4	4	7.8408	0.990989	0	0	1	1	2	82	5	0	0	1	0
0	78	0	2010	0	18	1	0	0	0	0	4	4	4	7.8408	0.950201	0	0	0	1	2	27	1	0	0	1	0
1	60	1	2010	0	75	1	1	1	0	1	0	0	0	0	0.000134709	0	0	0	3	2	29	1	1	0	1	0
0	20	0	2010	0	21	0	0	1	0	0	4	4	4	7.8408	0.990277	0	0	1	2	2	85	7	0	0	1	0
0	39	1	2010	0	50	1	0	1	1	0	4	4	4	7.8408	0.916543	0	0	0	1	2	73	15	0	0	1	0
0	48	1	2010	0	21	0	0	1	0	0	4	4	4	7.8408	0.990277	0	0	0	3	2	50	18	0	0	1	0
0	73	0	2010	0	16	1	0	0	0	0	4	4	4	7.8408	0.956987	0	0	0	1	2	38	1	0	0	0	0
0	32	1	2010	1	35	0	0	1	1	0	4	4	3	7.55	0.963411	0	0	0	3	2	35	18	0	0	1	1
0	41	1	2010	0	20	0	0	1	0	0	4	3	4	7.1082	0.982033	0	0	1	1	2	48	6	0	0	1	0
0	72	1	2010	0	25	1	0	0	0	0	2	4	4	5.9672	0.650878	0	0	1	1	2	35	5	0	0	0	0
0	87	1	2010	0	30	1	0	0	0	0	3	4	4	6.904	0.756389	0	0	0	1	2	46	44	0	0	1	0
1	64	1	2010	0	25	0	0	0	0	0	4	2	4	6.3756	0.733544	0	0	0	1	2	45	3	1	1	0	0
0	68	1	2010	0	18	1	0	0	0	0	4	3	4	7.1082	0.904606	1	1	0	3	2	57	4	0	0	0	0
0	41	1	2010	0	38	1	0	1	0	0	3	4	4	6.904	0.918624	0	0	0	3	2	73	4	0	0	1	0
0	24	1	2010	0	18	0	0	1	0	0	4	4	4	7.8408	0.992262	0	0	0	2	2	62	3	0	0	0	0
0	19	1	2010	0	35	0	0	0	1	1	3	4	4	6.904	0.934269	0	0	0	3	2	60	18	0	0	1	1
0	16	1	2010	0	17	0	0	1	0	0	4	4	4	7.8408	0.99283	0	0	1	1	2	91	9	0	0	0	0
0	28	1	2010	0	25	0	0	0	0	0	4	4	4	7.8408	0.986827	0	0	0	1	2	74	3	0	1	1	0
0	83	1	2010	0	54	1	0	1	0	0	3	4	4	6.904	0.329549	0	0	0	1	2	93	135	0	1	1	0
1	34	0	2010	0	25	0	0	1	0	1	4	2	4	6.3756	0.948724	1	0	1	3	2	27	132	0	1	0	1
0	19	1	2010	0	25	1	0	0	0	0	1	4	4	5.0304	0.83672	0	0	1	2	2	28	30	1	1	0	0
0	81	1	2010	0	16	0	0	0	0	0	4	4	4	7.8408	0.956987	0	0	0	2	2	19	8	0	0	0	0
0	35	0	2010	0	16	0	0	0	1	0	4	4	4	7.8408	0.993357	0	0	0	2	2	28	1	0	0	0	1
0	79	1	2010	0	18	1	0	1	0	0	4	4	4	7.8408	0.950201	0	0	0	1	2	35	9	0	0	0	0
0	53	1	2010	0	25	0	0	1	0	1	4	4	4	7.8408	0.986827	0	0	0	1	2	134	6	0	0	1	0
0	24	0	2010	0	16	0	0	0	0	0	4	4	4	7.8408	0.993357	0	0	1	3	2	28	6	0	1	0	0
0	61	0	2010	0	16	1	0	0	0	0	2	4	4	5.9672	0.788199	2	0	1	3	2	40	2	1	0	0	0
0	46	1	2010	0	17	1	0	0	0	0	4	4	4	7.8408	0.99283	0	0	0	2	2	75	3	0	0	1	0
0	42	0	2010	1	16	0	0	1	0	0	4	4	3	7.55	0.99125	0	0	0	3	2	36	8	0	1	1	0
1	46	1	2010	0	41	1	1	1	1	1	3	2	3	5.148	0.626552	0	0	0	2	2	23	2	1	1	0	0
0	79	1	2010	0	16	1	0	0	0	0	4	4	4	7.8408	0.956987	0	0	0	1	2	28	1	0	0	0	0
0	32	1	2010	0	75	1	1	1	0	1	0	3	3	3.0702	0.0166783	0	0	0	3	2	50	2	1	1	1	0
0	98	1	2010	0	25	1	0	0	0	0	2	3	4	5.2346	0.480935	0	0	0	3	2	50	4	0	0	0	0
1	23	0	2010	0	34	0	0	1	1	1	4	4	4	7.8408	0.974045	1	1	0	1	2	26	10	0	1	1	0
0	59	1	2010	0	35	0	0	1	1	0	4	4	4	7.8408	0.837952	0	0	0	1	2	82	3	0	0	1	0
0	79	1	2010	0	29	0	0	1	0	1	4	4	4	7.8408	0.891279	0	0	0	1	3	52	16	0	0	1	1
0	43	1	2010	0	26	0	0	1	0	1	0	0	0	0	0.0375495	0	0	0	3	3	68	1	1	0	1	0
0	27	1	2010	0	17	0	0	1	0	0	4	4	4	7.8408	0.99283	0	0	0	1	3	80	11	0	0	1	0
0	67	1	2010	0	27	1	0	1	0	1	4	4	4	7.8408	0.905293	0	0	1	1	3	41	18	0	0	0	1
1	71	0	2010	0	41	0	0	1	0	0	4	4	3	7.55	0.71192	0	1	0	1	3	46	3	1	1	1	0
0	59	0	2010	0	38	1	0	0	0	1	0	4	3	3.8028	0.0800827	0	0	0	3	3	42	2	1	1	0	0
0	66	1	2010	0	16	0	0	0	0	0	4	4	4	7.8408	0.956987	0	0	1	2	3	95	1	0	0	1	0
0	62	0	2010	0	22	0	0	1	0	1	4	4	4	7.8408	0.933484	0	0	0	1	3	64	11	0	0	0	0
0	67	1	2010	0	41	0	0	1	1	0	4	4	4	7.8408	0.765355	0	0	1	1	3	26	3	1	0	1	1
0	57	1	2010	0	18	0	0	1	0	0	2	4	3	5.6764	0.707436	1	0	0	1	3	91	16	0	1	1	0
0	27	1	2010	0	27	1	0	0	0	0	4	4	4	7.8408	0.984673	0	0	1	2	3	47	11	0	0	1	0
0	24	1	2010	0	29	1	0	0	0	0	0	4	4	4.0936	0.606527	0	0	0	3	3	21	2	1	1	0	0
0	57	0	2010	0	21	0	0	1	0	0	4	4	4	7.8408	0.938097	1	0	0	3	3	47	9	0	0	0	0
0	28	1	2010	0	16	0	0	0	1	0	4	3	4	7.1082	0.986722	0	0	1	3	3	29	18	0	0	0	1
0	77	1	2010	0	21	1	0	0	0	0	4	4	4	7.8408	0.938097	0	0	1	1	3	26	4	0	0	1	0
0	56	1	2010	0	45	1	0	1	0	0	2	3	3	4.9438	0.131262	0	0	0	1	3	28	11	0	1	0	1
0	78	1	2010	0	25	1	0	0	0	0	0	4	4	4.0936	0.23771	0	0	0	2	3	51	3	1	0	0	0
0	19	1	2010	0	21	1	0	0	0	0	4	4	4	7.8408	0.990277	0	0	0	2	3	35	13	0	0	1	0
0	83	1	2010	0	25	1	0	0	0	0	4	4	4	7.8408	0.917668	0	0	0	1	3	54	1	0	0	0	0
0	55	1	2010	0	21	0	0	1	0	0	4	4	4	7.8408	0.938097	0	0	1	2	3	53	5	0	0	0	0
0	37	1	2010	0	18	0	0	1	0	1	4	4	4	7.8408	0.992262	0	0	0	1	3	55	3	0	0	1	0
0	16	1	2010	0	17	1	0	0	0	0	3	4	4	6.904	0.982649	0	0	1	1	3	23	3	0	0	0	0
0	46	1	2010	0	38	1	0	1	0	0	4	4	3	7.55	0.954364	0	0	1	1	3	42	26	0	1	1	0
0	58	1	2010	0	25	1	0	0	0	0	3	4	4	6.904	0.820094	2	0	0	1	3	61	23	0	0	1	0
0	83	1	2010	0	42	1	0	1	0	0	2	4	4	5.9672	0.335657	0	0	0	2	3	74	3	1	0	0	0
0	76	0	2010	0	29	1	0	0	0	1	4	4	4	7.8408	0.891279	0	0	0	1	3	43	7	0	0	0	0
0	81	0	2010	0	36	1	0	1	0	0	4	4	3	7.55	0.783932	0	0	0	2	4	49	12	0	0	1	0
0	53	1	2010	0	25	1	1	0	0	0	4	4	4	7.8408	0.986827	0	0	1	1	4	41	12	0	1	0	0
0	55	0	2010	0	26	1	0	1	0	0	4	4	4	7.8408	0.911676	0	0	1	2	4	69	5	0	0	1	0
0	63	0	2010	0	18	0	0	1	0	1	4	4	4	7.8408	0.950201	0	0	0	1	4	38	9	0	0	0	0
0	72	1	2010	0	17	1	0	0	0	0	4	4	4	7.8408	0.953712	0	0	1	2	4	64	27	0	1	0	0
0	75	0	2010	0	16	1	0	0	0	0	4	4	4	7.8408	0.956987	0	0	0	1	4	49	1	0	0	0	0
0	60	1	2010	0	17	1	0	0	0	0	4	4	4	7.8408	0.953712	2	0	0	1	4	80	26	0	0	1	0
0	80	1	2010	0	26	1	0	0	0	0	2	4	4	5.9672	0.63323	0	0	1	3	4	44	47	0	0	0	0
0	24	1	2010	0	17	1	0	0	0	0	4	4	4	7.8408	0.99283	0	0	1	2	4	41	3	0	0	1	0
0	76	1	2010	0	57	1	0	1	1	0	2	4	4	5.9672	0.137677	0	0	0	1	4	66	37	0	1	1	1
0	85	0	2011	0	57	1	0	1	0	1	4	3	4	7.1082	0.32175	0	0	0	2	4	24	13	0	0	0	1
1	64	0	2011	0	41	0	0	1	0	0	3	4	3	6.6132	0.50266	1	0	1	2	4	39	21	1	1	1	0
1	59	0	2011	0	29	0	0	0	0	0	4	4	4	7.8408	0.891279	1	1	1	1	4	31	27	1	1	1	0
0	42	1	2011	0	26	1	0	0	0	0	3	4	4	6.904	0.965954	0	0	0	2	4	32	7	0	1	0	0
0	85	0	2011	0	25	1	0	0	0	0	2	4	4	5.9672	0.650878	0	0	0	1	4	35	15	1	0	0	0
0	29	0	2011	0	41	0	0	0	1	1	4	2	4	6.3756	0.844104	0	0	0	3	4	78	13	0	0	1	1
0	59	0	2011	0	16	1	0	0	0	0	4	4	4	7.8408	0.956987	0	0	0	1	4	74	1	0	0	1	0
0	80	1	2011	0	42	1	0	1	0	0	2	2	2	3.9204	0.0668454	0	0	1	1	4	85	2	1	1	1	0
0	88	1	2011	0	16	1	0	0	0	0	4	4	4	7.8408	0.956987	0	0	1	2	4	48	1	0	0	0	0
0	19	0	2011	0	16	0	0	1	0	0	4	4	4	7.8408	0.993357	0	0	0	1	4	112	4	0	0	1	0
0	73	1	2011	0	29	1	0	0	1	0	4	4	4	7.8408	0.891279	0	0	0	2	4	29	9	0	0	0	0
0	64	1	2011	0	45	0	0	1	1	0	4	4	4	7.8408	0.705799	0	0	0	2	4	40	17	0	0	1	0
0	71	1	2011	0	45	1	0	1	0	0	3	4	3	6.6132	0.426398	0	0	0	1	4	100	25	0	1	1	0
0	47	1	2011	0	34	1	0	1	0	1	4	4	4	7.8408	0.974045	0	0	0	2	4	152	7	0	0	1	1
0	80	1	2011	0	20	1	0	0	0	0	4	4	4	7.8408	0.942409	0	0	1	2	4	53	10	0	0	1	0
0	40	0	2011	0	25	1	0	0	0	0	0	4	4	4.0936	0.676982	0	0	1	2	1	22	7	1	0	0	0
0	56	1	2011	0	25	1	1	0	0	0	4	4	4	7.8408	0.917668	1	1	0	2	1	67	4	0	1	1	1
0	44	1	2011	0	38	1	0	1	0	0	4	4	3	7.55	0.954364	0	0	0	3	1	42	10	0	1	1	0
0	81	1	2011	0	45	1	0	1	0	0	0	4	4	4.0936	0.0628975	0	0	0	1	1	106	2	1	1	1	0
0	88	1	2011	0	16	1	0	0	0	0	3	4	4	6.904	0.900983	0	0	1	1	1	70	2	1	0	0	0
0	74	1	2011	0	25	0	0	1	0	0	4	4	4	7.8408	0.917668	0	0	1	1	1	35	8	0	0	0	0
0	63	0	2011	0	16	1	0	0	0	0	4	4	4	7.8408	0.956987	1	1	0	2	1	47	7	1	0	0	0
1	16	0	2011	0	25	0	0	1	0	1	3	4	4	6.904	0.968391	0	0	0	2	1	38	3	0	0	0	0
1	47	1	2011	0	24	0	0	1	0	0	3	4	4	6.904	0.970659	1	1	1	3	1	31	2	0	1	0	0
0	74	0	2011	0	26	1	0	0	0	0	4	4	4	7.8408	0.911676	0	0	1	2	1	176	7	0	0	0	0
0	61	1	2011	0	24	1	0	0	0	0	3	4	4	6.904	0.831148	0	0	0	1	1	28	7	0	0	1	0
0	56	1	2011	0	41	1	0	1	1	0	3	4	4	6.904	0.57155	0	0	0	3	1	30	2	1	1	0	1
1	35	0	2011	0	33	0	0	1	0	1	4	4	4	7.8408	0.975917	0	1	1	2	1	73	13	0	0	1	1
0	67	1	2011	0	18	0	0	1	0	0	4	4	3	7.55	0.935302	1	0	0	2	1	103	13	0	0	1	0
0	81	0	2011	0	21	0	0	1	0	0	4	4	4	7.8408	0.938097	0	0	0	2	1	23	5	0	0	0	0
0	51	1	2011	0	22	1	0	0	0	1	4	4	4	7.8408	0.989509	0	0	0	1	1	36	19	0	1	1	0
0	50	1	2011	0	24	0	0	1	0	0	4	4	4	7.8408	0.987788	0	0	0	1	1	111	8	0	0	1	0
0	80	1	2011	0	16	0	0	0	0	1	4	4	4	7.8408	0.956987	2	0	0	1	1	89	4	0	0	1	1
0	71	1	2011	0	17	0	0	1	0	0	4	4	4	7.8408	0.953712	0	0	0	2	1	172	9	0	0	1	0
1	62	1	2011	0	50	0	0	1	0	0	3	4	4	6.904	0.400586	0	0	0	2	1	76	3	1	1	1	0
1	28	1	2011	0	25	0	0	1	0	1	3	2	4	5.4388	0.883274	2	0	0	2	1	39	16	0	0	0	0
0	41	1	2011	0	34	1	0	1	1	0	0	1	2	1.3142	0.068885	0	0	1	3	1	35	2	1	1	0	0
0	85	1	2011	0	21	0	0	1	0	0	4	4	4	7.8408	0.938097	0	0	1	2	1	59	6	0	0	1	0
0	58	1	2011	0	29	1	0	1	0	0	4	4	4	7.8408	0.891279	0	0	1	1	1	109	3	0	0	1	0
0	54	0	2011	0	29	0	0	1	1	0	4	4	4	7.8408	0.982174	0	0	1	1	1	49	7	0	0	0	0
0	58	1	2011	0	25	1	0	0	0	0	0	4	4	4.0936	0.23771	0	1	0	3	1	76	8	0	1	1	1
0	61	1	2011	0	20	0	0	1	0	0	4	4	4	7.8408	0.942409	0	0	0	1	1	37	1	0	0	0	0
1	20	1	2011	0	43	1	0	1	0	1	2	2	4	4.502	0.437161	0	0	0	1	1	38	2	1	1	1	0
0	65	1	2011	0	24	0	0	1	0	0	4	4	4	7.8408	0.923288	1	0	0	1	1	94	25	0	0	1	0
0	68	1	2011	0	26	0	0	1	0	1	4	4	4	7.8408	0.911676	0	0	1	1	1	92	8	0	0	1	0
0	70	1	2011	0	24	0	0	1	0	0	4	4	4	7.8408	0.923288	1	0	1	3	1	56	4	0	0	1	0
0	74	1	2011	0	45	1	0	1	0	0	3	4	4	6.904	0.495245	0	0	1	1	1	39	12	0	1	1	0
0	67	0	2011	0	25	1	0	0	0	0	0	4	4	4.0936	0.23771	0	0	0	3	2	48	2	0	0	0	0
0	78	1	2011	0	25	1	0	1	0	0	4	4	4	7.8408	0.917668	0	0	0	1	2	96	4	0	0	1	0
0	63	1	2011	0	18	0	0	1	0	0	4	4	4	7.8408	0.950201	0	0	1	2	2	46	25	0	0	0	1
0	58	1	2011	0	50	1	0	1	0	1	4	4	4	7.8408	0.620357	0	0	1	1	2	135	14	0	0	1	1
0	25	1	2011	0	45	1	0	1	0	0	4	4	4	7.8408	0.941601	0	0	0	2	2	82	4	0	0	0	0
0	93	1	2011	0	25	0	0	0	0	1	4	4	4	7.8408	0.917668	0	0	1	2	2	57	6	0	0	0	1
0	61	1	2011	0	33	0	0	1	0	0	4	4	4	7.8408	0.857743	2	0	1	1	2	121	20	0	0	1	0
0	38	1	2011	0	25	0	0	1	0	1	4	4	4	7.8408	0.986827	0	0	0	2	2	29	3	0	1	0	1
0	69	1	2011	0	21	1	0	0	0	0	4	4	4	7.8408	0.938097	0	0	0	2	2	50	12	0	0	0	0
0	69	1	2011	0	25	1	0	0	0	0	0	4	4	4.0936	0.23771	0	0	1	1	2	105	9	1	1	1	0
0	64	1	2011	0	21	0	0	1	0	0	4	4	4	7.8408	0.938097	0	0	0	1	2	30	3	0	0	0	0
0	60	1	2011	0	16	1	0	0	0	0	4	4	4	7.8408	0.956987	1	0	0	1	2	47	1	0	0	0	0
0	59	1	2011	0	38	1	0	1	0	0	4	4	4	7.8408	0.804187	0	0	0	2	2	83	11	0	0	1	0
0	16	1	2011	0	27	1	1	1	0	0	4	4	4	7.8408	0.984673	0	0	0	3	2	30	4	0	0	1	0
0	47	1	2011	0	22	1	0	1	0	0	2	4	3	5.6764	0.922797	0	0	0	1	2	53	3	0	1	1	0
1	31	1	2011	0	24	0	0	1	0	0	4	4	4	7.8408	0.987788	1	1	0	3	2	76	22	0	0	1	0
0	34	1	2011	0	24	0	0	1	0	0	4	4	4	7.8408	0.987788	3	0	0	1	2	43	18	0	0	1	0
0	55	1	2011	0	17	1	0	0	0	0	4	4	4	7.8408	0.953712	0	0	1	2	2	47	17	0	0	0	0
0	45	1	2011	0	26	0	0	1	0	1	4	4	4	7.8408	0.98579	2	0	0	1	2	84	6	0	0	1	0
0	83	0	2011	0	38	1	0	1	0	0	2	4	4	5.9672	0.407211	0	0	0	1	2	55	3	1	1	1	0
0	55	0	2011	0	25	0	0	1	0	0	4	4	4	7.8408	0.917668	0	0	0	3	2	87	17	0	1	0	0
0	83	1	2011	0	16	1	0	0	0	0	4	4	4	7.8408	0.956987	2	0	0	1	2	33	1	0	0	0	0
0	80	1	2011	0	18	0	0	1	1	0	4	4	4	7.8408	0.950201	0	0	0	2	2	65	30	0	0	0	0
0	68	1	2011	0	25	1	0	0	0	0	0	4	4	4.0936	0.23771	2	1	0	1	2	30	18	0	0	0	0
1	69	0	2011	0	20	0	0	0	1	0	3	3	4	6.1714	0.768843	1	0	0	1	2	82	18	0	0	0	0
0	24	0	2011	0	29	0	0	1	1	0	4	4	4	7.8408	0.982174	0	0	0	1	2	51	15	0	0	1	1
0	20	1	2011	0	50	1	0	1	0	1	0	3	3	3.0702	0.103696	0	0	0	1	2	45	2	1	1	1	0
1	16	1	2011	0	17	0	0	0	0	1	4	4	4	7.8408	0.99283	0	0	0	1	2	36	4	0	0	1	1
0	77	0	2011	0	34	0	0	1	1	1	4	4	3	7.55	0.808815	0	0	0	2	2	68	3	1	1	1	1
0	41	1	2011	0	18	0	0	1	0	0	4	4	4	7.8408	0.992262	0	0	0	1	2	71	14	0	0	1	0
0	29	1	2011	0	54	0	0	1	1	0	4	4	3	7.55	0.859547	0	0	1	1	2	96	2	1	1	1	1
0	55	1	2011	0	18	1	0	0	0	0	4	4	4	7.8408	0.950201	0	1	0	1	2	34	14	0	0	0	0
0	64	0	2011	0	36	1	0	1	0	0	4	4	4	7.8408	0.827251	0	0	0	2	2	58	4	0	0	1	0
0	72	0	2011	0	45	1	0	1	0	0	2	4	3	5.6764	0.233142	0	0	0	2	2	36	3	1	1	1	0
0	59	1	2011	0	29	0	0	1	0	1	4	4	4	7.8408	0.891279	0	0	1	1	2	83	14	0	0	1	1
0	22	1	2011	0	43	1	0	1	0	1	4	4	3	7.55	0.934401	0	0	0	3	2	102	24	0	0	1	1
1	53	1	2011	0	30	1	0	0	0	0	4	4	4	7.8408	0.980778	0	0	1	1	3	53	6	0	0	0	0
0	87	1	2011	0	16	1	0	0	0	0	4	4	4	7.8408	0.956987	0	0	0	1	3	50	1	0	0	0	0
0	86	0	2011	0	41	1	1	1	0	1	3	4	4	6.904	0.57155	0	0	0	2	3	108	10	0	0	1	0
1	46	1	2011	0	54	1	0	1	0	0	1	3	3	4.007	0.172226	1	0	0	2	3	19	57	0	1	1	0
0	52	1	2011	0	34	0	0	1	0	1	4	4	3	7.55	0.966024	0	0	0	1	3	31	2	1	1	1	1
0	19	1	2011	0	38	1	0	1	0	0	4	4	4	7.8408	0.965037	0	0	0	2	3	35	17	0	0	0	0
0	18	1	2011	0	43	1	0	1	0	1	1	4	4	5.0304	0.562574	0	0	1	2	3	84	1	0	1	0	0
0	19	1	2011	0	16	1	0	0	0	0	4	4	4	7.8408	0.993357	0	0	0	2	3	36	1	0	0	0	0
0	33	1	2011	0	18	0	0	1	0	0	4	4	3	7.55	0.989812	0	0	0	1	3	36	16	0	0	1	0
1	70	0	2011	0	75	1	0	0	0	0	0	0	0	0	0.000134709	0	0	0	1	3	35	1	1	0	1	0
0	20	1	2011	0	57	1	0	1	1	1	4	4	3	7.55	0.829365	0	0	1	1	3	99	26	0	1	1	1
0	81	0	2011	0	33	1	0	1	0	0	4	4	4	7.8408	0.857743	0	0	0	1	3	85	31	0	0	1	0
0	59	1	2011	0	30	1	0	0	0	0	4	4	4	7.8408	0.88361	0	0	1	1	3	32	28	0	0	1	0
0	83	1	2011	0	20	0	0	1	0	0	4	4	4	7.8408	0.942409	0	0	0	1	3	56	25	0	0	0	0
0	22	0	2011	0	26	0	0	1	0	0	4	4	4	7.8408	0.98579	0	0	0	1	3	41	6	0	0	0	0
0	82	0	2011	0	50	1	0	1	0	1	4	4	4	7.8408	0.620357	0	0	1	1	3	33	22	0	1	1	1
0	66	0	2011	0	34	0	1	1	0	1	4	4	4	7.8408	0.848112	0	0	0	3	3	53	22	0	1	1	1
0	84	1	2011	0	20	1	0	0	0	0	4	4	4	7.8408	0.942409	0	0	0	1	3	26	1	0	0	0	0
0	79	0	2011	0	48	1	1	1	0	0	4	4	3	7.55	0.590763	0	0	0	1	3	71	6	0	1	0	1
0	61	1	2011	0	21	1	0	0	0	0	4	4	4	7.8408	0.938097	0	0	1	1	3	34	5	0	0	0	0
0	79	0	2011	0	17	0	0	1	0	0	4	4	4	7.8408	0.953712	0	0	1	1	3	122	12	0	0	0	0
0	72	0	2011	0	45	1	0	1	0	0	4	4	4	7.8408	0.705799	0	0	1	1	3	113	11	0	1	1	0
0	39	1	2011	0	29	1	0	1	0	0	4	4	4	7.8408	0.982174	0	0	0	1	3	76	19	0	1	1	1
0	40	1	2011	0	75	0	0	1	0	1	4	3	3	6.8174	0.377429	0	0	0	1	3	99	3	1	1	1	1
1	62	1	2011	0	75	0	0	0	0	0	4	3	3	6.8174	0.0827399	3	0	0	3	3	21	2	1	1	0	0
0	58	0	2011	0	22	0	1	1	0	0	4	4	4	7.8408	0.933484	0	0	0	1	3	62	4	0	0	1	0
0	67	1	2011	0	18	1	0	1	0	0	4	4	4	7.8408	0.950201	2	0	0	1	3	36	14	0	0	0	0
0	61	1	2011	0	50	0	0	1	0	0	4	4	4	7.8408	0.620357	0	0	0	1	3	48	12	1	1	1	0
0	59	1	2011	0	29	1	1	0	0	0	0	4	2	3.512	0.116339	0	0	0	1	3	72	4	1	1	1	0
0	85	0	2011	0	30	0	0	0	0	1	4	3	4	7.1082	0.790489	1	0	0	2	3	39	19	0	0	0	1
1	23	1	2011	0	34	0	0	1	0	0	4	4	4	7.8408	0.974045	0	0	0	3	3	76	41	0	1	1	0
0	31	1	2011	0	75	1	0	0	0	0	0	0	0	0	0.00090466	0	0	0	1	3	90	1	1	0	1	0
0	75	1	2011	0	26	1	0	0	0	0	2	4	4	5.9672	0.63323	0	0	0	2	3	59	1	0	0	1	0
0	47	1	2011	0	45	1	0	1	0	0	1	4	4	5.0304	0.524484	0	0	0	3	4	42	11	0	1	0	0
0	79	1	2011	0	25	1	0	0	0	0	3	4	4	6.904	0.820094	4	0	0	2	4	54	1	0	0	0	0
0	55	1	2011	0	34	1	0	1	0	1	4	4	4	7.8408	0.848112	0	0	0	2	4	66	6	0	0	1	0
0	45	1	2011	0	18	0	0	1	1	0	4	4	3	7.55	0.989812	0	0	0	1	4	100	12	0	0	1	0
0	71	1	2012	0	41	1	0	0	0	1	0	4	3	3.8028	0.06467	0	0	0	2	4	82	2	1	0	0	0
0	17	1	2012	0	18	1	0	0	0	0	3	4	4	6.904	0.98129	0	0	1	1	4	27	15	0	0	1	0
0	59	1	2012	0	34	1	1	1	0	0	3	4	4	6.904	0.69546	0	0	1	3	4	66	5	0	0	0	0
0	18	0	2012	0	19	1	1	0	0	0	4	4	4	7.8408	0.99165	0	0	0	2	4	45	4	0	0	1	0
0	74	0	2012	0	25	0	0	1	0	0	0	4	4	4.0936	0.23771	0	0	0	3	4	42	12	0	1	0	0
0	79	1	2012	0	16	1	0	0	0	0	4	4	4	7.8408	0.95699	0	0	0	3	4	34	1	0	0	0	0
0	81	0	2012	0	45	0	0	1	0	1	3	4	3	6.6132	0.4264	0	0	0	2	4	35	72	1	1	1	1
0	76	1	2012	0	27	1	0	0	0	0	3	4	4	6.904	0.79631	0	0	0	1	4	84	67	0	1	1	0
0	33	0	2012	0	16	0	0	1	0	0	4	4	4	7.8408	0.99336	0	0	1	2	4	97	7	0	1	0	0
0	60	0	2012	0	16	0	0	1	0	0	4	4	4	7.8408	0.95699	0	0	1	2	4	95	12	0	1	1	0
0	80	1	2012	0	20	1	0	0	0	0	4	4	4	7.8408	0.94241	0	0	0	1	4	32	3	0	0	0	0
0	65	1	2012	0	29	1	0	1	0	0	4	4	4	7.8408	0.89128	0	0	0	1	4	97	19	0	0	1	0
0	80	1	2012	0	17	1	0	0	0	0	4	4	4	7.8408	0.95371	0	0	0	1	4	39	5	0	0	0	0
0	64	1	2012	0	17	0	0	1	0	0	4	4	4	7.8408	0.95371	0	0	1	1	4	78	19	0	1	1	0
0	34	0	2012	0	20	1	0	0	0	0	4	4	4	7.8408	0.99099	0	0	1	1	4	56	5	0	0	1	0
0	77	0	2012	0	27	1	0	1	0	1	4	4	4	7.8408	0.90529	0	0	0	2	4	35	8	0	0	0	0
0	60	0	2012	0	26	0	0	1	0	0	4	4	4	7.8408	0.91168	0	0	0	3	4	49	31	0	1	1	0
0	79	1	2012	0	25	1	0	1	0	0	2	4	4	5.9672	0.65088	0	0	0	2	4	18	11	0	0	0	0
0	58	1	2012	0	36	1	0	1	0	0	3	3	4	6.1714	0.49325	0	1	1	3	4	29	5	0	0	0	0
0	60	1	2012	0	17	0	0	0	1	0	4	4	4	7.8408	0.95371	1	0	1	3	4	92	18	0	0	0	0
0	58	1	2012	0	26	1	0	0	0	0	4	4	4	7.8408	0.91168	0	0	0	1	4	73	6	0	0	1	0
0	56	1	2012	0	26	0	0	1	0	1	4	4	4	7.8408	0.91168	0	0	0	1	4	81	14	0	0	1	0
0	55	1	2012	0	30	1	0	0	0	0	4	4	4	7.8408	0.88361	0	0	0	1	4	67	9	0	0	1	0
0	87	0	2012	0	16	1	0	0	0	0	4	4	4	7.8408	0.95699	0	0	1	2	1	31	1	0	0	0	0
0	90	0	2012	0	16	1	0	0	0	0	4	4	4	7.8408	0.95699	0	0	0	2	1	38	3	0	0	0	0
0	77	0	2012	0	25	1	0	0	0	0	0	4	4	4.0936	0.23771	0	0	0	1	1	83	2	1	0	0	0
1	25	0	2012	0	29	0	0	0	1	1	4	4	4	7.8408	0.98217	1	1	1	2	1	59	20	0	1	0	1
0	25	1	2012	0	27	0	0	1	0	0	4	4	4	7.8408	0.98467	0	0	0	1	1	108	10	0	0	1	0
0	87	1	2012	0	29	1	0	1	0	0	4	4	3	7.55	0.86132	0	0	1	1	1	54	9	0	0	1	0
0	79	0	2012	0	16	0	0	1	0	0	4	4	4	7.8408	0.95699	0	0	0	1	1	97	1	0	0	1	0
0	31	1	2012	0	75	0	0	1	0	1	0	0	0	0	0.0009	0	0	0	1	1	107	1	1	0	1	0
1	58	0	2012	0	50	0	0	1	0	0	4	4	4	7.8408	0.62036	0	1	1	3	1	81	50	1	1	1	0
0	69	1	2012	0	26	0	0	1	0	0	4	4	4	7.8408	0.91168	1	1	0	1	1	46	13	0	0	0	0
0	52	1	2012	0	20	0	0	1	0	0	4	4	4	7.8408	0.99099	0	0	1	1	1	56	4	0	0	0	0
0	71	0	2012	0	75	0	0	1	0	0	2	4	3	5.6764	0.02946	0	0	0	2	1	51	4	1	1	1	0
1	17	0	2012	0	50	1	0	1	0	1	2	4	4	5.9672	0.64751	0	0	1	3	1	18	62	0	1	0	0
0	61	1	2012	0	45	1	0	1	0	0	3	4	4	6.904	0.49524	0	0	0	1	1	99	63	0	1	1	0
0	20	1	2012	0	42	1	0	1	0	0	1	4	3	4.7396	0.51272	0	0	0	2	1	32	10	0	1	0	0
0	70	0	2012	0	19	0	1	0	0	1	4	4	4	7.8408	0.94644	0	0	0	1	1	82	3	0	0	1	0
0	18	1	2012	0	29	1	0	1	0	0	2	4	4	5.9672	0.90211	0	0	0	2	1	79	1	0	0	1	0
1	64	0	2012	0	29	0	0	0	0	0	4	4	4	7.8408	0.89128	0	0	0	3	1	120	67	0	1	1	0
0	85	1	2012	0	25	1	0	0	0	0	2	4	4	5.9672	0.65088	1	0	0	3	1	68	5	0	1	0	0
0	82	1	2012	0	16	1	0	0	0	0	4	4	4	7.8408	0.95699	0	0	0	1	1	41	5	0	0	0	0
1	26	1	2012	0	34	0	0	1	0	0	1	4	3	4.7396	0.66045	1	1	0	3	1	78	2	1	1	1	0
0	67	1	2012	0	21	0	0	1	0	0	4	4	4	7.8408	0.9381	0	0	0	1	1	43	5	0	0	1	0
0	30	1	2012	0	24	0	0	1	0	0	4	4	4	7.8408	0.98779	0	0	1	1	1	111	9	0	0	1	0
0	74	0	2012	0	75	0	0	1	0	0	4	4	4	7.8408	0.19326	0	0	0	3	1	48	4	1	1	1	0
0	83	1	2012	0	29	1	0	1	0	0	4	4	4	7.8408	0.89128	0	0	0	1	1	59	54	0	0	0	0
1	30	1	2012	0	75	1	0	0	0	1	0	0	0	0	0.0009	0	0	0	3	1	37	1	1	0	1	0
0	57	1	2012	0	26	0	0	1	1	0	4	4	4	7.8408	0.91168	0	0	1	3	1	40	26	0	0	0	0
0	74	1	2012	0	16	1	0	0	0	0	4	4	4	7.8408	0.95699	1	0	1	1	1	35	1	0	0	0	0
0	89	1	2012	0	21	0	0	1	0	0	4	3	4	7.1082	0.88279	0	0	0	1	1	56	10	0	0	0	0
0	73	1	2012	0	16	0	0	1	0	0	3	4	4	6.904	0.90098	0	0	0	2	1	49	57	0	1	1	0
1	74	0	2012	0	41	1	0	1	1	1	4	4	3	7.55	0.71192	1	1	0	1	1	32	1	1	1	0	0
0	56	1	2012	0	20	0	0	1	0	0	4	4	4	7.8408	0.94241	0	0	1	3	1	34	3	0	0	0	0
0	72	0	2012	0	30	1	0	0	0	0	4	4	4	7.8408	0.88361	0	0	1	2	1	81	5	0	0	1	0
0	80	1	2012	0	20	0	0	1	0	0	4	4	4	7.8408	0.94241	4	0	0	1	2	101	23	0	0	1	0
0	26	1	2012	0	26	1	0	1	0	0	4	4	4	7.8408	0.98579	0	0	0	2	2	95	8	0	0	1	0
0	72	1	2012	0	25	1	0	0	0	0	2	4	4	5.9672	0.65088	1	1	0	1	2	79	3	1	0	0	0
0	53	1	2012	0	25	1	0	0	0	0	2	4	3	5.6764	0.9047	0	0	0	1	2	78	12	0	1	1	0
0	22	1	2012	0	75	1	1	0	0	1	0	4	4	4.0936	0.0431	0	0	0	1	2	41	2	1	1	1	0
0	54	1	2012	1	26	1	0	0	0	0	4	4	4	7.8408	0.98579	0	0	0	1	2	73	14	0	0	1	0
0	32	0	2012	0	18	0	0	1	0	0	1	4	4	5.0304	0.89767	0	0	0	3	2	88	5	0	0	1	0
0	74	1	2012	0	18	0	0	0	1	1	4	4	4	7.8408	0.9502	1	0	0	1	2	98	38	0	0	1	1
0	61	1	2012	0	16	1	0	0	0	0	2	4	4	5.9672	0.7882	0	0	1	3	2	52	3	0	0	0	0
0	69	0	2012	0	38	0	0	1	0	1	3	2	3	5.148	0.23915	0	1	1	3	2	25	27	0	1	0	0
0	69	1	2012	0	25	1	0	0	0	0	4	4	4	7.8408	0.91767	0	0	0	1	2	110	6	0	0	0	0
0	64	1	2012	0	25	0	0	1	0	0	4	2	4	6.3756	0.73354	0	0	0	1	2	87	19	0	0	1	0
1	25	1	2012	0	24	0	0	1	0	0	4	4	4	7.8408	0.98779	0	1	0	2	2	24	6	0	0	0	0
0	46	1	2012	0	16	1	0	0	0	0	4	4	4	7.8408	0.99336	0	0	0	1	2	38	1	0	0	0	0
0	69	1	2012	0	29	1	0	1	0	0	4	4	4	7.8408	0.89128	0	0	0	1	2	91	22	0	0	1	0
0	82	0	2012	0	57	1	0	1	0	1	0	4	4	4.0936	0.02601	0	0	1	2	2	54	55	0	1	1	1
0	19	1	2012	0	30	1	0	0	0	0	0	4	4	4.0936	0.58806	0	0	1	2	2	106	48	0	1	1	0
0	51	1	2012	0	26	1	0	0	0	0	1	4	3	4.7396	0.7824	0	0	0	1	2	30	1	0	0	1	0
0	76	1	2012	0	34	1	0	0	0	1	4	4	3	7.55	0.80882	0	0	0	2	2	108	13	1	0	1	0
0	50	1	2012	0	29	0	0	1	0	1	4	3	4	7.1082	0.96477	0	0	0	1	2	38	22	0	1	0	1
0	75	1	2012	0	27	1	0	0	0	0	3	4	4	6.904	0.79631	0	0	1	2	2	111	4	0	0	0	0
0	63	1	2012	0	16	0	0	0	0	1	4	4	4	7.8408	0.95699	0	0	0	2	2	45	6	0	0	0	1
0	36	0	2012	0	45	1	0	1	0	0	3	4	4	6.904	0.86832	0	0	1	3	2	48	9	0	0	1	0
0	70	1	2012	0	34	1	0	1	0	1	4	4	4	7.8408	0.84811	0	0	0	1	2	30	4	0	0	0	0
0	88	0	2012	0	25	0	0	1	0	1	4	4	4	7.8408	0.91767	0	0	0	1	2	121	5	0	0	1	0
0	70	0	2012	0	29	1	0	0	0	0	2	4	4	5.9672	0.57828	0	0	0	1	2	58	31	0	0	1	0
0	31	1	2012	0	21	1	0	0	0	0	4	4	4	7.8408	0.99028	0	0	0	1	2	72	8	0	0	1	0
0	83	0	2012	0	16	1	0	0	0	0	4	4	4	7.8408	0.95699	0	0	0	1	2	30	3	0	0	0	0
0	96	1	2012	0	38	0	0	1	1	0	0	3	4	3.361	0.05402	0	0	0	1	2	32	2	1	1	1	1
0	80	0	2012	0	19	0	0	0	1	1	4	4	4	7.8408	0.94644	0	0	0	1	2	96	22	0	1	1	0
0	63	1	2012	0	34	1	0	1	0	1	4	4	4	7.8408	0.84811	0	0	0	1	2	66	16	0	0	0	0
0	79	0	2012	0	16	1	0	0	0	0	4	4	4	7.8408	0.95699	0	0	0	1	2	23	5	0	0	0	0
0	84	1	2012	0	27	1	0	0	0	0	4	4	4	7.8408	0.90529	2	0	0	1	2	37	8	1	0	0	0
0	50	1	2012	0	38	1	0	1	0	0	1	4	3	4.7396	0.58857	0	0	1	2	2	36	6	1	1	0	0
0	69	1	2012	0	21	1	0	0	0	0	4	4	3	7.55	0.91988	0	0	0	1	2	42	6	0	0	0	0
0	72	0	2012	0	45	1	0	1	0	0	4	4	4	7.8408	0.7058	0	0	0	3	2	98	9	1	1	1	0
0	20	1	2012	0	17	1	0	0	0	0	4	4	4	7.8408	0.99283	0	0	0	1	2	55	12	0	0	0	0
0	85	0	2012	0	16	1	0	0	0	0	4	4	4	7.8408	0.95699	0	0	1	2	2	68	1	0	0	0	0
0	57	1	2012	0	17	0	0	1	0	0	4	4	4	7.8408	0.95371	0	0	0	3	2	55	4	0	0	1	0
0	56	1	2012	0	45	1	0	1	0	0	0	2	3	2.3376	0.0124	0	0	0	1	2	87	3	1	1	1	0
1	35	0	2012	0	20	0	0	1	0	0	3	4	4	6.904	0.97825	0	1	0	3	2	42	6	0	0	0	0
0	59	1	2012	0	36	1	0	1	0	0	4	4	3	7.55	0.78393	0	0	1	1	3	100	16	0	0	1	0
0	89	0	2012	0	25	1	0	0	0	0	3	4	4	6.904	0.82009	2	0	0	1	3	27	44	0	0	0	0
0	20	1	2012	0	17	1	0	0	0	0	4	4	4	7.8408	0.99283	0	0	0	1	3	48	8	0	0	1	0
1	64	0	2012	0	25	0	0	0	0	0	4	4	4	7.8408	0.91767	0	1	0	3	3	62	2	1	0	0	0
0	48	1	2012	0	50	0	0	1	0	1	0	0	0	0	0.00614	0	0	1	1	3	172	1	1	0	1	0
0	72	1	2012	0	26	0	0	1	1	0	4	4	4	7.8408	0.91168	0	0	0	1	3	28	7	0	0	0	0
0	76	1	2012	0	34	0	0	1	1	1	0	2	4	2.6284	0.03715	0	0	1	1	3	110	2	1	1	1	1
0	60	0	2012	0	45	1	0	1	0	0	0	4	4	4.0936	0.0629	0	0	0	1	3	83	46	0	1	1	0
1	77	1	2012	0	34	1	0	1	0	1	3	4	4	6.904	0.69546	1	1	0	3	3	56	1	1	0	0	0
0	65	1	2012	0	17	0	0	0	0	1	4	4	4	7.8408	0.95371	0	0	0	2	3	83	3	0	0	1	1
0	57	1	2012	0	21	0	0	1	0	0	4	4	3	7.55	0.91988	0	0	0	3	3	31	6	0	0	0	0
1	32	0	2012	0	38	1	0	0	0	1	0	0	0	0	0.01529	0	0	0	1	3	13	1	1	0	1	0
0	86	1	2012	0	33	1	0	1	0	0	4	4	4	7.8408	0.85774	0	0	0	1	3	75	59	0	0	1	0
0	40	1	2012	0	24	0	0	1	0	0	4	4	3	7.55	0.98394	0	0	0	1	3	44	23	0	0	0	0
0	81	0	2012	0	25	1	0	0	0	0	0	4	4	4.0936	0.23771	0	0	1	1	3	42	5	1	0	0	0
0	55	0	2012	0	32	1	0	1	0	0	4	4	4	7.8408	0.86686	0	0	1	1	3	53	20	0	0	0	0
1	28	0	2012	0	34	0	0	1	1	1	3	3	3	5.8806	0.85249	0	1	1	3	3	28	16	0	1	0	1
0	87	0	2012	0	42	1	0	1	0	0	3	4	4	6.904	0.55265	0	0	1	1	3	18	3	1	1	0	0
0	64	0	2012	0	17	0	0	0	1	0	4	4	4	7.8408	0.95371	0	0	0	1	3	35	1	0	0	1	0
0	72	1	2012	0	24	0	0	1	0	0	4	4	4	7.8408	0.92329	2	0	0	3	3	90	8	0	0	0	0
0	64	1	2012	0	18	1	0	0	0	0	4	4	4	7.8408	0.9502	0	0	1	1	3	45	7	0	0	0	0
0	19	1	2012	0	34	1	0	1	0	1	4	4	4	7.8408	0.97404	0	0	1	3	3	45	13	0	0	0	1
0	54	1	2012	0	45	1	0	1	0	0	3	4	4	6.904	0.86832	1	0	0	1	3	40	4	0	0	1	0
0	46	1	2012	0	18	1	0	0	0	0	4	4	4	7.8408	0.99226	0	0	0	1	3	35	7	0	0	0	0
0	61	1	2012	0	16	0	0	1	0	0	4	4	4	7.8408	0.95699	0	0	0	2	3	75	6	0	0	0	0
0	71	0	2012	0	18	1	0	0	0	1	4	4	4	7.8408	0.9502	0	0	1	2	3	61	13	0	0	1	0
0	59	0	2012	0	45	1	0	1	0	0	2	4	4	5.9672	0.28636	1	0	0	2	3	70	84	0	1	1	0
0	52	0	2012	0	17	1	0	0	0	0	4	4	4	7.8408	0.99283	2	0	0	1	3	81	1	0	0	0	0
0	26	0	2012	0	25	1	0	0	0	0	2	4	4	5.9672	0.92609	0	0	0	3	3	47	111	0	1	0	0
0	90	0	2012	0	17	0	0	0	0	1	4	4	4	7.8408	0.95371	0	0	0	1	3	57	11	0	0	0	1
0	79	0	2012	0	18	0	0	1	0	0	4	4	4	7.8408	0.9502	0	0	1	2	3	49	11	0	0	0	0
0	58	1	2012	0	17	1	0	0	0	0	3	4	3	6.6132	0.86458	1	0	0	1	3	38	12	0	0	0	0
0	63	1	2012	0	25	1	0	0	0	0	3	4	4	6.904	0.82009	0	0	0	2	3	64	1	0	0	1	0
0	80	0	2012	0	16	1	0	0	0	0	4	4	4	7.8408	0.95699	0	0	0	1	3	39	3	0	0	0	0
0	63	0	2012	0	25	1	0	0	0	0	4	4	4	7.8408	0.91767	0	0	0	1	3	38	21	0	0	0	0
0	83	1	2012	0	16	0	0	0	0	0	4	4	4	7.8408	0.95699	1	0	1	2	3	72	85	1	0	0	0
0	62	1	2012	0	16	1	0	0	0	0	4	3	4	7.1082	0.91706	0	0	0	1	3	54	4	0	0	0	0
0	51	1	2012	0	18	0	0	0	1	0	0	3	4	3.361	0.64069	0	0	0	2	3	42	3	0	0	1	1
0	44	1	2012	0	17	1	0	0	0	0	4	4	4	7.8408	0.99283	0	0	0	1	3	45	1	0	0	0	0
0	62	1	2012	0	66	1	0	1	1	1	0	1	3	1.605	0.00124	3	0	0	2	3	29	40	0	1	0	1
0	29	1	2012	0	26	0	0	1	0	0	4	4	4	7.8408	0.98579	0	0	0	3	3	73	5	0	0	1	0
0	87	1	2012	0	26	1	0	0	0	0	4	4	4	7.8408	0.91168	0	0	0	1	3	78	1	0	0	0	0
0	49	1	2012	0	29	1	0	1	0	0	3	4	4	6.904	0.95751	0	0	0	3	3	22	9	0	0	0	0
0	17	0	2012	0	17	1	0	0	0	0	2	4	4	5.9672	0.95861	0	0	0	1	3	33	52	0	1	1	0
0	72	1	2012	0	24	0	0	1	0	0	4	4	4	7.8408	0.92329	0	0	0	1	3	87	28	0	0	1	0
0	64	1	2012	0	26	1	0	0	0	0	4	4	4	7.8408	0.91168	0	0	1	3	4	58	6	0	0	0	0
0	31	1	2012	0	45	1	0	1	0	0	3	4	3	6.6132	0.83322	1	0	1	2	4	97	43	0	1	0	1
0	85	0	2012	0	35	1	0	1	0	0	1	4	4	5.0304	0.26131	0	0	0	1	4	22	2	1	1	0	0
0	82	0	2012	0	38	0	0	1	0	1	4	4	4	7.8408	0.80419	0	0	0	2	4	40	64	0	1	0	1
0	40	0	2012	0	29	0	0	1	0	1	4	4	3	7.55	0.9766	2	0	1	1	4	145	16	0	0	1	0
0	76	1	2012	0	25	1	0	0	0	0	4	4	4	7.8408	0.91767	0	0	0	1	4	54	1	0	0	0	0
0	69	1	2012	0	16	0	0	1	0	0	4	4	4	7.8408	0.95699	0	0	0	1	4	52	11	0	0	0	0
0	84	1	2012	0	35	1	0	1	0	0	4	4	4	7.8408	0.83795	0	0	0	1	4	77	1	0	0	1	0
0	60	1	2012	0	34	1	0	0	0	1	0	4	4	4.0936	0.13511	0	0	1	2	4	25	2	1	1	0	0
0	80	1	2012	0	36	1	0	1	0	0	3	4	4	6.904	0.66199	3	0	0	1	4	33	3	0	0	1	0
0	79	1	2012	0	43	1	0	1	0	1	1	4	4	5.0304	0.16062	3	0	0	1	4	92	2	1	1	1	0
0	20	0	2012	0	29	0	0	1	0	1	4	4	4	7.8408	0.98217	0	0	0	2	4	42	38	0	0	0	1
0	72	1	2013	0	16	1	0	0	0	0	4	4	4	7.8408	0.95699	0	0	0	3	4	42	1	0	0	0	0
0	87	0	2013	0	25	1	0	0	0	0	3	4	4	6.904	0.82009	0	0	1	1	4	34	4	0	0	0	0
0	77	0	2013	0	17	1	0	0	0	0	3	4	4	6.904	0.89392	0	0	0	1	4	28	6	0	0	0	0
0	78	1	2013	0	17	1	0	0	0	0	4	4	4	7.8408	0.95371	1	0	1	2	4	66	1	0	0	0	0
0	83	1	2013	0	16	0	0	1	0	0	4	4	4	7.8408	0.95699	0	0	0	3	4	97	2	0	0	0	0
0	77	1	2013	0	17	0	1	0	0	0	4	4	4	7.8408	0.95371	0	0	0	1	4	54	8	0	1	1	0
0	54	1	2013	0	18	1	0	1	0	0	4	4	4	7.8408	0.99226	0	0	1	3	4	46	11	0	0	0	0
0	80	1	2013	0	25	1	0	0	0	0	4	4	4	7.8408	0.91767	1	0	1	1	4	35	1	0	0	0	0
0	70	0	2013	0	17	1	0	0	0	0	4	4	4	7.8408	0.95371	1	1	0	1	4	77	6	0	0	0	0
0	65	1	2013	0	17	1	0	0	0	0	4	4	4	7.8408	0.95371	0	0	0	2	4	84	24	0	0	0	0
0	63	1	2013	0	17	1	0	0	0	0	4	4	4	7.8408	0.95371	0	0	0	2	4	109	1	0	0	1	0
0	76	1	2013	0	36	1	0	1	0	0	4	4	4	7.8408	0.82725	0	0	1	1	4	47	18	0	0	1	0
0	87	0	2013	0	16	1	0	0	0	0	3	4	4	6.904	0.90098	0	0	0	1	4	39	1	0	0	0	0
0	57	1	2013	0	21	1	0	0	0	0	4	4	4	7.8408	0.9381	0	1	0	2	4	41	4	0	0	0	0
0	68	1	2013	0	29	1	0	1	0	0	4	4	3	7.55	0.86132	0	0	0	1	4	50	30	0	0	1	0
1	63	1	2013	0	26	0	0	0	0	0	3	4	3	6.6132	0.76181	0	0	0	1	4	57	2	1	1	1	0
0	53	1	2013	0	20	1	0	0	0	0	4	4	4	7.8408	0.99099	0	0	0	2	1	91	55	0	0	1	0
0	63	0	2013	0	26	0	0	1	0	0	4	4	4	7.8408	0.91168	0	1	0	2	1	38	38	0	1	0	0
0	62	1	2013	0	21	1	0	0	0	0	4	4	3	7.55	0.91988	0	0	1	2	1	33	6	0	0	0	0
0	63	1	2013	0	21	1	0	0	0	0	4	4	4	7.8408	0.9381	0	0	0	2	1	68	4	0	0	1	0
0	33	1	2013	0	32	1	0	1	0	0	3	4	4	6.904	0.94708	0	0	0	1	1	89	20	0	0	1	0
0	79	1	2013	0	17	1	0	0	0	0	2	4	4	5.9672	0.77509	0	0	0	3	1	35	17	0	0	0	0
0	64	1	2013	0	32	1	0	0	1	0	4	4	4	7.8408	0.86686	0	0	0	1	1	87	35	0	0	0	1
0	78	1	2013	0	25	0	0	0	0	1	4	4	4	7.8408	0.91767	0	0	1	1	1	104	83	0	1	1	1
0	72	1	2013	0	26	0	0	1	0	0	4	4	4	7.8408	0.91168	0	0	1	1	1	67	9	0	1	0	0
0	60	1	2013	0	25	0	0	0	0	1	4	4	4	7.8408	0.91767	0	0	0	1	1	39	9	0	0	1	1
0	60	0	2013	0	29	0	0	0	0	1	4	4	4	7.8408	0.89128	2	0	0	1	1	130	3	0	0	1	0
0	78	1	2013	0	34	1	0	0	0	1	0	4	4	4.0936	0.13511	0	0	0	1	1	87	2	1	1	1	0
0	88	0	2013	0	35	0	0	1	0	1	4	4	4	7.8408	0.83795	1	0	0	1	1	41	11	1	1	0	1
0	29	1	2013	0	24	0	0	1	0	0	4	4	4	7.8408	0.98779	0	0	1	2	1	35	7	0	0	1	1
0	32	1	2013	0	21	0	0	1	0	0	4	4	4	7.8408	0.99028	0	0	0	3	1	61	3	0	0	0	0
0	47	0	2013	0	18	0	0	1	0	0	4	4	4	7.8408	0.99226	0	0	0	3	1	44	5	0	0	0	0
0	34	1	2013	0	21	0	0	1	0	0	4	4	4	7.8408	0.99028	0	0	0	1	1	65	6	0	0	1	0
0	39	1	2013	0	75	1	0	0	0	1	0	0	0	0	0.0009	0	0	0	3	1	16	1	1	0	1	0
0	38	1	2013	0	16	0	0	0	1	0	4	4	4	7.8408	0.99336	0	0	0	1	1	28	1	0	0	0	0
0	63	0	2013	0	18	0	0	1	0	0	4	4	4	7.8408	0.9502	0	0	0	1	1	36	3	0	0	0	0
1	58	1	2013	0	34	1	0	0	0	1	4	4	4	7.8408	0.84811	0	0	0	3	1	77	22	0	1	0	0
0	60	0	2013	0	41	0	0	1	0	1	4	2	3	6.0848	0.37903	0	0	0	1	1	77	11	0	1	0	1
0	62	1	2013	0	25	1	0	0	0	0	2	4	4	5.9672	0.65088	0	0	0	3	1	66	8	0	0	0	1
0	64	0	2013	0	48	0	0	1	1	1	4	2	4	6.3756	0.32001	0	0	1	1	1	21	36	0	1	1	1
0	79	1	2013	0	25	0	0	0	1	1	4	4	4	7.8408	0.91767	0	0	0	1	1	76	12	0	0	1	1
0	82	0	2013	0	25	1	0	0	0	1	4	4	4	7.8408	0.91767	0	0	0	3	1	50	6	0	0	0	0
0	54	1	2013	0	29	1	0	1	0	0	4	4	4	7.8408	0.98217	2	0	0	1	1	62	35	0	0	1	0
0	44	1	2013	0	16	0	0	1	0	0	4	4	4	7.8408	0.99336	0	0	0	3	1	51	11	0	0	0	0
0	34	1	2013	0	18	1	0	0	1	0	0	4	4	4.0936	0.78203	0	0	0	1	1	36	15	0	1	1	0
0	62	1	2013	0	26	1	0	0	0	0	3	4	4	6.904	0.80848	0	0	1	3	1	22	2	1	1	0	0
0	47	1	2013	0	19	0	0	1	0	1	4	4	3	7.55	0.98901	0	0	0	1	1	81	10	0	0	1	1
0	63	1	2013	0	17	1	0	0	0	0	4	4	4	7.8408	0.95371	0	0	1	2	1	69	3	0	0	0	0
0	84	1	2013	0	29	1	0	1	0	0	4	4	4	7.8408	0.89128	0	0	1	1	1	94	13	0	0	1	0
0	87	0	2013	0	41	1	0	1	1	0	4	4	4	7.8408	0.76536	0	0	0	1	1	93	18	0	0	1	0
0	48	1	2013	0	17	0	0	0	0	1	4	2	4	6.3756	0.97159	1	1	0	1	1	97	9	0	0	1	1
0	60	0	2013	0	41	0	0	1	0	1	4	4	3	7.55	0.71192	0	0	0	1	1	37	11	0	0	0	1
0	56	1	2013	0	29	1	0	1	0	0	4	4	4	7.8408	0.89128	0	0	0	1	1	37	8	0	0	1	0
0	39	1	2013	0	45	0	0	1	1	0	4	4	4	7.8408	0.9416	0	0	0	3	1	54	11	0	1	0	1
0	74	1	2013	0	54	1	0	1	0	0	2	4	4	5.9672	0.16738	0	0	0	1	1	32	2	1	1	1	0
0	55	1	2013	0	25	1	0	0	0	1	4	4	4	7.8408	0.91767	0	0	0	2	1	78	26	0	0	1	0
0	66	1	2013	0	36	1	0	1	0	0	4	4	3	7.55	0.78393	0	0	1	1	1	34	54	0	1	1	0
1	49	1	2013	0	34	0	0	1	1	1	4	4	3	7.55	0.96602	1	1	0	3	1	100	10	0	0	1	0
0	57	1	2013	0	16	1	0	0	0	0	4	4	4	7.8408	0.95699	0	0	0	2	1	77	6	0	0	1	0
0	21	1	2013	0	21	0	0	1	0	0	4	4	4	7.8408	0.99028	0	0	1	3	1	58	5	0	0	1	0
0	27	1	2013	0	24	0	0	1	0	0	4	4	4	7.8408	0.98779	0	0	1	2	1	96	20	0	0	1	0
0	23	1	2013	0	29	1	0	1	0	0	4	4	4	7.8408	0.98217	0	0	0	1	1	142	34	0	1	1	1
0	61	0	2013	0	22	0	0	1	1	0	4	4	3	7.55	0.91404	0	0	0	2	1	159	15	0	0	1	1
0	78	1	2013	0	36	0	0	1	0	1	4	3	4	7.1082	0.70414	2	0	1	1	2	88	12	0	1	1	0
0	40	1	2013	0	24	0	0	1	0	0	4	4	4	7.8408	0.98779	0	0	1	1	2	75	6	0	0	0	0
0	21	1	2013	0	21	0	0	1	0	0	4	4	4	7.8408	0.99028	0	0	0	2	2	38	4	0	0	0	0
0	81	1	2013	0	26	0	0	1	0	0	0	4	4	4.0936	0.22407	0	0	0	1	2	51	16	0	1	1	0
0	78	1	2013	0	16	0	0	1	0	0	4	4	3	7.55	0.944	0	0	0	1	2	78	3	0	0	0	0
0	73	0	2013	0	21	0	0	1	0	0	3	4	4	6.904	0.86107	0	0	0	1	2	105	7	0	1	1	0
0	52	1	2013	0	21	1	0	0	0	0	2	4	4	5.9672	0.94455	0	0	1	3	2	55	3	0	0	1	0
1	25	1	2013	1	18	1	0	0	1	0	3	3	4	6.1714	0.96305	0	1	0	1	2	50	1	0	1	1	1
0	75	1	2013	0	27	0	0	0	0	1	4	4	4	7.8408	0.90529	0	0	0	1	2	86	9	0	0	1	1
0	56	0	2013	0	21	0	0	0	1	0	4	4	4	7.8408	0.9381	0	0	0	2	2	75	7	0	0	1	1
0	21	1	2013	0	17	0	0	1	0	0	4	4	4	7.8408	0.99283	0	0	1	1	2	129	12	0	0	1	0
0	74	1	2013	0	45	1	0	1	0	0	1	4	3	4.7396	0.11059	0	0	0	1	2	50	40	0	1	1	0
0	66	1	2013	0	17	1	0	0	0	0	4	4	4	7.8408	0.95371	2	0	0	1	2	31	1	0	0	0	0
0	80	0	2013	0	16	1	0	0	0	0	4	4	4	7.8408	0.95699	0	0	1	3	2	43	1	0	0	0	0
0	29	1	2013	0	29	0	0	1	0	1	4	4	4	7.8408	0.98217	0	0	0	2	2	98	8	0	0	1	0
1	62	1	2013	0	50	1	0	1	0	1	0	1	4	1.8958	0.00558	0	0	1	1	2	32	1	1	1	1	0
0	51	1	2013	0	45	0	0	1	0	1	4	3	3	6.8174	0.85858	0	0	1	1	2	79	12	0	0	1	1
0	19	0	2013	0	27	1	0	1	0	1	4	4	3	7.55	0.97987	0	0	1	1	2	21	14	0	0	0	0
0	48	1	2013	0	17	1	0	0	0	0	4	4	4	7.8408	0.99283	0	0	1	3	2	56	4	0	0	0	0
0	76	0	2013	0	25	1	0	0	0	0	0	4	4	4.0936	0.23771	2	0	1	1	2	23	3	1	0	0	0
0	70	1	2013	0	26	1	0	0	0	0	3	4	4	6.904	0.80848	0	0	0	3	2	52	7	0	0	0	1
0	73	0	2013	0	30	1	0	0	0	0	0	4	3	3.8028	0.13862	0	0	0	3	2	75	2	1	1	1	0
0	51	1	2013	0	33	1	0	1	0	0	4	4	4	7.8408	0.97592	0	0	0	1	2	107	6	0	0	1	0
0	41	1	2013	0	18	1	0	0	0	1	4	4	4	7.8408	0.99226	2	0	0	3	2	87	4	0	0	1	0
0	51	0	2013	0	21	0	0	1	0	0	4	4	3	7.55	0.98721	0	0	0	1	2	117	4	0	0	1	1
0	59	1	2013	0	29	1	0	1	0	0	4	4	4	7.8408	0.89128	0	0	0	1	2	40	7	0	0	1	0
0	39	1	2013	0	18	0	0	1	0	0	4	4	4	7.8408	0.99226	0	0	0	3	2	64	5	0	0	0	0
0	76	1	2013	0	26	0	0	1	1	0	4	3	4	7.1082	0.83686	6	0	1	2	2	67	4	0	0	0	1
0	70	1	2013	0	29	0	0	1	0	1	4	4	4	7.8408	0.89128	0	0	1	1	2	125	5	0	0	1	0
0	71	1	2013	0	26	0	0	1	0	1	4	4	4	7.8408	0.91168	0	0	0	2	2	97	3	0	0	1	0
0	66	1	2013	0	45	1	0	1	0	0	0	4	4	4.0936	0.0629	0	0	0	1	2	29	48	0	1	1	0
0	38	1	2013	0	16	1	0	0	0	0	4	4	4	7.8408	0.99336	1	1	0	2	2	28	7	0	0	0	0
0	41	1	2013	0	75	1	0	1	0	1	4	4	3	7.55	0.54952	0	0	0	1	2	83	11	0	0	1	0
0	71	1	2013	0	17	0	0	1	0	0	4	4	4	7.8408	0.95371	0	0	1	1	2	82	64	0	0	1	1
0	93	1	2013	0	54	1	0	1	0	0	0	2	3	2.3376	0.00625	0	0	1	1	2	86	2	1	1	1	0
0	59	1	2013	0	16	1	0	0	0	0	4	4	4	7.8408	0.95699	0	0	0	2	2	102	4	0	0	1	0
0	20	0	2013	0	17	1	0	0	0	0	4	4	4	7.8408	0.99283	0	0	0	3	2	36	8	0	0	0	0
0	44	1	2013	0	24	0	0	1	0	0	4	4	4	7.8408	0.98779	0	0	0	3	2	28	6	0	0	0	0
0	24	1	2013	0	26	1	0	0	0	0	4	4	4	7.8408	0.98579	2	0	1	2	2	113	60	0	0	1	0
0	36	0	2013	0	29	1	0	1	0	0	3	4	4	6.904	0.95751	0	0	1	3	2	60	24	0	0	0	0
0	65	1	2013	0	30	1	0	0	0	0	3	4	4	6.904	0.75639	0	0	0	1	2	50	5	1	1	0	1
0	34	1	2013	0	20	0	0	1	0	0	4	4	4	7.8408	0.99099	0	0	0	1	3	100	10	0	0	1	0
0	60	1	2013	0	32	0	0	1	1	0	4	4	4	7.8408	0.86686	0	0	0	1	3	85	18	0	0	1	1
0	28	0	2013	0	17	0	0	0	1	0	4	4	4	7.8408	0.99283	0	0	0	1	3	39	11	0	0	0	0
0	76	1	2013	0	34	1	1	1	0	0	2	4	4	5.9672	0.48293	1	0	1	1	3	89	43	0	1	1	0
0	83	0	2013	0	16	1	0	0	0	0	4	4	4	7.8408	0.95699	2	0	0	2	3	36	3	0	0	0	0
0	66	1	2013	0	26	0	0	1	0	1	4	4	4	7.8408	0.91168	0	0	0	3	3	66	51	0	1	1	1
0	63	0	2013	0	20	1	0	0	0	0	4	4	4	7.8408	0.94241	0	0	0	2	3	99	3	0	0	0	0
0	68	1	2013	0	45	0	0	1	0	1	0	4	4	4.0936	0.0629	0	0	0	2	3	85	1	1	1	1	0
0	69	1	2013	0	45	1	0	1	0	0	4	4	4	7.8408	0.7058	2	0	0	2	3	82	42	0	0	1	0
0	61	1	2013	0	22	1	0	0	0	1	0	0	0	0	0.00783	0	0	1	1	3	157	1	1	0	1	0
0	77	1	2013	0	22	0	1	1	0	0	4	4	4	7.8408	0.93348	1	0	0	1	3	41	15	0	0	1	0
0	59	1	2013	0	66	1	1	1	1	1	0	1	4	1.8958	0.00164	0	0	0	2	3	112	58	0	0	1	1
0	57	0	2013	0	25	1	0	0	0	0	2	4	4	5.9672	0.65088	0	0	1	3	3	31	7	0	0	0	1
0	59	1	2013	0	26	1	0	0	0	0	4	4	4	7.8408	0.91168	2	0	0	2	3	43	3	0	0	0	0
0	54	1	2013	0	26	1	0	1	0	0	4	4	4	7.8408	0.98579	2	0	0	3	3	61	31	0	0	1	0
1	19	0	2013	0	54	0	0	1	0	1	3	3	3	5.8806	0.55435	0	1	0	2	3	30	18	0	1	0	1
0	75	0	2013	0	17	1	0	0	0	0	4	4	4	7.8408	0.95371	0	0	0	1	3	75	13	0	0	1	0
0	81	0	2013	0	18	1	0	0	0	0	4	4	4	7.8408	0.9502	0	0	0	2	3	75	6	0	0	0	0
0	28	1	2013	0	35	1	0	1	0	0	2	4	3	5.6764	0.81496	0	0	0	2	3	39	38	0	1	1	0
0	62	1	2013	0	36	1	0	1	0	0	4	4	4	7.8408	0.82725	0	0	0	3	3	59	14	0	0	0	0
0	73	1	2013	0	25	1	0	0	0	0	4	4	4	7.8408	0.91767	0	0	1	1	3	79	12	0	0	1	0
0	76	0	2013	0	26	1	0	0	0	0	1	4	4	5.0304	0.41387	0	0	1	1	3	51	3	1	1	1	0
0	84	0	2013	0	17	0	0	1	0	0	4	4	4	7.8408	0.95371	0	0	1	2	3	49	5	0	0	0	0
0	73	1	2013	0	50	1	0	1	1	1	0	3	4	3.361	0.02222	3	0	0	2	3	67	6	1	1	0	1
0	51	1	2013	0	19	0	0	1	0	0	3	4	4	6.904	0.97983	2	1	0	2	3	87	15	1	1	1	0
1	33	1	2013	0	43	1	0	1	0	1	0	4	0	2.9304	0.14771	3	0	0	1	3	46	2	1	1	0	0
0	28	1	2013	0	33	0	0	1	0	0	3	4	4	6.904	0.9431	0	0	1	1	3	39	15	0	0	0	0
0	79	0	2013	0	50	1	0	1	0	1	0	2	4	2.6284	0.01117	0	0	0	1	3	80	1	1	1	1	0
0	42	1	2013	0	21	0	0	1	0	0	4	4	4	7.8408	0.99028	0	0	0	1	3	69	5	0	0	1	0
0	61	1	2013	0	34	1	0	1	1	0	4	4	4	7.8408	0.84811	0	0	0	2	3	83	12	0	0	1	1
0	82	1	2013	0	16	1	0	0	0	0	4	4	4	7.8408	0.95699	6	0	0	1	3	33	24	0	0	0	0
0	65	1	2013	0	16	1	0	0	0	0	4	4	4	7.8408	0.95699	1	0	0	1	3	67	9	0	0	1	0
0	29	0	2013	0	22	1	0	1	0	0	4	4	4	7.8408	0.98951	1	0	0	3	3	83	20	0	0	0	0
0	63	1	2013	0	33	1	0	0	0	0	0	4	4	4.0936	0.14434	3	0	1	1	3	116	2	1	1	1	0
0	84	0	2013	0	16	1	0	0	0	0	3	4	4	6.904	0.90098	0	0	0	3	4	44	1	0	0	0	0
0	62	1	2013	0	16	0	0	0	0	1	4	4	4	7.8408	0.95699	1	0	0	2	4	81	9	0	1	1	1
0	66	1	2013	0	33	0	0	1	0	0	4	4	4	7.8408	0.85774	3	0	0	1	4	108	16	0	1	1	0
0	38	1	2013	0	16	0	0	0	1	0	4	4	4	7.8408	0.99336	0	0	1	2	4	34	3	0	0	0	1
0	25	1	2013	0	26	0	0	0	1	1	2	3	4	5.2346	0.85222	0	0	0	3	4	28	14	0	1	0	1
0	60	1	2013	0	16	1	0	0	0	0	4	4	4	7.8408	0.95699	0	0	0	1	4	64	8	0	0	1	0
0	76	1	2013	0	17	0	0	1	0	0	4	3	4	7.1082	0.91103	0	0	0	1	4	20	17	0	0	0	0
0	88	1	2013	0	27	1	0	0	0	0	4	4	4	7.8408	0.90529	0	0	0	1	4	66	1	0	0	0	0
0	81	1	2013	0	16	0	0	1	0	0	4	4	4	7.8408	0.95699	0	0	0	2	4	100	15	0	1	0	0
0	58	1	2013	0	25	0	0	0	1	1	4	4	4	7.8408	0.91767	0	0	0	1	4	115	3	0	0	1	1
0	87	1	2013	0	26	1	0	0	0	0	4	4	4	7.8408	0.91168	2	0	0	1	4	28	19	0	0	0	0
0	65	1	2013	0	29	1	0	1	0	0	3	4	4	6.904	0.77026	0	0	0	3	4	27	10	0	0	0	0
0	70	0	2013	0	45	1	0	1	0	0	2	4	4	5.9672	0.28636	0	0	0	2	4	59	42	0	1	0	0
0	75	1	2013	0	57	1	0	1	1	0	4	4	4	7.8408	0.48837	0	0	0	1	4	79	9	0	1	1	1
0	64	1	2013	0	38	1	0	0	1	0	4	4	4	7.8408	0.80419	0	0	0	1	4	74	17	0	0	0	1
1	58	1	2013	1	25	0	0	1	0	1	4	4	4	7.8408	0.91767	1	0	1	2	4	89	12	0	0	1	0
0	44	1	2013	0	75	1	0	0	0	0	0	0	0	0	0.0009	0	0	1	1	4	120	1	1	0	1	0
0	84	0	2013	0	20	1	0	0	0	0	4	4	4	7.8408	0.94241	0	0	1	3	4	42	11	0	0	0	0
0	84	0	2014	0	26	0	0	0	1	1	4	4	4	7.8408	0.91168	0	0	0	2	4	64	12	0	0	0	1
0	60	1	2014	0	24	1	0	0	0	0	4	4	4	7.8408	0.92329	2	0	0	2	4	49	9	0	0	0	0
0	64	1	2014	0	26	0	0	1	0	0	4	4	4	7.8408	0.91168	0	0	0	3	4	101	3	0	0	1	0
0	66	1	2014	0	34	0	0	0	1	1	4	4	4	7.8408	0.84811	6	0	0	1	4	87	13	0	0	1	1
0	50	1	2014	0	24	0	0	1	0	0	4	4	4	7.8408	0.98779	0	0	0	3	4	51	9	0	0	0	0
0	76	1	2014	0	25	1	0	0	0	0	3	4	4	6.904	0.82009	0	1	0	3	4	53	13	0	0	0	0
1	25	1	2014	0	50	0	0	1	0	0	3	4	4	6.904	0.8179	0	0	0	1	4	94	78	1	1	1	0
0	79	0	2014	0	25	1	0	0	0	1	4	4	4	7.8408	0.91767	0	0	1	2	4	81	6	0	0	0	0
0	91	1	2014	0	26	1	0	0	0	0	0	2	4	2.6284	0.06658	0	0	0	3	4	29	2	1	0	0	0
0	92	0	2014	0	17	0	0	1	0	0	3	4	3	6.6132	0.86458	0	1	0	1	4	61	11	0	0	0	0
0	30	1	2014	0	17	1	0	0	0	0	4	4	4	7.8408	0.99283	0	0	1	3	4	117	4	0	0	0	0
0	77	1	2014	0	50	1	0	1	1	0	4	4	4	7.8408	0.62036	0	0	0	1	4	58	24	0	1	0	1
0	76	1	2014	0	29	0	0	1	1	0	4	3	4	7.1082	0.80292	1	0	0	1	4	45	53	0	1	0	1
0	34	1	2014	0	25	0	0	1	0	0	4	4	4	7.8408	0.98683	0	0	0	1	4	31	9	0	0	0	0
0	52	0	2014	0	18	1	0	0	0	0	4	4	4	7.8408	0.99226	0	0	0	2	4	42	3	0	0	0	0
0	52	0	2014	0	17	0	0	1	0	0	4	4	4	7.8408	0.99283	0	0	0	2	4	84	14	0	0	0	0
0	70	0	2014	0	45	1	0	1	0	0	0	4	3	3.8028	0.04839	0	0	0	2	4	60	81	0	1	1	0
0	57	1	2014	0	26	0	0	1	1	0	4	4	4	7.8408	0.91168	0	0	0	1	4	71	5	0	0	1	0
0	61	1	2014	0	17	1	0	0	0	0	4	4	4	7.8408	0.95371	0	0	0	1	4	46	1	0	0	0	0
0	29	0	2014	0	19	1	1	0	0	0	4	4	4	7.8408	0.99165	0	0	0	2	4	61	4	0	0	0	0
0	82	0	2014	0	18	0	0	1	0	1	4	4	4	7.8408	0.9502	0	0	1	1	4	86	5	0	1	1	0
0	49	1	2014	0	18	0	0	1	0	0	4	4	4	7.8408	0.99226	0	0	0	1	4	21	1	0	0	0	0
0	59	1	2014	0	16	1	0	0	0	0	4	4	4	7.8408	0.95699	0	0	0	1	1	115	1	0	0	0	0
0	61	1	2014	0	21	0	0	1	0	0	4	4	4	7.8408	0.9381	0	0	0	3	1	44	5	0	0	0	0
0	82	0	2014	0	17	1	0	0	0	0	4	4	4	7.8408	0.95371	0	0	0	1	1	54	3	0	0	0	0
0	51	1	2014	0	16	0	0	1	0	0	0	0	0	0	0.07757	0	0	1	3	1	142	1	1	0	1	0
0	51	0	2014	0	34	1	0	1	1	0	4	4	4	7.8408	0.97404	0	0	0	3	1	51	12	0	0	0	0
0	73	1	2014	0	21	0	0	1	0	0	4	4	4	7.8408	0.9381	0	0	1	3	1	87	5	0	0	1	0
0	83	0	2014	0	41	1	1	1	0	0	3	4	4	6.904	0.57155	0	0	0	2	1	63	36	0	1	0	1
0	43	0	2014	0	17	0	0	1	0	0	2	4	4	5.9672	0.95861	0	0	1	1	1	82	7	0	0	1	0
0	69	0	2014	0	27	1	0	0	0	0	4	4	4	7.8408	0.90529	1	0	0	1	1	47	1	0	0	0	0
1	73	0	2014	0	27	0	0	0	0	0	4	4	3	7.55	0.87867	1	0	0	3	1	73	2	1	1	0	0
0	79	0	2014	0	16	1	0	0	0	0	4	4	4	7.8408	0.95699	6	0	0	1	1	36	1	0	0	0	0
0	73	0	2014	0	17	0	0	1	0	0	4	4	4	7.8408	0.95371	0	0	0	1	1	65	12	0	0	1	0
0	32	1	2014	0	29	1	0	1	0	0	4	4	4	7.8408	0.98217	1	0	0	2	1	82	6	0	0	1	0
0	29	1	2014	1	16	0	0	1	0	0	4	4	4	7.8408	0.99336	0	0	0	1	1	40	3	0	0	1	0
0	65	1	2014	0	18	1	0	0	0	0	4	4	4	7.8408	0.9502	0	0	0	1	1	43	7	0	0	0	0
0	69	1	2014	0	18	1	0	0	0	0	4	4	4	7.8408	0.9502	2	0	0	1	1	37	3	0	0	0	0
0	68	1	2014	0	17	0	0	0	0	1	4	4	4	7.8408	0.95371	5	1	1	1	1	55	12	0	0	1	0
0	59	1	2014	0	26	1	0	1	0	0	3	4	4	6.904	0.80848	0	0	1	1	1	54	9	0	0	1	0
0	84	1	2014	0	20	0	0	1	0	0	4	4	4	7.8408	0.94241	1	0	0	1	1	131	35	0	1	1	0
0	25	1	2014	0	17	0	0	1	0	0	4	4	4	7.8408	0.99283	0	0	0	3	1	54	3	0	0	0	0
0	46	1	2014	0	24	0	0	1	0	0	3	4	3	6.6132	0.96163	0	0	0	1	1	81	3	0	0	1	0
0	70	1	2014	0	25	1	0	0	0	0	4	4	4	7.8408	0.91767	0	0	1	2	1	64	7	0	0	0	0
0	53	1	2014	0	29	1	0	1	0	0	2	4	4	5.9672	0.90211	0	0	1	2	1	71	8	0	1	0	0
0	57	0	2014	0	20	0	0	1	0	0	4	4	3	7.55	0.92536	0	0	0	1	1	96	8	0	0	0	0
0	20	1	2014	0	29	0	0	1	0	1	4	4	4	7.8408	0.98217	0	0	0	2	1	61	5	0	0	0	0
0	72	1	2014	0	26	1	0	1	0	0	4	4	4	7.8408	0.91168	0	0	1	1	1	43	13	0	0	1	0
0	38	1	2014	0	21	0	0	1	0	0	4	4	4	7.8408	0.99028	0	0	0	3	1	83	15	0	0	0	0
0	87	0	2014	0	25	0	0	0	0	0	4	4	4	7.8408	0.91767	0	0	0	2	1	74	38	1	0	0	0
0	71	1	2014	0	20	1	0	0	0	0	3	4	4	6.904	0.87	0	0	1	3	1	24	42	0	1	0	0
0	86	1	2014	0	25	0	0	0	0	0	3	2	3	5.148	0.46035	0	0	1	2	1	72	2	1	0	1	0
0	64	1	2014	0	33	1	0	0	0	0	2	4	4	5.9672	0.50212	3	0	0	1	1	107	8	1	1	1	0
0	53	1	2014	0	18	0	0	1	0	0	4	4	4	7.8408	0.99226	0	0	0	2	1	57	3	0	0	0	0
0	94	1	2014	0	16	1	0	0	0	0	4	4	4	7.8408	0.95699	1	0	0	3	1	65	1	0	0	0	0
0	53	1	2014	0	20	0	0	0	0	1	4	4	4	7.8408	0.99099	0	0	1	1	2	90	8	0	0	1	1
0	59	1	2014	0	21	0	0	1	0	0	4	4	4	7.8408	0.9381	2	0	0	2	2	84	6	0	0	1	0
0	74	1	2014	0	20	1	0	0	0	0	4	4	4	7.8408	0.94241	0	0	0	1	2	45	6	0	0	0	0
0	47	1	2014	0	22	1	0	0	0	1	4	4	4	7.8408	0.98951	0	0	0	1	2	65	8	0	0	1	0
0	67	1	2014	0	21	0	0	1	0	0	4	4	4	7.8408	0.9381	0	0	1	1	2	99	5	0	0	1	0
0	43	1	2014	0	21	1	0	0	0	0	2	4	4	5.9672	0.94455	0	0	1	3	2	36	6	0	1	0	0
0	70	1	2014	0	22	0	1	1	0	0	4	4	4	7.8408	0.93348	3	1	0	2	2	66	27	0	0	1	0
0	77	1	2014	0	45	1	0	1	0	0	2	4	4	5.9672	0.28636	0	0	0	1	2	59	36	0	1	1	0
0	87	1	2014	0	25	1	0	0	0	0	0	4	4	4.0936	0.23771	0	0	1	2	2	29	2	1	1	0	0
0	25	1	2014	0	16	1	0	0	0	0	3	4	4	6.904	0.98391	0	0	0	2	2	29	9	0	1	0	0
0	37	1	2014	0	26	0	0	1	1	0	4	4	4	7.8408	0.98579	0	0	0	1	2	49	11	0	0	1	0
0	58	1	2014	0	19	1	0	1	0	0	4	4	4	7.8408	0.94644	1	1	1	1	2	39	15	0	0	1	0
0	58	1	2014	0	50	1	0	1	1	1	4	4	4	7.8408	0.62036	0	0	1	2	2	87	23	0	1	1	1
0	20	1	2014	0	21	0	0	0	1	0	4	4	4	7.8408	0.99028	0	0	0	3	2	94	3	0	0	0	0
0	74	0	2014	0	17	1	0	0	0	0	4	4	4	7.8408	0.95371	0	0	0	1	2	38	8	0	0	0	0
0	67	1	2014	0	38	1	0	1	0	0	3	4	3	6.6132	0.55997	1	0	0	1	2	39	27	0	1	0	0
0	16	1	2014	0	59	1	0	1	1	0	2	3	4	5.2346	0.31382	0	0	1	3	2	50	11	1	1	1	1
0	47	1	2014	0	24	0	0	1	0	0	4	4	4	7.8408	0.98779	0	0	0	2	2	72	4	0	0	0	0
0	20	1	2014	0	24	0	0	1	0	0	4	4	4	7.8408	0.98779	0	0	0	1	2	105	5	0	0	1	0
0	27	1	2014	0	18	0	0	0	1	1	4	4	4	7.8408	0.99226	0	0	0	1	2	65	8	0	0	1	1
0	65	0	2014	0	16	1	0	0	0	0	3	4	4	6.904	0.90098	3	1	0	2	2	115	5	0	0	0	0
0	63	1	2014	0	34	0	0	1	1	1	4	4	4	7.8408	0.84811	0	0	0	1	2	87	16	0	0	1	1
0	29	0	2014	0	16	0	0	1	0	0	4	4	4	7.8408	0.99336	0	0	0	2	2	39	4	0	0	0	0
0	67	0	2014	0	26	0	0	1	0	1	4	4	4	7.8408	0.91168	0	0	1	2	2	94	4	0	0	0	0
0	73	0	2014	0	41	1	0	1	0	1	2	4	4	5.9672	0.35299	0	0	1	1	2	86	34	0	1	1	0
0	63	0	2014	0	18	0	0	1	0	0	4	4	4	7.8408	0.9502	0	0	0	1	2	73	6	0	0	1	0
0	60	1	2014	0	17	0	0	0	0	1	4	4	4	7.8408	0.95371	0	0	1	1	2	75	8	0	0	1	1
0	37	1	2014	0	29	1	0	1	0	0	4	4	4	7.8408	0.98217	0	0	1	2	2	36	10	0	0	1	0
0	63	0	2014	0	36	1	0	1	0	0	4	4	4	7.8408	0.82725	0	0	0	1	2	28	12	0	0	0	0
0	44	1	2014	0	24	0	0	1	0	0	4	4	4	7.8408	0.98779	0	0	0	1	2	114	16	0	0	1	0
0	68	1	2014	0	42	0	0	1	0	1	4	4	4	7.8408	0.75128	0	0	0	3	2	48	11	0	0	0	0
0	76	0	2014	0	21	0	0	1	0	0	4	4	4	7.8408	0.9381	2	0	0	2	2	59	12	0	0	1	0
0	19	1	2014	0	27	1	0	1	0	1	4	4	4	7.8408	0.98467	0	0	0	1	2	99	10	0	0	1	0
1	43	1	2014	0	41	1	0	1	0	0	2	4	3	5.6764	0.73532	0	0	0	3	2	26	48	0	1	0	0
0	85	0	2014	0	34	0	0	1	0	1	3	4	4	6.904	0.69546	0	0	0	2	3	230	1	1	1	1	1
0	63	1	2014	0	26	0	0	1	0	0	4	4	4	7.8408	0.91168	0	0	0	2	3	77	13	0	1	0	0
1	46	1	2014	0	29	0	0	1	0	0	4	4	4	7.8408	0.98217	0	0	0	1	3	91	12	0	1	1	0
0	73	1	2014	0	25	1	0	1	0	0	4	4	4	7.8408	0.91767	0	0	0	1	3	101	3	0	0	1	0
0	40	1	2014	0	50	0	0	1	1	1	4	2	3	6.0848	0.67268	0	0	0	1	3	95	52	0	1	1	1
0	26	0	2014	0	35	0	0	1	1	0	4	4	4	7.8408	0.97203	0	0	0	3	3	31	2	1	1	0	1
0	47	1	2014	0	45	1	0	1	0	0	4	4	4	7.8408	0.9416	0	0	1	3	3	65	56	0	0	1	0
0	56	1	2014	0	22	0	0	1	0	1	4	4	4	7.8408	0.93348	0	0	0	1	3	96	4	0	0	1	0
0	60	1	2014	0	25	0	0	0	0	0	4	4	4	7.8408	0.91767	0	0	0	1	3	53	28	0	0	1	0
0	29	1	2014	0	19	1	0	1	0	0	4	4	4	7.8408	0.99165	0	0	0	1	3	80	9	0	0	0	0
0	78	1	2014	0	24	1	0	0	0	0	4	4	4	7.8408	0.92329	0	0	0	3	3	54	11	0	0	1	0
0	20	1	2014	0	35	1	0	1	0	0	2	4	4	5.9672	0.85322	0	0	1	3	3	26	20	0	1	0	0
0	79	0	2014	0	26	1	0	0	0	0	4	4	4	7.8408	0.91168	0	0	0	1	3	35	6	0	0	0	0
0	65	1	2014	0	29	0	0	1	0	1	4	4	4	7.8408	0.89128	0	0	0	3	3	102	16	0	0	1	0
1	51	1	2014	0	25	0	0	0	0	0	4	4	3	7.55	0.98269	0	0	0	3	3	77	2	1	1	1	0
0	43	1	2014	0	16	1	0	0	0	0	4	4	4	7.8408	0.99336	0	0	1	2	3	59	7	0	0	0	0
0	43	0	2014	0	27	0	0	1	1	1	4	4	4	7.8408	0.98467	0	0	1	2	3	49	14	0	0	0	1
0	47	1	2014	0	25	0	0	0	0	1	4	4	4	7.8408	0.98683	0	0	0	1	3	59	17	0	0	0	1
0	64	1	2014	0	17	0	0	1	0	0	4	4	4	7.8408	0.95371	1	0	0	1	3	98	9	0	0	1	1
0	75	0	2014	0	17	1	0	0	0	0	4	4	4	7.8408	0.95371	0	0	0	2	3	76	9	0	0	0	0
0	47	1	2014	0	27	1	0	1	0	1	4	4	4	7.8408	0.98467	0	0	0	2	3	16	10	0	0	0	0
0	62	1	2014	0	33	1	0	1	0	0	4	4	4	7.8408	0.85774	0	0	1	1	3	71	7	0	0	1	0
0	78	0	2014	0	35	0	0	1	0	1	4	4	4	7.8408	0.83795	0	0	1	3	3	41	9	0	0	0	0
0	77	1	2014	0	20	1	0	0	0	0	3	4	4	6.904	0.87	1	0	0	1	3	72	7	0	0	0	0
0	69	1	2014	0	34	1	0	1	1	1	4	4	4	7.8408	0.84811	1	0	0	2	3	51	37	0	1	1	0
0	85	1	2014	0	17	1	0	0	0	0	4	4	4	7.8408	0.95371	0	0	0	1	3	55	1	0	0	0	0
0	78	1	2014	0	24	1	0	0	0	0	4	4	4	7.8408	0.92329	0	0	0	3	3	42	1	0	0	0	0
0	18	0	2014	0	22	1	0	0	0	1	4	4	4	7.8408	0.98951	0	0	0	2	3	82	9	0	0	1	0
0	91	1	2014	0	18	1	0	0	0	0	3	4	2	6.3224	0.8175	0	0	0	2	3	22	37	0	1	0	0
0	79	1	2014	0	26	1	0	0	0	0	1	4	4	5.0304	0.41387	1	0	0	3	3	50	2	1	0	0	0
0	78	0	2014	0	29	1	0	1	0	0	4	4	4	7.8408	0.89128	1	0	0	1	3	65	43	0	0	1	0
0	30	1	2014	0	24	0	0	1	0	0	4	4	4	7.8408	0.98779	0	0	0	3	3	48	6	0	0	1	0
0	60	1	2014	0	17	0	0	1	0	0	3	4	3	6.6132	0.86458	0	0	0	1	3	118	49	0	1	1	0
0	41	1	2014	0	24	0	0	1	0	0	4	4	4	7.8408	0.98779	0	0	0	2	3	61	17	0	0	0	0
0	61	0	2014	0	43	1	0	1	1	0	3	4	3	6.6132	0.46432	0	0	0	2	3	56	67	0	1	1	1
0	39	1	2014	0	21	0	0	1	0	0	4	4	4	7.8408	0.99028	0	0	0	1	3	38	5	0	0	0	0
0	50	1	2014	0	16	0	0	0	0	1	4	4	4	7.8408	0.99336	0	0	0	1	3	101	11	0	0	1	1
0	62	1	2014	0	22	1	0	1	0	0	4	4	4	7.8408	0.93348	0	0	0	1	3	68	13	0	0	1	0
0	49	0	2014	0	18	0	0	1	0	0	4	4	4	7.8408	0.99226	0	0	0	1	3	36	1	0	0	0	0
0	86	0	2014	0	21	0	0	1	0	0	4	4	4	7.8408	0.9381	0	0	0	1	3	79	25	0	0	1	0
0	75	0	2014	0	22	0	0	1	0	1	4	4	4	7.8408	0.93348	0	0	0	1	3	73	10	0	0	0	0
0	64	1	2014	0	34	0	0	1	1	1	4	4	4	7.8408	0.84811	0	0	1	1	3	78	14	0	0	1	1
0	56	1	2014	0	17	1	0	0	0	0	4	4	4	7.8408	0.95371	0	0	0	3	3	72	12	0	0	1	0
0	24	0	2014	0	21	1	0	0	0	0	4	3	4	7.1082	0.98063	0	0	0	3	4	46	28	0	0	1	0
0	58	1	2014	0	17	1	0	0	0	0	4	4	4	7.8408	0.95371	0	0	0	2	4	112	8	0	0	0	0
0	67	1	2014	0	20	0	0	0	1	0	4	4	4	7.8408	0.94241	0	0	0	1	4	83	4	0	0	1	0
0	74	1	2014	0	25	0	0	1	0	0	4	4	4	7.8408	0.91767	0	0	0	1	4	54	38	0	1	1	0
0	65	0	2014	0	16	0	0	1	0	0	4	4	4	7.8408	0.95699	4	0	0	3	4	58	11	0	0	0	0
0	62	0	2014	0	17	1	0	0	0	0	4	4	4	7.8408	0.95371	0	0	0	1	4	49	8	0	0	0	0
0	76	1	2014	0	21	0	0	1	0	0	4	4	4	7.8408	0.9381	3	0	0	1	4	77	5	0	0	1	0
0	69	1	2014	0	17	0	0	0	0	1	4	4	4	7.8408	0.95371	3	0	0	2	4	88	4	0	0	0	0
0	88	0	2014	0	26	1	0	0	0	0	3	4	3	6.6132	0.76181	0	0	0	2	4	78	3	1	0	1	0
0	28	1	2015	0	34	1	0	1	0	1	4	4	4	7.8408	0.97404	0	0	0	2	4	75	16	0	0	1	0
1	40	0	2015	0	18	0	0	1	0	0	2	4	4	5.9672	0.95546	0	1	0	3	4	101	11	0	0	0	0
0	88	0	2015	0	33	1	0	1	0	0	4	4	4	7.8408	0.85774	0	0	0	2	4	101	28	0	0	1	0
0	80	1	2015	0	22	1	0	1	0	0	4	4	4	7.8408	0.93348	0	0	0	1	4	38	18	0	0	0	0
0	23	0	2015	0	26	1	0	1	0	0	4	4	4	7.8408	0.98579	0	0	0	3	4	69	4	0	0	0	0
0	77	1	2015	0	36	1	0	1	0	0	4	4	3	7.55	0.78393	4	0	0	1	4	127	24	0	0	1	0
0	70	1	2015	0	26	1	0	0	0	1	4	4	3	7.55	0.88663	0	0	1	2	4	45	42	0	0	0	1
0	77	1	2015	0	26	1	0	1	0	0	4	4	4	7.8408	0.91168	1	0	0	3	4	48	16	0	0	0	0
0	33	1	2015	0	21	0	0	1	0	0	4	4	4	7.8408	0.99028	0	0	0	3	4	99	6	0	0	0	0
1	35	1	2015	0	22	0	0	1	0	1	4	4	4	7.8408	0.98951	1	1	0	2	4	61	17	0	0	0	0
0	55	0	2015	0	41	0	0	1	1	0	4	4	3	7.55	0.71192	0	0	0	1	4	78	19	0	0	1	0
0	86	0	2015	0	25	0	0	0	0	0	4	3	4	7.1082	0.84708	0	0	1	2	4	106	2	1	0	1	0
0	73	0	2015	0	20	1	0	0	0	0	4	4	4	7.8408	0.94241	0	0	0	3	4	37	1	0	0	0	0
0	60	1	2015	0	16	1	0	0	0	0	4	4	4	7.8408	0.95699	0	0	0	1	4	123	1	0	0	0	0
0	60	1	2015	0	26	0	0	1	0	0	4	4	4	7.8408	0.91168	0	0	0	1	4	75	10	0	1	0	0
0	48	1	2015	0	34	0	0	1	0	0	4	4	4	7.8408	0.97404	3	0	0	2	4	63	4	1	1	1	0
1	25	0	2015	0	36	1	0	1	0	0	4	4	4	7.8408	0.96987	0	1	0	2	4	28	24	0	1	0	1
0	59	1	2015	0	17	1	0	0	0	0	4	4	4	7.8408	0.95371	0	0	1	2	4	80	6	0	0	0	0
0	64	1	2015	0	18	1	1	0	0	0	3	3	4	6.1714	0.79501	0	0	1	2	4	87	6	0	0	1	0
0	37	1	2015	0	29	0	0	1	0	1	4	4	4	7.8408	0.98217	1	0	0	3	4	32	7	0	0	0	0
0	53	1	2015	0	25	1	0	0	0	0	4	4	4	7.8408	0.98683	0	0	0	1	4	102	8	0	0	1	0
0	55	1	2015	0	50	1	0	1	0	1	0	2	4	2.6284	0.01117	0	0	1	1	4	77	15	1	1	1	1
0	80	0	2015	0	41	1	0	1	0	1	4	4	4	7.8408	0.76536	0	0	1	2	1	35	112	0	0	0	0
0	79	1	2015	0	29	1	0	1	0	0	4	4	4	7.8408	0.89128	0	0	0	2	1	125	16	0	0	0	0
0	64	1	2015	0	29	0	0	1	1	0	4	4	3	7.55	0.86132	0	0	0	2	1	107	24	0	1	1	1
0	34	1	2015	0	50	0	0	1	1	1	3	4	3	6.6132	0.77288	0	0	1	3	1	85	19	0	1	1	1
0	78	1	2015	0	34	0	0	1	0	0	4	4	4	7.8408	0.84811	0	0	0	1	1	41	3	1	1	1	0
0	29	0	2015	0	21	0	0	1	0	0	4	4	4	7.8408	0.99028	0	0	0	2	1	119	5	0	0	0	0
0	78	1	2015	0	17	1	0	0	0	0	4	4	4	7.8408	0.95371	2	0	0	3	1	49	8	0	0	0	0
0	34	1	2015	0	18	0	0	1	1	0	4	4	3	7.55	0.98981	0	0	0	3	1	98	17	0	0	1	1
0	58	1	2015	0	17	0	0	0	1	0	4	4	3	7.55	0.9398	0	0	0	1	1	51	17	0	0	1	1
0	66	0	2015	0	25	1	0	0	0	0	0	4	3	3.8028	0.19111	3	1	1	1	1	71	3	1	1	0	0
0	73	1	2015	0	41	1	1	1	0	0	3	2	4	5.4388	0.24783	0	0	1	3	1	48	66	0	0	0	0
0	25	1	2015	0	22	0	0	1	1	0	4	4	3	7.55	0.9862	0	0	1	1	1	61	12	0	0	1	0
0	28	1	2015	0	26	0	0	1	0	1	4	4	4	7.8408	0.98579	0	0	1	1	1	59	11	0	0	1	0
0	61	1	2015	0	36	1	0	1	0	0	4	4	4	7.8408	0.82725	0	0	0	1	1	71	23	0	0	0	0
1	41	1	2015	0	21	0	0	1	0	0	4	4	4	7.8408	0.99028	0	1	0	3	1	69	4	0	0	0	0
0	78	0	2015	0	50	1	0	1	1	1	4	2	3	6.0848	0.23418	0	0	1	1	1	31	7	1	0	1	1
0	83	0	2015	0	21	0	0	1	0	0	4	4	4	7.8408	0.9381	0	0	1	3	1	30	22	0	0	0	0
0	19	1	2015	0	19	0	0	1	0	1	4	4	4	7.8408	0.99165	0	0	1	2	1	32	8	0	0	0	0
0	20	1	2015	0	18	1	0	0	0	0	4	4	4	7.8408	0.99226	0	0	0	2	1	47	3	0	0	0	0
0	86	1	2015	0	26	1	0	0	0	0	2	4	4	5.9672	0.63323	0	0	0	1	1	104	23	0	0	1	0
0	48	1	2015	0	22	0	0	1	1	0	4	4	4	7.8408	0.98951	0	0	0	1	1	39	17	0	0	0	1
0	58	1	2015	0	33	0	0	1	0	0	4	4	3	7.55	0.82041	0	0	0	1	1	102	19	0	0	0	0
0	41	1	2015	0	17	0	0	1	0	0	4	4	4	7.8408	0.99283	0	0	0	1	1	98	9	0	0	1	0
0	63	1	2015	0	26	1	0	0	0	0	1	3	4	4.2978	0.25977	0	0	1	2	1	31	113	0	1	0	0
0	87	1	2015	0	29	1	0	0	0	0	3	4	4	6.904	0.77026	0	0	0	2	1	33	3	1	1	0	0
0	85	1	2015	0	25	1	0	0	0	1	4	4	3	7.55	0.89412	0	0	0	2	1	101	4	0	0	1	0
0	20	1	2015	0	32	0	0	1	1	0	4	4	3	7.55	0.97072	0	0	0	3	1	47	3	0	0	0	0
0	27	0	2015	0	22	1	0	0	1	0	4	4	4	7.8408	0.98951	0	0	0	2	1	107	11	0	1	0	1
0	61	1	2015	0	34	0	0	1	1	1	3	2	3	5.148	0.2994	0	0	0	3	1	67	24	0	1	1	1
0	63	0	2015	0	27	0	0	1	0	0	4	4	4	7.8408	0.90529	2	0	1	2	1	68	24	0	1	1	0
0	37	0	2015	0	38	0	0	0	1	1	4	3	4	7.1082	0.93205	0	0	1	3	1	82	29	0	1	1	1
0	82	1	2015	0	50	0	0	1	1	1	4	2	4	6.3756	0.28755	0	0	1	1	1	66	2	1	1	1	0
0	59	0	2015	0	19	0	0	1	1	0	4	4	4	7.8408	0.94644	0	0	1	1	1	22	13	0	0	0	1
0	61	1	2015	0	30	1	0	0	0	0	2	4	4	5.9672	0.55944	0	0	1	3	1	44	63	0	1	0	0
0	52	1	2015	0	34	0	0	1	1	1	4	4	4	7.8408	0.97404	0	0	1	1	1	83	12	0	0	1	1
0	83	1	2015	1	17	0	0	1	0	0	4	4	4	7.8408	0.95371	0	0	1	2	1	46	12	0	0	0	0
0	64	1	2015	0	21	0	0	1	0	0	4	4	4	7.8408	0.9381	0	0	0	1	1	40	1	0	0	0	0
0	37	1	2015	0	17	0	0	1	0	0	4	4	4	7.8408	0.99283	0	0	0	3	1	61	4	0	0	0	0
0	90	1	2015	0	42	1	0	1	0	0	4	4	4	7.8408	0.75128	0	0	1	1	1	45	11	0	0	0	0
0	59	1	2015	0	45	0	0	1	0	1	4	3	4	7.1082	0.54385	0	0	0	1	2	71	24	0	0	1	0
0	73	1	2015	0	66	1	0	1	0	1	4	4	4	7.8408	0.3235	0	0	0	3	2	77	29	0	0	1	0
0	51	1	2015	0	26	0	0	1	0	1	4	4	3	7.55	0.98133	0	0	0	3	2	135	4	0	0	1	0
0	39	1	2015	0	34	1	0	1	0	1	4	4	3	7.55	0.96602	0	0	0	1	2	99	8	0	0	1	0
0	69	0	2015	0	29	1	0	1	0	0	4	4	4	7.8408	0.89128	0	0	1	1	2	64	7	0	0	0	0
0	86	0	2015	0	33	1	0	1	0	0	4	4	4	7.8408	0.85774	0	0	1	1	2	93	17	0	0	1	0
0	37	1	2015	0	26	0	0	1	1	0	4	4	3	7.55	0.98133	1	0	0	1	2	22	30	0	1	0	0
0	71	1	2015	0	21	0	0	1	0	0	4	4	4	7.8408	0.9381	0	0	0	1	2	49	4	0	0	1	0
0	75	1	2015	0	45	1	0	1	0	0	4	4	4	7.8408	0.7058	0	0	0	1	2	51	2	1	1	0	0
0	60	0	2015	0	19	1	0	0	0	1	4	4	4	7.8408	0.94644	0	0	1	1	2	104	36	0	1	1	0
1	38	0	2015	0	57	1	0	1	0	1	2	4	4	5.9672	0.51762	0	1	0	2	2	41	31	0	1	0	1
0	77	1	2015	0	17	1	0	0	0	0	4	4	4	7.8408	0.95371	0	0	0	1	2	47	10	0	0	0	0
0	73	0	2015	0	16	1	0	0	0	0	4	4	4	7.8408	0.95699	0	0	1	1	2	24	1	0	0	0	0
0	74	0	2015	0	17	1	0	0	0	0	4	4	4	7.8408	0.95371	1	0	0	1	2	33	4	0	0	0	0
0	44	1	2015	0	41	1	1	1	0	0	4	4	4	7.8408	0.95637	0	0	0	3	2	82	11	0	0	1	0
0	36	1	2015	0	57	0	0	1	1	1	2	4	3	5.6764	0.44842	0	0	0	2	2	86	84	1	1	1	1
1	35	0	2015	0	34	0	0	1	1	1	4	4	4	7.8408	0.97404	0	1	1	2	2	52	4	0	0	0	0
0	16	1	2015	0	50	1	0	1	1	0	2	4	2	5.3856	0.51325	0	0	0	2	2	85	60	0	1	1	0
0	82	1	2015	0	59	1	0	1	0	1	0	4	4	4.0936	0.02239	0	0	0	2	2	86	1	1	1	1	0
0	50	1	2015	0	24	0	0	1	0	0	4	4	4	7.8408	0.98779	0	0	1	3	2	49	4	0	0	0	0
0	26	1	2015	0	18	0	0	1	0	0	4	4	4	7.8408	0.99226	0	0	0	1	2	61	5	0	0	0	0
0	59	1	2015	0	30	0	0	1	0	0	4	4	4	7.8408	0.88361	0	0	0	1	2	87	15	0	0	1	0
0	78	1	2015	0	25	1	0	0	0	0	2	4	4	5.9672	0.65088	1	0	0	3	2	41	2	1	0	0	0
0	64	1	2015	0	33	1	0	0	0	0	4	4	4	7.8408	0.85774	0	0	0	1	2	62	23	0	1	1	1
0	70	1	2015	0	36	0	0	1	1	0	4	2	3	6.0848	0.47261	1	0	1	2	2	66	47	0	1	1	1
0	61	0	2015	0	17	0	0	1	0	0	4	4	4	7.8408	0.95371	0	0	0	1	2	55	3	0	0	0	0
0	70	1	2015	0	27	1	0	0	0	0	4	4	4	7.8408	0.90529	5	0	1	1	2	42	15	1	0	0	0
0	72	1	2015	0	16	1	0	0	0	0	4	4	4	7.8408	0.95699	0	0	0	3	2	50	1	0	0	0	0
0	67	1	2015	0	16	1	0	0	0	0	4	2	4	6.3756	0.84604	0	0	0	1	2	46	34	1	0	0	0
0	71	0	2015	0	25	1	0	0	0	0	2	4	4	5.9672	0.65088	4	0	1	3	2	49	3	1	1	0	0
0	56	1	2015	0	17	0	0	1	0	0	4	4	4	7.8408	0.95371	2	0	0	2	2	101	6	0	0	1	0
0	75	0	2015	0	18	0	0	1	0	0	4	4	4	7.8408	0.9502	0	0	0	2	2	95	6	0	0	1	0
0	24	1	2015	0	18	0	0	1	0	0	4	4	4	7.8408	0.99226	0	0	0	1	2	40	7	0	0	0	0
0	69	1	2015	0	29	1	0	1	0	0	4	4	4	7.8408	0.89128	2	0	1	2	2	121	6	0	0	0	0
0	60	1	2015	0	16	1	0	0	0	0	0	4	4	4.0936	0.38365	0	0	0	1	2	87	16	0	0	1	0
0	55	1	2015	0	17	0	0	1	0	0	4	4	3	7.55	0.9398	0	0	0	1	2	77	5	0	0	1	0
1	63	0	2015	0	50	0	0	1	0	0	1	4	4	5.0304	0.10054	0	0	0	3	2	65	115	0	1	1	0
0	65	1	2015	0	27	1	1	1	0	0	4	4	4	7.8408	0.90529	0	0	1	2	2	122	1	0	1	1	0
0	17	0	2015	0	27	1	0	0	0	0	4	4	4	7.8408	0.98467	0	0	1	1	2	28	6	0	1	0	0
0	46	1	2015	0	35	1	0	0	0	1	2	4	4	5.9672	0.85322	0	0	1	3	2	28	3	1	1	0	0
0	82	0	2015	0	59	1	0	1	0	1	3	2	4	5.4388	0.07638	0	0	1	2	2	68	6	1	1	1	1
0	71	1	2015	0	22	0	0	1	1	0	4	4	3	7.55	0.91404	0	0	0	1	3	35	20	0	0	0	0
0	82	0	2015	0	34	1	0	1	0	1	4	4	4	7.8408	0.84811	0	0	1	2	3	70	12	0	0	0	1
0	16	1	2015	0	16	1	0	0	0	0	4	4	4	7.8408	0.99336	0	0	1	1	3	50	1	0	0	0	0
0	62	1	2015	0	18	0	0	1	0	0	2	4	4	5.9672	0.76142	0	0	1	2	3	39	8	1	1	1	0
0	32	0	2015	0	27	0	0	1	1	1	4	4	4	7.8408	0.98467	0	0	1	2	3	93	15	0	0	0	0
0	19	0	2015	0	34	1	0	1	0	1	4	4	4	7.8408	0.97404	0	0	0	1	3	98	13	0	0	1	0
0	57	0	2015	0	18	0	0	1	0	0	4	4	4	7.8408	0.9502	0	0	0	2	3	36	3	0	0	0	0
0	37	1	2015	0	20	0	0	1	0	0	4	4	4	7.8408	0.99099	0	0	1	1	3	55	9	0	0	0	0
0	76	0	2015	0	33	1	0	1	0	0	4	4	4	7.8408	0.85774	0	0	1	1	3	67	12	0	0	0	0
0	38	1	2015	0	21	0	0	1	0	0	4	4	4	7.8408	0.99028	0	1	0	2	3	94	11	0	0	1	0
0	28	1	2015	0	18	1	0	0	0	0	4	4	4	7.8408	0.99226	0	0	0	1	3	32	1	0	0	0	0
0	76	1	2015	0	18	1	0	0	0	0	4	4	4	7.8408	0.9502	0	0	0	2	3	376	9	0	0	0	0
0	81	0	2015	0	41	1	0	1	0	1	3	2	4	5.4388	0.24783	0	0	0	2	3	72	11	0	0	0	0
0	25	1	2015	0	19	1	0	0	0	1	3	4	4	6.904	0.97983	0	0	0	1	3	72	8	0	1	1	0
0	80	1	2015	0	24	0	0	1	0	0	4	4	4	7.8408	0.92329	0	0	0	3	3	655	32	0	0	0	0
0	78	1	2015	0	25	1	0	0	0	0	4	4	4	7.8408	0.91767	1	0	0	2	3	138	4	1	0	0	0
0	43	1	2015	0	18	1	0	0	0	0	4	4	4	7.8408	0.99226	0	0	1	1	3	37	13	0	0	1	0
1	49	1	2015	0	16	0	0	1	0	0	2	4	3	5.6764	0.94987	0	1	0	2	3	53	23	0	1	1	0
0	72	1	2015	0	25	1	0	0	0	0	0	4	4	4.0936	0.23771	0	0	1	3	3	33	3	1	0	0	0
1	16	1	2015	0	59	1	0	1	1	0	2	4	3	5.6764	0.4108	0	0	0	3	3	34	2	1	1	1	0
0	81	0	2015	0	18	1	0	0	0	1	4	4	4	7.8408	0.9502	0	0	0	2	3	54	1	0	0	0	0
0	60	0	2015	0	17	0	0	1	0	0	4	4	4	7.8408	0.95371	0	0	1	1	3	62	1	0	0	0	0
0	79	0	2015	0	29	1	0	1	0	0	4	4	4	7.8408	0.89128	0	0	1	1	3	45	8	0	0	0	0
0	80	1	2015	0	18	1	0	0	0	0	4	4	4	7.8408	0.9502	1	0	0	2	3	65	6	0	0	0	0
0	31	1	2015	0	30	0	0	1	0	0	4	4	3	7.55	0.97478	0	0	0	1	3	72	52	0	1	1	0
0	58	1	2015	0	38	0	0	1	1	0	3	4	3	6.6132	0.55997	0	0	0	1	3	81	49	0	1	0	0
0	75	1	2015	0	51	1	0	0	0	1	4	4	4	7.8408	0.60211	1	1	0	3	3	30	25	0	1	0	1
0	65	1	2015	0	16	1	0	0	0	0	4	4	4	7.8408	0.95699	0	0	1	2	3	84	1	0	0	0	0
0	31	1	2015	0	43	1	0	1	0	1	4	4	4	7.8408	0.9495	0	0	1	1	3	88	7	0	1	1	0
0	36	1	2015	0	36	1	0	1	0	0	4	4	4	7.8408	0.96987	0	0	0	1	3	35	3	0	0	0	0
0	73	1	2015	0	25	1	0	0	0	0	0	4	4	4.0936	0.23771	2	0	0	1	3	28	10	0	1	0	1
0	81	1	2015	0	22	1	0	1	0	0	4	4	4	7.8408	0.93348	1	0	0	1	3	90	11	0	0	0	0
0	81	1	2015	0	25	1	0	0	0	0	4	4	4	7.8408	0.91767	0	0	0	3	3	44	1	0	0	0	0
0	73	1	2015	0	25	1	0	0	0	0	4	4	4	7.8408	0.91767	0	1	0	1	3	26	12	0	1	0	0
0	62	1	2015	0	22	0	0	0	1	1	3	2	3	5.148	0.51786	0	0	0	1	3	117	25	0	1	1	1
0	84	0	2015	0	42	1	0	1	0	0	4	4	4	7.8408	0.75128	1	0	0	1	3	56	5	0	0	0	0
0	41	1	2015	0	21	0	0	1	0	0	4	4	3	7.55	0.98721	0	0	0	3	3	66	8	0	0	0	0
0	77	0	2015	0	41	1	0	1	1	1	4	4	4	7.8408	0.76536	0	0	1	2	3	47	1	0	0	1	0
0	74	1	2015	0	18	0	0	1	0	0	4	4	4	7.8408	0.9502	0	0	0	1	3	32	4	0	0	0	0
0	42	1	2015	0	30	1	0	0	0	0	4	4	4	7.8408	0.98078	0	0	1	2	3	33	8	0	0	0	0
0	72	1	2015	0	29	0	0	1	0	1	4	4	4	7.8408	0.89128	0	0	0	1	3	81	10	0	0	0	0
0	76	1	2015	0	18	0	0	1	0	0	4	4	4	7.8408	0.9502	0	0	0	2	4	82	3	0	0	0	0
0	39	1	2015	0	25	0	0	0	1	0	4	2	4	6.3756	0.94872	0	0	0	1	4	53	5	0	0	1	1
0	70	0	2015	0	36	1	0	1	0	0	4	4	4	7.8408	0.82725	2	1	0	1	4	106	15	0	0	1	0
1	89	1	2015	0	34	0	0	1	0	0	4	4	4	7.8408	0.84811	0	0	0	1	4	64	3	1	0	1	0
0	90	1	2015	0	43	1	0	1	0	1	3	1	3	4.4154	0.09617	0	0	0	2	4	65	1	1	1	0	0
0	48	1	2015	0	33	0	0	1	1	0	3	2	4	5.4388	0.80367	0	0	1	2	4	65	8	0	1	1	1
0	65	1	2015	0	22	0	0	1	0	1	4	4	3	7.55	0.91404	0	0	0	1	4	41	10	0	0	1	0
0	43	1	2015	0	33	0	0	1	1	0	4	4	4	7.8408	0.97592	1	1	0	1	4	28	32	0	0	0	1
0	65	1	2015	0	17	0	0	1	0	0	4	4	4	7.8408	0.95371	0	0	0	1	4	81	3	0	0	1	0
0	76	0	2015	0	17	0	0	1	0	0	4	4	4	7.8408	0.95371	2	0	0	1	4	38	1	0	0	0	0
0	34	1	2015	0	26	1	0	1	0	0	4	4	4	7.8408	0.98579	0	0	0	1	4	51	4	0	0	0	0
0	75	1	2015	0	26	1	0	1	0	0	2	4	4	5.9672	0.63323	0	0	0	2	4	57	44	0	1	0	0
0	51	1	2015	0	17	1	0	0	0	0	4	2	4	6.3756	0.97159	0	0	1	2	4	32	4	0	0	0	0
0	70	1	2015	0	29	0	0	1	0	1	4	4	4	7.8408	0.89128	0	0	1	2	4	33	14	0	0	0	0
0	63	0	2015	0	42	1	0	1	0	0	1	4	4	5.0304	0.17125	0	0	0	2	4	75	3	1	1	1	0
0	21	1	2015	0	21	0	0	1	0	0	4	4	4	7.8408	0.99028	0	0	0	1	4	57	10	0	0	0	1
0	52	1	2015	0	29	0	0	1	0	1	4	4	4	7.8408	0.98217	0	0	0	1	4	80	5	0	0	0	0
0	81	0	2015	0	26	0	0	1	0	0	4	4	4	7.8408	0.91168	2	0	0	2	4	70	19	0	1	0	0
0	60	1	2015	0	50	1	0	1	1	0	3	4	4	6.904	0.40059	0	0	0	2	4	89	52	0	1	1	1
0	19	1	2016	0	17	0	0	1	0	0	4	4	4	7.8408	0.99283	0	0	0	3	4	60	3	0	0	1	0
0	69	1	2016	0	17	1	0	0	0	0	4	4	4	7.8408	0.95371	0	0	1	2	4	80	1	0	0	0	0
0	58	1	2016	0	21	0	0	1	0	0	4	4	4	7.8408	0.9381	1	1	0	3	4	58	2	0	0	0	0
0	81	0	2016	0	26	1	0	1	0	0	4	4	3	7.55	0.88663	0	0	0	2	4	38	11	0	0	0	0
0	62	0	2016	0	57	1	1	1	1	1	2	1	3	3.4786	0.01463	0	0	0	1	4	51	55	0	1	1	0
0	85	0	2016	0	25	0	0	0	0	0	4	4	4	7.8408	0.91767	0	0	1	2	4	63	42	1	0	0	0
0	44	1	2016	0	41	1	1	1	0	0	4	4	4	7.8408	0.95637	0	0	1	2	4	58	8	0	0	0	0
0	64	1	2016	0	42	1	0	1	0	0	3	4	4	6.904	0.55265	0	0	1	3	4	57	13	0	0	0	0
0	42	1	2016	0	34	1	0	1	0	1	2	1	3	3.4786	0.3686	0	0	0	3	4	108	66	0	1	1	1
0	44	1	2016	0	17	0	0	1	0	0	0	4	4	4.0936	0.79484	0	0	0	1	4	76	6	0	0	1	0
0	89	1	2016	0	16	1	0	0	0	0	4	4	4	7.8408	0.95699	0	0	0	1	4	56	10	0	0	0	0
0	74	1	2016	0	17	1	0	0	0	0	3	4	3	6.6132	0.86458	0	0	0	1	4	26	7	0	0	0	0
0	40	0	2016	0	17	0	0	1	0	0	4	4	4	7.8408	0.99283	0	0	0	1	4	70	1	0	0	0	0
0	86	1	2016	0	42	1	0	1	0	0	3	4	4	6.904	0.55265	0	0	0	2	4	68	10	1	0	1	0
1	16	0	2016	0	17	0	0	0	0	1	4	4	4	7.8408	0.99283	1	0	1	2	4	64	5	0	0	1	1
0	81	0	2016	0	26	1	0	0	0	0	4	4	4	7.8408	0.91168	0	0	0	1	4	41	1	0	0	0	0
0	70	1	2016	0	34	0	0	1	1	1	4	4	4	7.8408	0.84811	0	0	1	2	4	48	13	0	1	0	1
0	44	1	2016	0	34	1	0	1	0	1	3	4	3	6.6132	0.92081	0	0	0	3	4	84	17	0	1	1	0
0	39	1	2016	0	45	1	0	1	0	0	4	4	4	7.8408	0.9416	0	0	0	2	4	42	10	1	0	0	0
0	76	0	2016	0	43	1	0	1	0	1	4	3	3	6.8174	0.51298	0	0	1	2	4	25	111	0	1	0	1
0	68	1	2016	0	21	0	0	1	0	0	4	4	4	7.8408	0.9381	0	0	0	1	4	100	3	0	0	1	0
0	31	1	2016	0	22	1	0	0	0	1	4	4	4	7.8408	0.98951	0	0	0	3	4	78	4	0	0	1	0
0	56	1	2016	0	17	0	0	1	0	0	4	4	4	7.8408	0.95371	0	0	0	2	4	96	10	0	0	0	0
0	52	1	2016	0	26	1	0	1	0	0	4	4	4	7.8408	0.98579	0	0	1	1	4	62	8	0	0	1	0
0	23	1	2016	0	18	0	0	1	1	0	4	4	4	7.8408	0.99226	0	0	0	3	1	41	11	0	0	0	1
0	44	1	2016	0	17	1	0	0	0	0	4	4	4	7.8408	0.99283	0	0	0	2	1	43	6	0	0	0	0
0	64	1	2016	0	33	1	0	1	0	0	2	4	4	5.9672	0.50212	2	0	0	2	1	75	6	0	0	1	0
0	66	1	2016	0	21	1	0	0	0	0	4	4	4	7.8408	0.9381	0	0	0	2	1	39	6	0	0	0	0
0	75	1	2016	0	21	1	0	0	0	0	4	4	4	7.8408	0.9381	1	0	0	1	1	53	8	0	0	0	0
0	47	0	2016	0	41	1	0	1	0	1	4	4	4	7.8408	0.95637	0	0	0	3	1	70	4	0	0	1	0
0	74	1	2016	0	26	1	0	0	0	0	0	4	4	4.0936	0.22407	2	0	1	3	1	35	2	1	0	0	0
0	72	1	2016	0	20	0	0	1	0	0	4	4	4	7.8408	0.94241	0	0	0	2	1	43	10	0	0	0	0
0	80	0	2016	0	36	1	0	1	0	0	4	4	4	7.8408	0.82725	0	0	0	2	1	69	25	0	0	0	0
0	80	1	2016	0	16	1	0	0	0	0	0	4	4	4.0936	0.38365	0	0	0	2	1	35	1	0	0	0	0
0	49	1	2016	0	24	0	0	1	0	0	4	4	3	7.55	0.98394	0	0	0	2	1	110	12	0	1	1	0
0	83	1	2016	0	34	1	0	1	0	1	4	4	4	7.8408	0.84811	0	0	0	2	1	104	17	0	0	1	0
0	68	1	2016	0	17	0	0	1	0	0	4	4	3	7.55	0.9398	0	0	0	1	1	53	16	0	0	0	0
0	28	1	2016	0	22	0	0	1	1	0	3	4	3	6.6132	0.96692	0	0	1	1	1	92	5	0	1	1	1
0	26	1	2016	0	17	0	0	1	0	0	4	4	3	7.55	0.99056	0	0	0	1	1	137	1	0	0	1	0
0	21	1	2016	0	24	0	0	1	0	0	4	4	3	7.55	0.98394	0	0	0	2	1	88	16	0	0	0	0
0	21	1	2016	0	29	1	0	0	0	1	4	4	3	7.55	0.9766	0	0	0	2	1	123	1	0	0	1	0
0	37	1	2016	0	34	1	0	1	1	1	4	4	4	7.8408	0.97404	0	0	0	1	1	124	10	0	0	1	0
0	56	1	2016	0	29	1	0	1	0	0	2	4	4	5.9672	0.57828	0	0	0	2	1	55	13	0	1	0	0
0	75	1	2016	0	30	1	0	0	0	0	1	4	4	5.0304	0.34182	0	0	1	1	1	110	2	1	1	1	0
1	49	1	2016	0	43	0	0	1	0	1	4	4	4	7.8408	0.9495	1	1	0	3	1	59	14	1	1	0	0
0	70	1	2016	0	16	1	0	0	0	0	4	4	4	7.8408	0.95699	1	0	0	2	1	42	1	0	0	0	0
0	68	1	2016	0	29	1	0	1	0	0	4	4	3	7.55	0.86132	0	0	0	2	1	76	7	0	0	1	0
0	49	1	2016	0	22	0	0	1	0	1	4	4	3	7.55	0.9862	0	0	1	1	1	66	6	0	0	0	0
0	64	0	2016	0	41	1	0	1	1	0	2	4	3	5.6764	0.29246	0	0	1	2	1	66	58	0	1	1	0
0	79	1	2016	0	27	1	0	1	0	1	4	4	4	7.8408	0.90529	4	0	0	1	1	69	113	0	0	1	0
0	82	1	2016	0	17	1	0	0	0	0	4	4	4	7.8408	0.95371	2	0	0	1	1	46	8	0	0	0	0
0	58	0	2016	0	21	0	0	1	0	0	4	4	4	7.8408	0.9381	0	0	0	1	1	33	1	0	0	0	0
0	90	0	2016	0	26	1	0	0	0	0	0	4	4	4.0936	0.22407	0	0	0	3	1	32	2	1	0	0	0
0	55	0	2016	0	17	1	0	0	0	0	4	4	4	7.8408	0.95371	0	0	0	3	1	46	1	0	0	0	0
0	60	0	2016	0	26	1	0	0	0	0	2	4	4	5.9672	0.63323	0	0	1	2	1	16	12	0	1	0	0
0	16	1	2016	0	50	0	0	1	1	1	3	3	3	5.8806	0.62842	0	0	1	1	1	32	28	0	1	0	1
0	23	1	2016	0	17	0	0	1	0	0	4	4	4	7.8408	0.99283	1	1	0	1	1	82	5	0	0	0	0
0	33	1	2016	0	21	1	0	0	0	0	3	4	4	6.904	0.97656	0	0	0	3	1	38	10	0	0	0	0
0	53	0	2016	0	17	0	0	1	0	0	4	4	4	7.8408	0.99283	0	0	1	1	1	51	4	0	0	0	0
0	82	0	2016	0	16	1	0	0	0	0	4	4	3	7.55	0.944	1	0	1	2	1	81	12	0	0	0	0
0	55	1	2016	0	29	1	0	0	0	0	2	4	4	5.9672	0.57828	0	0	0	1	1	39	7	1	1	0	0
0	78	0	2016	0	30	0	0	1	0	0	3	2	4	5.4388	0.43403	0	0	0	1	1	79	16	0	0	0	0
0	84	1	2016	0	34	1	1	1	0	0	3	4	4	6.904	0.69546	0	0	0	1	1	106	53	0	1	1	0
0	68	1	2016	0	16	1	0	0	0	0	4	4	4	7.8408	0.95699	0	0	1	2	1	32	3	0	0	0	0
0	78	0	2016	0	25	1	0	0	0	0	2	4	4	5.9672	0.65088	1	0	1	1	1	44	7	0	0	0	0
0	51	0	2016	0	25	1	0	0	0	0	4	4	4	7.8408	0.98683	0	0	1	2	1	61	4	0	0	0	1
0	41	1	2016	0	26	0	0	1	1	0	4	4	4	7.8408	0.98579	0	0	0	1	1	38	10	0	0	1	0
1	16	0	2016	0	17	0	0	1	0	0	4	4	4	7.8408	0.99283	0	1	0	2	1	176	25	0	1	1	0
0	81	1	2016	0	25	1	0	0	0	0	0	4	4	4.0936	0.23771	2	0	0	3	1	90	1	0	0	0	0
0	47	1	2016	0	34	1	0	1	1	1	4	4	3	7.55	0.96602	0	0	0	2	1	65	24	0	1	0	1
0	93	0	2016	0	75	1	0	0	0	0	0	4	4	4.0936	0.00666	0	0	0	3	1	26	12	0	1	0	0
1	19	0	2016	0	22	1	0	0	0	1	4	3	3	6.8174	0.97261	1	1	0	2	2	112	37	0	1	1	1
0	66	0	2016	0	17	1	0	0	0	0	4	4	4	7.8408	0.95371	0	0	0	3	2	57	1	0	0	0	0
0	65	0	2016	0	26	0	0	1	1	0	4	4	3	7.55	0.88663	0	0	0	1	2	83	3	0	0	1	1
0	84	0	2016	0	25	1	0	0	0	0	4	4	4	7.8408	0.91767	3	0	0	3	2	37	2	1	0	0	0
0	19	1	2016	0	17	1	0	0	0	0	2	4	4	5.9672	0.95861	0	0	1	2	2	30	1	0	0	0	0
0	69	1	2016	0	25	0	0	1	0	1	4	4	4	7.8408	0.91767	1	0	0	1	2	110	10	0	0	1	0
0	24	1	2016	0	33	0	0	1	0	0	0	2	3	2.3376	0.17503	0	0	0	1	2	70	2	1	1	1	0
1	57	1	2016	0	33	0	0	1	1	0	4	4	4	7.8408	0.85774	1	0	0	3	2	61	20	0	1	0	1
0	69	1	2016	0	41	1	0	1	0	1	4	4	4	7.8408	0.76536	0	0	0	2	2	40	30	0	0	0	0
0	42	1	2016	0	26	0	0	1	1	0	4	4	3	7.55	0.98133	0	0	1	2	2	64	7	0	0	1	0
0	78	1	2016	0	24	0	0	1	0	0	4	4	4	7.8408	0.92329	0	0	1	1	2	52	10	0	0	0	0
0	56	1	2016	0	26	0	0	1	1	0	4	3	4	7.1082	0.83686	0	0	1	3	2	102	4	0	0	1	1
0	37	1	2016	0	20	0	0	0	0	1	4	4	4	7.8408	0.99099	0	0	0	3	2	38	5	0	0	0	1
0	53	1	2016	0	29	0	0	1	0	1	4	4	4	7.8408	0.98217	0	0	1	3	2	89	8	0	0	1	1
1	37	0	2016	0	34	0	0	1	0	0	4	4	4	7.8408	0.97404	0	0	0	2	2	89	86	1	1	1	0
0	87	0	2016	0	16	1	0	0	0	0	4	4	4	7.8408	0.95699	0	0	0	2	2	46	1	0	0	0	0
0	47	1	2016	0	17	1	0	0	0	0	4	4	3	7.55	0.99056	0	0	1	1	2	74	1	0	0	0	0
0	66	0	2016	0	24	0	0	1	0	0	4	4	4	7.8408	0.92329	0	0	1	1	2	84	6	0	0	1	1
0	57	1	2016	0	22	0	1	1	0	0	4	4	4	7.8408	0.93348	0	0	0	1	2	32	5	0	0	0	0
0	80	0	2016	0	18	1	0	0	0	0	4	4	4	7.8408	0.9502	1	0	0	1	2	40	1	0	0	0	0
0	47	1	2016	0	26	0	0	1	0	1	4	4	4	7.8408	0.98579	0	0	0	1	2	91	3	0	0	1	1
0	58	1	2016	0	25	1	0	1	0	0	3	1	4	4.7062	0.35879	0	0	0	2	2	90	19	0	0	1	1
0	56	0	2016	0	18	0	0	1	0	0	4	4	4	7.8408	0.9502	0	0	0	1	2	45	13	0	0	0	0
0	39	1	2016	0	21	0	0	1	0	0	4	4	4	7.8408	0.99028	0	0	1	3	2	44	5	0	0	0	0
0	18	0	2016	0	18	0	0	0	1	0	4	4	3	7.55	0.98981	0	0	0	1	2	100	10	0	0	1	1
0	22	1	2016	0	21	0	0	1	0	0	4	4	4	7.8408	0.99028	0	0	0	2	2	46	4	0	0	0	0
0	69	1	2016	0	26	1	0	0	0	1	4	4	4	7.8408	0.91168	1	0	1	2	2	55	1	0	0	0	0
0	93	1	2016	0	16	1	0	0	0	0	4	4	4	7.8408	0.95699	2	0	1	3	2	31	4	0	0	0	0
0	70	1	2016	0	36	1	0	1	0	0	4	4	4	7.8408	0.82725	0	0	0	1	2	39	3	0	0	0	0
0	23	1	2016	0	38	1	0	1	0	0	2	4	4	5.9672	0.82196	0	0	0	1	2	74	26	0	1	1	0
0	87	0	2016	0	16	1	0	0	0	0	4	4	4	7.8408	0.95699	1	0	1	3	2	70	2	0	0	0	0
0	23	0	2016	0	30	0	0	0	1	0	4	4	4	7.8408	0.98078	0	0	1	1	2	57	23	0	1	0	1
0	80	1	2016	0	25	1	0	0	0	0	4	4	4	7.8408	0.91767	2	0	1	2	2	28	3	0	0	0	0
0	26	0	2016	0	21	0	0	1	0	0	4	4	4	7.8408	0.99028	0	0	0	1	2	87	5	0	0	1	0
0	56	1	2016	0	29	1	0	1	0	0	4	2	3	6.0848	0.60538	0	0	0	1	2	124	89	0	1	1	0
1	25	1	2016	0	17	0	0	0	0	1	4	4	3	7.55	0.99056	0	0	0	2	2	83	26	0	1	0	1
0	56	0	2016	0	24	0	0	1	0	0	4	4	3	7.55	0.90117	0	0	1	1	2	63	6	0	0	1	0
0	80	0	2016	0	21	0	0	1	0	0	4	4	4	7.8408	0.9381	0	0	0	1	2	57	1	0	0	0	0
0	86	1	2016	0	30	1	0	0	0	0	4	4	4	7.8408	0.88361	1	0	0	2	2	45	6	0	0	1	0
0	55	1	2016	0	34	0	0	1	1	1	4	4	3	7.55	0.80882	0	0	0	3	2	110	25	0	0	1	1
0	71	1	2016	0	17	1	0	0	0	0	4	4	4	7.8408	0.95371	0	0	0	1	2	25	4	0	0	0	0
0	65	1	2016	0	57	1	0	1	1	0	2	4	4	5.9672	0.13768	0	0	0	1	3	73	36	0	1	1	1
0	54	1	2016	0	16	0	0	1	0	0	4	4	4	7.8408	0.99336	0	0	0	2	3	45	3	0	0	0	0
0	25	1	2016	0	36	1	0	1	0	0	4	4	4	7.8408	0.96987	0	0	0	1	3	94	14	0	0	1	0
0	50	1	2016	0	29	0	0	1	0	0	4	4	4	7.8408	0.98217	0	0	0	3	3	62	16	0	0	1	0
0	60	1	2016	0	20	1	0	0	0	0	4	4	4	7.8408	0.94241	0	0	1	2	3	131	3	0	0	1	0
1	53	1	2016	1	21	0	0	1	0	0	3	4	4	6.904	0.97656	3	0	0	2	3	83	24	0	0	1	1
0	62	1	2016	0	42	1	0	1	0	0	0	4	4	4.0936	0.07792	0	0	0	2	3	41	3	1	1	0	0
0	69	1	2016	0	25	1	0	0	0	0	3	4	4	6.904	0.82009	3	0	0	1	3	43	2	1	0	0	0
1	65	0	2016	0	29	0	0	1	1	0	4	4	4	7.8408	0.89128	0	0	0	2	3	39	10	0	1	0	0
0	83	1	2016	0	35	1	0	0	0	1	4	4	4	7.8408	0.83795	0	0	0	1	3	57	29	0	0	0	0
0	80	0	2016	0	18	0	0	1	0	0	4	4	4	7.8408	0.9502	1	0	0	1	3	54	11	0	0	0	0
0	83	1	2016	1	41	0	0	1	1	1	4	3	4	7.1082	0.61847	0	0	0	1	3	117	21	0	1	1	1
0	70	1	2016	0	17	1	0	0	0	0	4	4	4	7.8408	0.95371	0	0	1	2	3	46	7	0	0	0	0
0	71	1	2016	0	42	1	0	1	0	0	3	4	4	6.904	0.55265	0	0	1	3	3	72	13	0	1	1	0
0	53	1	2016	0	54	1	0	1	0	0	4	4	3	7.55	0.85955	1	0	0	2	3	89	7	0	0	1	0
1	32	0	2016	0	41	0	1	1	0	1	3	4	3	6.6132	0.87168	1	1	0	1	3	33	41	0	1	0	0
0	81	0	2016	0	50	1	0	1	0	1	4	4	4	7.8408	0.62036	0	0	0	1	3	111	22	0	0	1	0
0	81	0	2016	0	66	1	0	1	1	1	2	4	4	5.9672	0.07406	0	0	0	3	3	30	4	1	1	0	1
0	64	1	2016	0	36	1	0	1	0	0	4	2	4	6.3756	0.54187	1	1	0	1	3	82	39	0	0	1	0
0	44	0	2016	0	26	0	0	1	1	0	4	4	3	7.55	0.98133	0	0	0	2	3	50	19	0	1	1	1
0	83	1	2016	0	36	1	0	1	0	0	3	3	4	6.1714	0.49325	0	0	1	1	3	65	16	0	0	0	0
0	83	0	2016	0	34	1	0	1	0	1	4	4	4	7.8408	0.84811	0	0	0	1	3	118	6	0	0	1	0
0	19	0	2016	0	34	1	0	1	0	1	4	4	3	7.55	0.96602	0	0	1	2	3	61	10	0	1	1	1
0	67	1	2016	0	25	0	0	1	0	1	4	4	3	7.55	0.89412	0	0	0	2	3	37	5	0	0	0	1
0	91	0	2016	0	26	0	0	1	0	0	4	4	4	7.8408	0.91168	5	0	0	1	3	147	7	0	0	0	0
0	70	1	2016	0	29	0	0	1	0	1	4	4	4	7.8408	0.89128	0	0	0	1	3	66	3	0	0	0	0
0	47	1	2016	0	45	1	0	1	0	0	1	4	3	4.7396	0.45524	0	0	0	1	3	31	10	1	1	1	0
0	64	1	2016	0	26	1	0	1	0	0	4	4	4	7.8408	0.91168	0	0	1	1	3	43	6	0	0	0	0
0	81	1	2016	0	45	0	0	1	0	1	4	3	3	6.8174	0.4746	0	0	0	3	3	68	85	0	1	1	1
0	77	1	2016	0	29	1	0	1	0	0	3	4	4	6.904	0.77026	0	0	0	1	3	102	4	0	1	1	0
0	69	1	2016	0	41	1	0	1	1	0	2	4	4	5.9672	0.35299	0	0	0	1	3	116	44	0	1	1	0
0	41	1	2016	0	18	0	0	1	0	0	4	4	4	7.8408	0.99226	0	0	1	2	3	93	4	0	0	1	0
0	77	1	2016	0	20	0	0	1	0	0	4	4	4	7.8408	0.94241	1	0	0	1	3	101	10	0	0	1	0
0	43	1	2016	0	17	0	0	1	0	0	4	4	4	7.8408	0.99283	0	0	0	2	3	42	4	0	0	0	0
0	52	1	2016	0	25	1	0	0	0	0	1	4	4	5.0304	0.83672	0	0	0	3	3	40	2	1	1	0	0
0	48	1	2016	0	17	1	0	0	0	0	4	4	4	7.8408	0.99283	0	0	0	1	3	79	8	0	0	0	0
0	34	0	2016	0	18	0	0	1	0	0	4	4	4	7.8408	0.99226	0	1	0	2	3	40	3	0	0	1	0
0	53	1	2016	0	19	1	0	0	1	0	4	4	4	7.8408	0.99165	2	0	0	1	3	97	12	0	1	0	0
0	93	0	2016	0	16	1	0	0	0	0	4	4	4	7.8408	0.95699	0	0	0	1	3	30	4	0	0	0	0
0	75	0	2016	0	17	1	0	0	0	0	4	4	4	7.8408	0.95371	0	0	0	2	3	34	3	0	0	0	0
1	79	1	2016	0	32	0	0	1	0	0	3	4	4	6.904	0.72699	0	0	0	1	4	84	7	1	1	1	0
0	66	0	2016	0	25	1	0	1	0	0	4	4	4	7.8408	0.91767	1	0	1	1	4	82	7	0	0	0	0
0	81	1	2016	0	29	0	0	1	1	0	4	4	4	7.8408	0.89128	0	0	1	1	4	93	14	0	0	0	1
0	54	1	2016	0	17	0	0	1	0	0	4	4	3	7.55	0.99056	0	0	0	1	4	126	19	0	0	1	0
0	67	1	2016	0	18	0	0	1	0	0	4	4	4	7.8408	0.9502	0	1	0	3	4	41	9	0	0	0	0
0	34	1	2016	0	24	0	0	1	0	0	4	4	4	7.8408	0.98779	0	0	0	1	4	125	9	0	0	1	0
0	65	0	2016	0	36	1	0	1	0	0	4	4	4	7.8408	0.82725	2	0	0	1	4	78	10	0	1	1	1
0	45	1	2016	0	17	0	0	1	0	0	4	4	4	7.8408	0.99283	0	0	0	3	4	79	3	0	0	0	0
0	20	1	2016	0	24	0	0	1	0	0	4	4	4	7.8408	0.98779	0	0	0	2	4	27	4	0	0	0	0
0	87	0	2016	0	18	1	0	0	0	1	4	4	4	7.8408	0.9502	4	0	0	1	4	37	14	0	0	0	0
0	19	1	2016	0	30	1	0	0	0	0	4	4	4	7.8408	0.98078	0	0	1	3	4	58	8	0	0	0	0
0	66	0	2016	0	16	0	0	1	0	0	4	4	4	7.8408	0.95699	0	0	0	2	4	66	5	0	0	0	0
0	57	1	2016	0	20	0	0	1	0	0	4	4	4	7.8408	0.94241	1	1	0	1	4	77	13	0	0	1	0
0	93	1	2016	0	18	1	0	0	0	0	3	4	4	6.904	0.88641	0	0	0	1	4	72	7	0	0	0	0
0	52	1	2016	0	34	1	0	1	0	1	2	4	4	5.9672	0.86258	0	0	0	3	4	31	15	0	0	0	0
0	44	1	2016	0	18	0	0	1	0	0	4	4	4	7.8408	0.99226	0	0	0	1	4	101	3	0	0	1	0
0	17	1	2017	0	16	1	0	0	0	0	4	4	4	7.8408	0.99336	0	0	0	1	4	32	1	0	0	0	0
[truncated: 715 more rows]
